# Supplementary material
Source: PubMed Central journal article supplement (PMC8342950)
Supplement: mmc1.pdf [file mmc1.pdf]

1 **Supplementary Figure 1: Level of trust in information sources for each of the COVID-19 vaccine intention group**

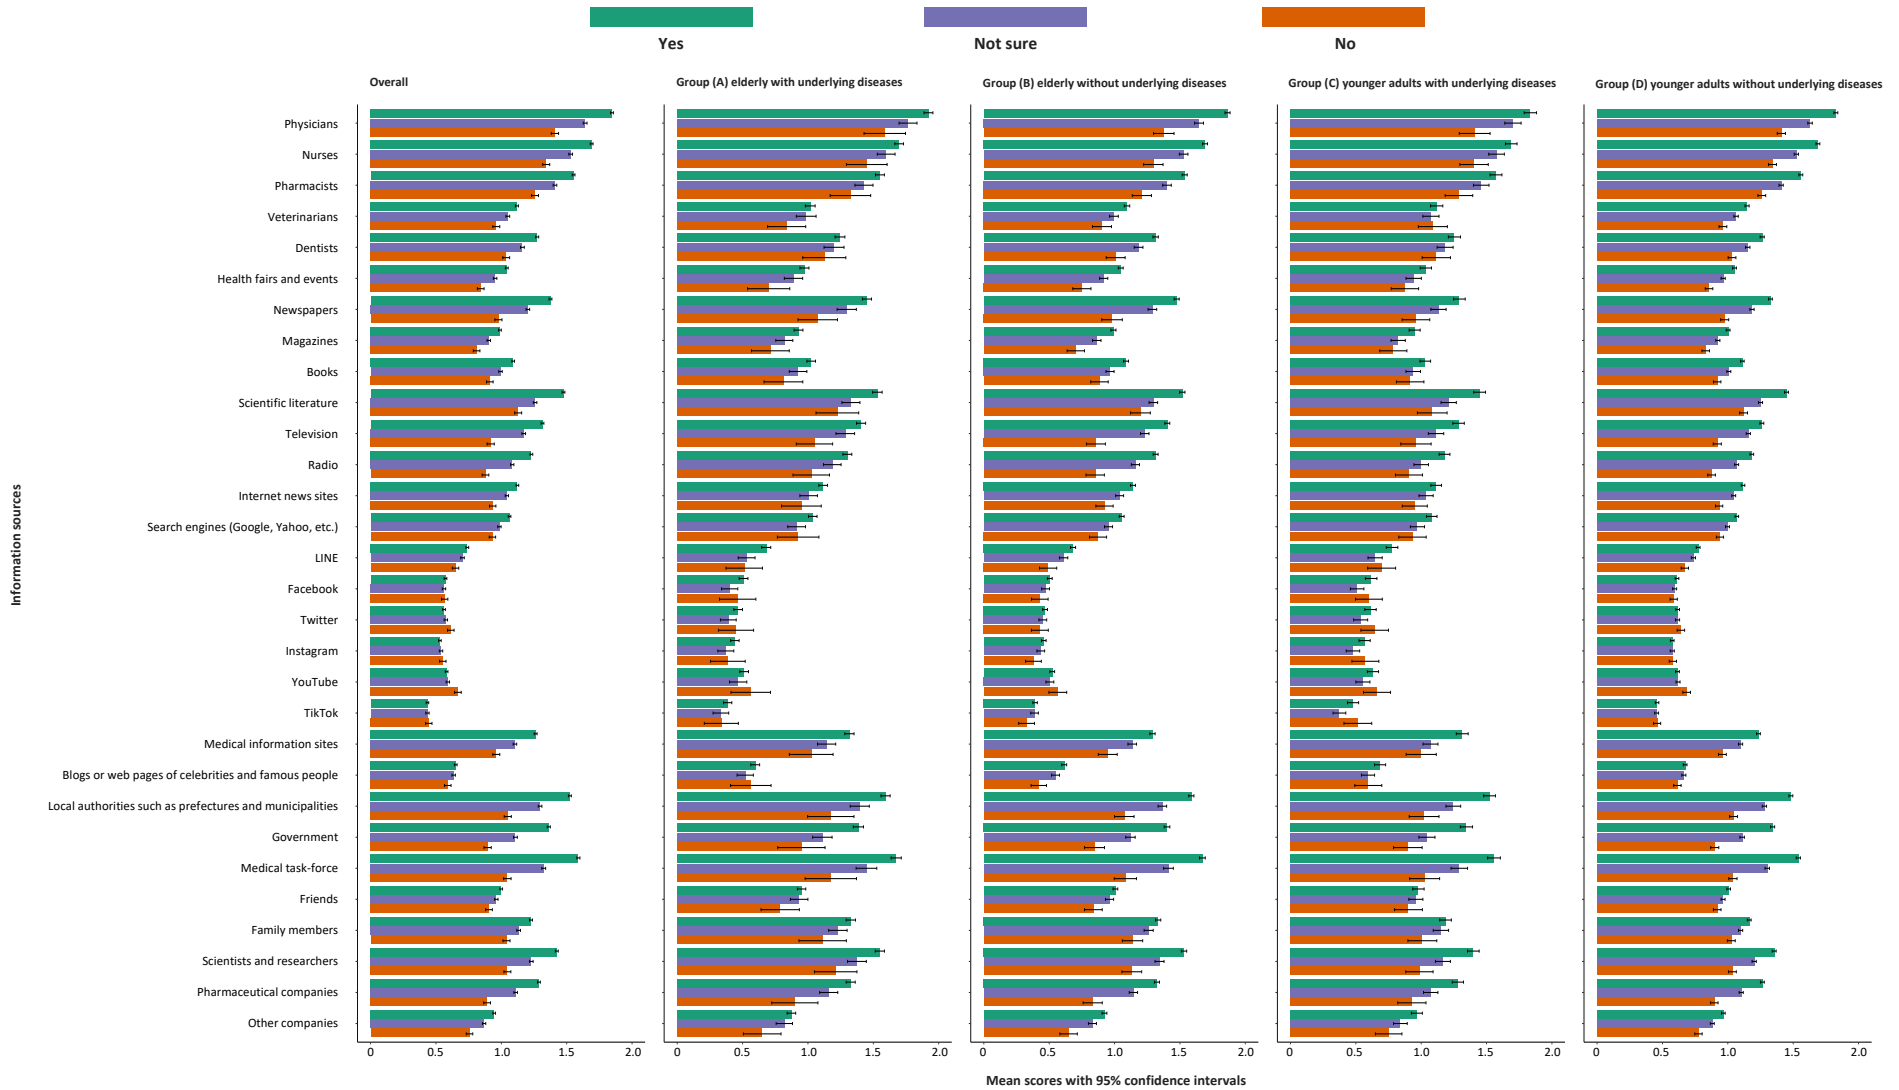

2

3 Data presented show the level of trust among the three the COVID-19 vaccine intention groups. The Likert scale was treated as a continuous variable, ranging from zero

4 (not at all) to three (extremely), which allowed for the calculation of the mean and standard errors of the scores for each source. Error bars present the 95% confidence

5 intervals of these means. Exact values are presented in Supplementary Table 3.

1 **Supplementary Table1: Health-related and psychological characteristics of the study participants by three COVID-**

2 **19 vaccine intention groups**

|                                                                                                                                                                      | Yes<br>N = 16869 | Not sure<br>N = 9874 | No<br>N = 3310 | P-value | Total<br>N = 30053 |
|----------------------------------------------------------------------------------------------------------------------------------------------------------------------|------------------|----------------------|----------------|---------|--------------------|
| <b>Health-related characteristics, including health literacy</b>                                                                                                     |                  |                      |                |         |                    |
| Self-reported health status (SA)                                                                                                                                     |                  |                      |                | <0.001  |                    |
| Very good                                                                                                                                                            | 5008 (29.7)      | 2586 (26.2)          | 1075 (32.5)    |         | 8669 (28.8)        |
| Good                                                                                                                                                                 | 5423 (32.1)      | 2813 (28.5)          | 875 (26.4)     |         | 9111 (30.3)        |
| Fair                                                                                                                                                                 | 4528 (26.8)      | 3103 (31.4)          | 921 (27.8)     |         | 8552 (28.5)        |
| Poor                                                                                                                                                                 | 1620 (9.6)       | 1087 (11.0)          | 324 (9.8)      |         | 3031 (10.1)        |
| Very poor                                                                                                                                                            | 290 (1.7)        | 285 (2.9)            | 115 (3.5)      |         | 690 (2.3)          |
| Have you ever received a COVID-19 test? (MA)                                                                                                                         |                  |                      |                |         |                    |
| No                                                                                                                                                                   | 15313 (90.8)     | 9123 (92.4)          | 3000 (90.6)    | <0.001  | 27436 (91.3)       |
| Yes – PCR test                                                                                                                                                       | 1078 (6.4)       | 459 (4.6)            | 153 (4.6)      | <0.001  | 1690 (5.6)         |
| Yes – antigen test                                                                                                                                                   | 222 (1.3)        | 79 (0.8)             | 51 (1.5)       | <0.001  | 352 (1.2)          |
| Yes – antibody testing                                                                                                                                               | 203 (1.2)        | 79 (0.8)             | 31 (0.9)       | 0.006   | 313 (1.0)          |
| Yes – unsure about either of the three                                                                                                                               | 188 (1.1)        | 182 (1.8)            | 89 (2.7)       | <0.001  | 459 (1.5)          |
| Presence of underlying diseases (e.g. diabetes, heart failure, respiratory disease, COPD, etc., or on dialysis, or using immunosuppressive or anticancer drugs) (SA) | 14158 (83.9)     | 8913 (90.3)          | 3005 (90.8)    | <0.001  | 26076 (86.8)       |
| Living with family members who are elderly or have underlying diseases (SA)                                                                                          | 13720 (81.3)     | 8525 (86.3)          | 2931 (88.5)    | <0.001  | 25176 (83.8)       |
| Preventive measures against COVID-19 (MA)                                                                                                                            |                  |                      |                |         |                    |
| Avoid going to places with poor ventilation                                                                                                                          | 9389 (55.7)      | 4691 (47.5)          | 1289 (38.9)    | <0.001  | 15369 (51.1)       |
| Avoid going to places where there are many people gathered                                                                                                           | 13812 (81.9)     | 7309 (74.0)          | 1980 (59.8)    | <0.001  | 23101 (76.9)       |
| Avoiding talking or speaking in close proximity to other people                                                                                                      | 9566 (56.7)      | 4656 (47.2)          | 1237 (37.4)    | <0.001  | 15459 (51.4)       |
| Washing hands, gargling, and hand disinfection with alcohol.                                                                                                         | 14411 (85.4)     | 7714 (78.1)          | 2036 (61.5)    | <0.001  | 24161 (80.4)       |
| Etiquette (masks, handkerchiefs, etc.) in case of coughing or sneezing                                                                                               | 12205 (72.4)     | 6447 (65.3)          | 1673 (50.5)    | <0.001  | 20325 (67.6)       |
| Telework                                                                                                                                                             | 1437 (8.5)       | 701 (7.1)            | 257 (7.8)      | <0.001  | 2395 (8.0)         |
| Be conscious of social distancing                                                                                                                                    | 8638 (51.2)      | 4151 (42.0)          | 1069 (32.3)    | <0.001  | 13858 (46.1)       |
| Avoid going out unnecessarily.                                                                                                                                       | 11598 (68.8)     | 5964 (60.4)          | 1416 (42.8)    | <0.001  | 18978 (63.1)       |
| Other preventive measures                                                                                                                                            | 460 (2.7)        | 333 (3.4)            | 120 (3.6)      | 0.001   | 913 (3.0)          |
| No preventive measures                                                                                                                                               | 368 (2.2)        | 602 (6.1)            | 462 (14.0)     | <0.001  | 1432 (4.8)         |
| Has anyone close to you ever been infected with COVID-19? (MA)                                                                                                       |                  |                      |                |         |                    |
| Family or friends                                                                                                                                                    | 628 (3.7)        | 242 (2.5)            | 100 (3.0)      | <0.001  | 970 (3.2)          |
| Colleagues at work                                                                                                                                                   | 851 (5.0)        | 429 (4.3)            | 198 (6.0)      | <0.001  | 1478 (4.9)         |
| No/I don't know.                                                                                                                                                     | 15453 (91.6)     | 9224 (93.4)          | 3016 (91.1)    | <0.001  | 27693 (92.1)       |
| Have you ever refrained from visiting a medical institution because you were anxious about being infected by the new coronavirus? (MA)                               |                  |                      |                |         |                    |
| Have refrained from regular hospital visits                                                                                                                          | 2744 (16.3)      | 1217 (12.3)          | 357 (10.8)     | <0.001  | 4318 (14.4)        |
| Have refrained from visiting the hospital for sudden symptoms such as a cold, headache, or stomachache                                                               | 1584 (9.4)       | 931 (9.4)            | 274 (8.3)      | 0.108   | 2789 (9.3)         |
| Have refrained from medical checkups, physical examinations, or cancer screenings                                                                                    | 1929 (11.4)      | 901 (9.1)            | 252 (7.6)      | <0.001  | 3082 (10.3)        |
| Have refrained from other medical examinations                                                                                                                       | 1612 (9.6)       | 1015 (10.3)          | 319 (9.6)      | 0.149   | 2946 (9.8)         |
| No                                                                                                                                                                   | 10425 (61.8)     | 6534 (66.2)          | 2311 (69.8)    | <0.001  | 19270 (64.1)       |
| How confident are you filling out medical forms by yourself? (health literacy) (SA)                                                                                  |                  |                      |                | <0.001  |                    |
| Not at all                                                                                                                                                           | 182 (1.1)        | 155 (1.6)            | 109 (3.3)      |         | 446 (1.5)          |
| A little bit                                                                                                                                                         | 645 (3.8)        | 504 (5.1)            | 250 (7.6)      |         | 1399 (4.7)         |
| Somewhat                                                                                                                                                             | 3128 (18.5)      | 2896 (29.3)          | 898 (27.1)     |         | 6922 (23.0)        |
| Extremely                                                                                                                                                            | 7814 (46.3)      | 4089 (41.4)          | 1150 (34.7)    |         | 13053 (43.4)       |
| Quite a bit                                                                                                                                                          | 5100 (30.2)      | 2230 (22.6)          | 903 (27.3)     |         | 8233 (27.4)        |

| <b>Psychological characteristics</b>                                                                                                            |              |             |             |              |
|-------------------------------------------------------------------------------------------------------------------------------------------------|--------------|-------------|-------------|--------------|
| How anxious are you about COVID-19? (SA) – perceived risks of COVID-19                                                                          |              |             |             | <0.001       |
| Not at all anxious                                                                                                                              | 951 (5.6)    | 735 (7.4)   | 878 (26.5)  | 2564 (8.5)   |
| Vaguely anxious                                                                                                                                 | 10331 (61.2) | 6317 (64.0) | 1638 (49.5) | 18286 (60.8) |
| Have a clear sense of anxiety                                                                                                                   | 4560 (27.0)  | 2060 (20.9) | 507 (15.3)  | 7127 (23.7)  |
| Feel fear and have anxiety                                                                                                                      | 1027 (6.1)   | 762 (7.7)   | 287 (8.7)   | 2076 (6.9)   |
| What is your best guess as to whether you will get COVID-19 within the next 6 months? (SA) – perceived risks of COVID-19                        |              |             |             | <0.001       |
| I don't think I will get COVID-19                                                                                                               | 9271 (55.0)  | 5279 (53.5) | 1951 (58.9) | 16501 (54.9) |
| I think I will get a mild case of COVID-19                                                                                                      | 5379 (31.9)  | 3279 (33.2) | 962 (29.1)  | 9620 (32.0)  |
| I think I will get seriously ill from COVID-19                                                                                                  | 2153 (12.8)  | 1158 (11.7) | 323 (9.8)   | 3634 (12.1)  |
| I have already had COVID-19                                                                                                                     | 66 (0.4)     | 158 (1.6)   | 74 (2.2)    | 298 (1.0)    |
| How do you think the disadvantages of the COVID-19 vaccine are? (SA) – perceived risks of a COVID-19 vaccine                                    |              |             |             | <0.001       |
| Very small                                                                                                                                      | 2275 (13.5)  | 150 (1.5)   | 99 (3.0)    | 2524 (8.4)   |
| Small                                                                                                                                           | 7843 (46.5)  | 1684 (17.1) | 373 (11.3)  | 9900 (32.9)  |
| Medium                                                                                                                                          | 5327 (31.6)  | 6425 (65.1) | 1651 (49.9) | 13403 (44.6) |
| Large                                                                                                                                           | 1214 (7.2)   | 1388 (14.1) | 774 (23.4)  | 3376 (11.2)  |
| Very large                                                                                                                                      | 210 (1.2)    | 227 (2.3)   | 413 (12.5)  | 850 (2.8)    |
| How do you feel are the benefits of the COVID-19 vaccine? (SA) – perceived benefits of a COVID-19 vaccine                                       |              |             |             | <0.001       |
| Very small                                                                                                                                      | 275 (1.6)    | 117 (1.2)   | 443 (13.4)  | 835 (2.8)    |
| Small                                                                                                                                           | 783 (4.6)    | 627 (6.4)   | 598 (18.1)  | 2008 (6.7)   |
| Medium                                                                                                                                          | 2674 (15.9)  | 5333 (54.0) | 1646 (49.7) | 9653 (32.1)  |
| Large                                                                                                                                           | 10417 (61.8) | 3493 (35.4) | 517 (15.6)  | 14427 (48.0) |
| Very large                                                                                                                                      | 2720 (16.1)  | 304 (3.1)   | 106 (3.2)   | 3130 (10.4)  |
| Do you think getting a COVID-19 vaccine will ease your anxiety? (SA) – perceived benefits of a COVID-19 vaccine                                 |              |             |             | <0.001       |
| Strongly disagree                                                                                                                               | 159 (0.9)    | 353 (.6)    | 850 (25.7)  | 1362 (4.5)   |
| Disagree                                                                                                                                        | 1360 (8.1)   | 2195 (22.2) | 1046 (31.6) | 4601 (15.3)  |
| Neither agree nor disagree                                                                                                                      | 4116 (24.4)  | 4978 (50.4) | 1066 (32.2) | 10160 (33.8) |
| Agree                                                                                                                                           | 9979 (59.2)  | 2240 (22.7) | 313 (9.5)   | 12532 (41.7) |
| Strongly agree                                                                                                                                  | 1255 (7.4)   | 108 (1.1)   | 35 (1.1)    | 1398 (4.7)   |
| If others have been vaccinated against COVID-19, do you think you should be vaccinated as well? (SA) – perceived norms about a COVID-19 vaccine |              |             |             | <0.001       |
| Strongly disagree                                                                                                                               | 136 (0.8)    | 147 (1.5)   | 889 (26.9)  | 1172 (3.9)   |
| Disagree                                                                                                                                        | 665 (3.9)    | 1255 (12.7) | 1136 (34.3) | 3056 (10.2)  |
| Neither agree nor disagree                                                                                                                      | 2346 (13.9)  | 5462 (55.3) | 1063 (32.1) | 8871 (29.5)  |
| Agree                                                                                                                                           | 10150 (60.2) | 2891 (29.3) | 194 (5.9)   | 13235 (44.0) |
| Strongly agree                                                                                                                                  | 3572 (21.2)  | 119 (1.2)   | 28 (0.8)    | 3719 (12.4)  |
| Do you trust scientists in the field of vaccine development for COVID-19? (SA) – trusts about COVID-19 vaccine                                  |              |             |             | <0.001       |
| Strongly distrust                                                                                                                               | 74 (0.4)     | 117 (1.2)   | 439 (13.3)  | 630 (2.1)    |
| Distrust                                                                                                                                        | 409 (2.4)    | 705 (7.1)   | 653 (19.7)  | 1767 (5.9)   |
| Neutral                                                                                                                                         | 4007 (23.8)  | 5935 (60.1) | 1640 (49.5) | 11582 (38.5) |
| Trust                                                                                                                                           | 11236 (66.6) | 2982 (30.2) | 533 (16.1)  | 14751 (49.1) |
| Strongly trust                                                                                                                                  | 1143 (6.8)   | 135 (1.4)   | 45 (1.4)    | 1323 (4.4)   |
| Do you trust the public authorities to approve vaccines for COVID-19? (SA) – trusts about COVID-19 vaccine                                      |              |             |             | <0.001       |
| Strongly distrust                                                                                                                               | 125 (0.7)    | 286 (2.9)   | 639 (19.3)  | 1050 (3.5)   |
| Distrust                                                                                                                                        | 768 (4.6)    | 1414 (14.3) | 838 (25.3)  | 3020 (10.0)  |
| Neutral                                                                                                                                         | 4884 (29.0)  | 5804 (58.8) | 1407 (42.5) | 12095 (40.2) |
| Trust                                                                                                                                           | 10265 (60.9) | 2267 (23.0) | 392 (11.8)  | 12924 (43.0) |
| Strongly trust                                                                                                                                  | 827 (4.9)    | 103 (1.0)   | 34 (1.0)    | 964 (3.2)    |

|                                                                                                                                          |              |             |             |              |
|------------------------------------------------------------------------------------------------------------------------------------------|--------------|-------------|-------------|--------------|
| Do you trust your healthcare provider about vaccination against COVID-19? (SA) – trusts about COVID-19 vaccine                           |              |             |             | <0.001       |
| Strongly distrust                                                                                                                        | 55 (0.3)     | 108 (1.1)   | 385 (11.6)  | 548 (1.8)    |
| Distrust                                                                                                                                 | 288 (1.7)    | 487 (4.9)   | 528 (16.0)  | 1303 (4.3)   |
| Neutral                                                                                                                                  | 2548 (15.1)  | 4632 (46.9) | 1567 (47.3) | 8747 (29.1)  |
| Trust                                                                                                                                    | 12264 (72.7) | 4373 (44.3) | 750 (22.7)  | 17387 (57.9) |
| Strongly trust                                                                                                                           | 1714 (10.2)  | 274 (2.8)   | 80 (2.4)    | 2068 (6.9)   |
| Do you think that healthcare workers and employees of elderly care facilities should be vaccinated? (SA) – belief about COVID-19 vaccine |              |             |             | <0.001       |
| Yes                                                                                                                                      | 15745 (93.3) | 6023 (61.0) | 1149 (34.7) | 22917 (76.3) |
| No                                                                                                                                       | 199 (1.2)    | 279 (2.8)   | 682 (20.6)  | 1160 (3.9)   |
| Can't say either                                                                                                                         | 925 (5.5)    | 3572 (36.2) | 1479 (44.7) | 5976 (19.9)  |
| Do you receive an influenza vaccine? (SA)                                                                                                |              |             |             | <0.001       |
| Every year                                                                                                                               | 8280 (49.1)  | 2362 (23.9) | 432 (13.1)  | 11074 (36.8) |
| Every few years                                                                                                                          | 3368 (20.0)  | 1700 (17.2) | 419 (12.7)  | 5487 (18.3)  |
| Rarely or never                                                                                                                          | 5221 (31.0)  | 5812 (58.9) | 2459 (74.3) | 13492 (44.9) |
| Did you receive on routine immunization? (SA)                                                                                            |              |             |             | <0.001       |
| All                                                                                                                                      | 4664 (27.6)  | 1321 (13.4) | 300 (9.1)   | 6285 (20.9)  |
| Partially                                                                                                                                | 3660 (21.7)  | 1349 (13.7) | 380 (11.5)  | 5389 (17.9)  |
| None                                                                                                                                     | 5408 (32.1)  | 4826 (48.9) | 2107 (63.7) | 12341 (41.1) |
| Not sure                                                                                                                                 | 3137 (18.6)  | 2378 (24.1) | 523 (15.8)  | 6038 (20.1)  |

- 1 SA: single-answer questions; MA: multiple-answer question; \* Statistical significance disappeared after Bonferroni
- 2 correction for multiple testing

# Supplementary Table 2: Sociodemographic, health-related, and psychological characteristics of the study participants by three COVID-19 vaccine intention groups and by Groups (A–D)

|                                         | Group (A) elderly with underlying diseases |                     |              |         | Group (B) elderly without underlying diseases |                |                     |               | Group (C) younger adults with underlying diseases |                   |                 |                     | Group (D) younger adults without underlying diseases |             |                   |                 |                      |                |             |                    |
|-----------------------------------------|--------------------------------------------|---------------------|--------------|---------|-----------------------------------------------|----------------|---------------------|---------------|---------------------------------------------------|-------------------|-----------------|---------------------|------------------------------------------------------|-------------|-------------------|-----------------|----------------------|----------------|-------------|--------------------|
|                                         | Yes<br>N = 1535                            | Not sure<br>N = 571 | No<br>N = 80 | P-value | Total<br>N = 1986                             | Yes<br>N = 661 | Not sure<br>N = 551 | No<br>N = 364 | P-value                                           | Total<br>N = 6636 | Yes<br>N = 1276 | Not sure<br>N = 590 | No<br>N = 225                                        | P-value     | Total<br>N = 1991 | Yes<br>N = 9497 | Not sure<br>N = 7802 | No<br>N = 2641 | P-value     | Total<br>N = 19440 |
| <b>Sociodemographic characteristics</b> |                                            |                     |              |         |                                               |                |                     |               |                                                   |                   |                 |                     |                                                      |             |                   |                 |                      |                |             |                    |
| Gender (SA)                             |                                            |                     |              |         |                                               |                |                     |               |                                                   |                   |                 |                     |                                                      |             |                   |                 |                      |                |             |                    |
| Women                                   | 512 (33.4)                                 | 182 (49.1)          | 43 (53.8)    | <0.001  | 737 (37.1)                                    | 2517 (54.0)    | 1085 (67.3)         | 221 (60.7)    | <0.001                                            | 3823 (57.6)       | 471 (40.1)      | 334 (56.6)          | 118 (52.4)                                           | <0.001      | 923 (46.4)        | 4633 (48.8)     | 4176 (57.2)          | 1298 (49.1)    | <0.001      | 10107 (52.0)       |
| Men                                     | 1019 (66.4)                                | 189 (50.9)          | 37 (46.2)    |         | 1245 (62.7)                                   | 2143 (84.0)    | 523 (22.5)          | 141 (38.7)    |                                                   | 2807 (42.3)       | 704 (59.9)      | 253 (42.9)          |                                                      | 1063 (53.4) | 4833 (51.2)       | 3109 (42.6)     | 1333 (50.5)          |                | 9295 (47.8) |                    |
| Other                                   | 4 (0.3)                                    | 0 (0.0)             | 0 (0.0)      |         | 4 (0.2)                                       | 1 (0.0)        | 3 (0.2)             | 2 (0.5)       |                                                   | 6 (0.1)           | 1 (0.1)         | 3 (0.5)             |                                                      | 5 (0.3)     | 11 (0.1)          | 17 (0.2)        | 10 (0.4)             |                | 38 (0.2)    |                    |
| Prefecture (SA)                         |                                            |                     |              | 0.195   |                                               |                |                     |               | 0.269                                             |                   |                 |                     |                                                      | 0.129       |                   |                 |                      |                | 0.015       |                    |
| Hokkaido                                | 91 (5.9)                                   | 27 (7.3)            | 6 (7.5)      |         | 124 (6.2)                                     | 282 (6.1)      | 108 (7.7)           | 24 (6.6)      |                                                   | 414 (6.2)         | 75 (6.4)        | 41 (6.9)            |                                                      | 12 (5.3)    | 128 (6.4)         | 467 (4.9)       | 378 (5.2)            |                | 125 (4.7)   | 970 (5.0)          |
| Aomori                                  | 11 (0.7)                                   | 3 (0.8)             | 0 (0.0)      |         | 14 (0.7)                                      | 33 (0.7)       | 9 (0.6)             | 5 (1.4)       |                                                   | 47 (0.7)          | 12 (1.0)        | 5 (0.8)             |                                                      | 20 (1.0)    | 90 (0.9)          | 63 (0.9)        | 30 (1.1)             |                | 183 (0.9)   |                    |
| Iwate                                   | 6 (0.4)                                    | 2 (0.5)             | 0 (0.0)      |         | 8 (0.4)                                       | 31 (0.7)       | 11 (0.7)            | 6 (1.6)       |                                                   | 48 (0.7)          | 10 (0.9)        | 10 (1.7)            |                                                      | 23 (1.2)    | 99 (1.0)          | 62 (0.8)        | 18 (0.7)             |                | 179 (0.9)   |                    |
| Miyagi                                  | 33 (2.1)                                   | 7 (1.9)             | 3 (3.8)      |         | 43 (2.2)                                      | 94 (2.0)       | 18 (1.1)            | 6 (1.6)       |                                                   | 118 (1.8)         | 28 (2.4)        | 19 (3.2)            |                                                      | 55 (2.8)    | 193 (2.0)         | 144 (2.0)       | 42 (1.6)             |                | 379 (1.9)   |                    |
| Akita                                   | 13 (0.8)                                   | 3 (0.8)             | 0 (0.0)      |         | 16 (0.8)                                      | 15 (0.3)       | 7 (0.4)             | 4 (1.1)       |                                                   | 26 (0.4)          | 12 (1.0)        | 5 (0.8)             |                                                      | 18 (0.9)    | 75 (0.8)          | 52 (0.7)        | 15 (0.6)             |                | 142 (0.7)   |                    |
| Yamagata                                | 15 (1.0)                                   | 3 (0.8)             | 0 (0.0)      |         | 18 (0.9)                                      | 29 (0.6)       | 11 (0.7)            | 2 (0.5)       |                                                   | 42 (0.6)          | 13 (1.1)        | 3 (0.5)             |                                                      | 18 (0.9)    | 73 (0.8)          | 47 (0.6)        | 14 (0.5)             |                | 134 (0.7)   |                    |
| Fukushima                               | 18 (1.2)                                   | 2 (0.5)             | 1 (1.3)      |         | 21 (1.1)                                      | 41 (0.9)       | 9 (0.6)             | 3 (0.8)       |                                                   | 60 (0.9)          | 13 (1.1)        | 7 (1.2)             |                                                      | 21 (1.0)    | 117 (1.2)         | 61 (0.8)        | 26 (1.0)             |                | 205 (1.2)   |                    |
| Ibaraki                                 | 22 (1.4)                                   | 6 (1.6)             | 0 (0.0)      |         | 28 (1.4)                                      | 70 (1.5)       | 21 (1.3)            | 4 (1.1)       |                                                   | 95 (1.4)          | 21 (1.8)        | 12 (2.0)            |                                                      | 33 (1.6)    | 164 (1.7)         | 104 (1.4)       | 46 (1.7)             |                | 320 (1.7)   |                    |
| Tochigi                                 | 14 (0.9)                                   | 0 (0.0)             | 0 (0.0)      |         | 14 (0.7)                                      | 36 (0.8)       | 16 (1.0)            | 1 (0.3)       |                                                   | 53 (0.8)          | 15 (1.3)        | 5 (0.8)             |                                                      | 26 (1.3)    | 107 (1.1)         | 86 (1.2)        | 22 (0.8)             |                | 215 (1.1)   |                    |
| Gunma                                   | 21 (1.4)                                   | 3 (0.8)             | 0 (0.0)      |         | 24 (1.2)                                      | 25 (0.5)       | 15 (0.9)            | 3 (0.8)       |                                                   | 43 (0.6)          | 19 (1.6)        | 4 (0.7)             |                                                      | 2 (0.9)     | 103 (1.1)         | 65 (0.9)        | 26 (1.0)             |                | 194 (1.0)   |                    |
| Saitama                                 | 78 (5.1)                                   | 22 (5.9)            | 3 (3.8)      |         | 103 (5.2)                                     | 234 (5.0)      | 94 (5.8)            | 18 (4.9)      |                                                   | 346 (5.2)         | 53 (4.5)        | 29 (4.9)            |                                                      | 12 (5.3)    | 493 (5.2)         | 401 (5.5)       | 144 (5.5)            |                | 1038 (5.3)  |                    |
| Chiba                                   | 87 (5.7)                                   | 24 (6.5)            | 5 (6.3)      |         | 116 (5.8)                                     | 247 (5.3)      | 79 (4.9)            | 15 (4.2)      |                                                   | 345 (5.2)         | 52 (4.4)        | 23 (3.9)            |                                                      | 9 (4.0)     | 418 (4.2)         | 336 (4.6)       | 96 (4.4)             |                | 848 (4.4)   |                    |
| Tokyo                                   | 150 (9.8)                                  | 36 (9.7)            | 11 (13.8)    |         | 197 (9.9)                                     | 508 (10.9)     | 167 (10.4)          | 47 (12.9)     |                                                   | 722 (10.9)        | 129 (11.0)      | 59 (10.0)           |                                                      | 33 (14.7)   | 1279 (13.7)       | 890 (12.6)      | 374 (14.2)           |                | 2521 (13.0) |                    |
| Kanagawa                                | 121 (7.9)                                  | 30 (8.1)            | 6 (7.5)      |         | 157 (7.9)                                     | 423 (9.1)      | 143 (8.9)           | 24 (6.6)      |                                                   | 590 (8.9)         | 91 (7.7)        | 36 (6.1)            |                                                      | 13 (5.9)    | 723 (7.6)         | 593 (8.1)       | 153 (5.8)            |                | 1531 (7.9)  |                    |
| Niigata                                 | 39 (2.5)                                   | 5 (1.3)             | 2 (2.5)      |         | 46 (2.3)                                      | 80 (1.7)       | 28 (1.7)            | 3 (0.8)       |                                                   | 111 (1.7)         | 25 (2.1)        | 7 (1.2)             |                                                      | 3 (1.3)     | 221 (2.3)         | 151 (2.1)       | 31 (1.2)             |                | 403 (2.1)   |                    |
| Toyota                                  | 12 (0.8)                                   | 3 (0.8)             | 0 (0.0)      |         | 15 (0.8)                                      | 47 (1.0)       | 13 (0.8)            | 1 (0.3)       |                                                   | 61 (0.9)          | 11 (0.9)        | 6 (1.0)             |                                                      | 1 (0.5)     | 18 (0.9)          | 87 (0.9)        | 27 (1.0)             |                | 167 (0.9)   |                    |
| Ishikawa                                | 14 (0.9)                                   | 1 (0.3)             | 0 (0.0)      |         | 15 (0.8)                                      | 45 (1.0)       | 15 (0.9)            | 1 (0.3)       |                                                   | 61 (0.9)          | 14 (1.2)        | 7 (1.2)             |                                                      | 2 (0.9)     | 23 (1.2)          | 95 (1.0)        | 57 (0.8)             |                | 175 (0.9)   |                    |
| Fukui                                   | 11 (0.7)                                   | 3 (0.8)             | 0 (0.0)      |         | 14 (0.7)                                      | 24 (0.5)       | 12 (0.7)            | 1 (0.3)       |                                                   | 37 (0.6)          | 7 (0.6)         | 3 (0.5)             |                                                      | 1 (0.5)     | 44 (0.5)          | 43 (0.6)        | 23 (0.9)             |                | 98 (0.5)    |                    |
| Yamanashi                               | 15 (1.0)                                   | 0 (0.0)             | 0 (0.0)      |         | 15 (0.8)                                      | 33 (0.7)       | 14 (0.9)            | 2 (0.5)       |                                                   | 49 (0.7)          | 4 (0.3)         | 1 (0.2)             |                                                      | 2 (0.9)     | 7 (0.4)           | 36 (0.5)        | 22 (0.8)             |                | 110 (0.6)   |                    |
| Nagano                                  | 20 (1.3)                                   | 10 (2.7)            | 2 (2.5)      |         | 32 (1.6)                                      | 79 (1.6)       | 30 (1.9)            | 12 (3.3)      |                                                   | 117 (1.8)         | 16 (1.4)        | 16 (2.7)            |                                                      | 3 (1.3)     | 35 (0.8)          | 150 (1.6)       | 130 (1.8)            |                | 321 (1.7)   |                    |
| Gifu                                    | 30 (1.9)                                   | 3 (0.8)             | 2 (1.3)      |         | 35 (1.7)                                      | 60 (1.3)       | 21 (1.3)            | 2 (0.5)       |                                                   | 83 (1.3)          | 16 (1.4)        | 11 (1.9)            |                                                      | 3 (1.3)     | 90 (1.5)          | 122 (1.6)       | 94 (1.3)             |                | 203 (1.3)   |                    |
| Shizuoka                                | 40 (2.6)                                   | 9 (2.4)             | 0 (0.0)      |         | 49 (2.5)                                      | 114 (2.4)      | 44 (2.7)            | 11 (3.0)      |                                                   | 169 (2.5)         | 27 (2.3)        | 16 (2.7)            |                                                      | 2 (0.9)     | 45 (2.3)          | 222 (2.3)       | 172 (2.4)            |                | 447 (2.3)   |                    |
| Aichi                                   | 105 (6.8)                                  | 18 (4.9)            | 7 (8.8)      |         | 130 (6.5)                                     | 325 (7.0)      | 78 (4.8)            | 17 (4.7)      |                                                   | 420 (6.3)         | 92 (7.8)        | 31 (5.3)            |                                                      | 11 (4.9)    | 134 (6.7)         | 625 (6.6)       | 494 (6.8)            |                | 1309 (6.7)  |                    |
| Mie                                     | 9 (0.6)                                    | 1 (0.3)             | 3 (3.8)      |         | 13 (0.7)                                      | 70 (1.5)       | 19 (1.2)            | 4 (1.1)       |                                                   | 93 (1.4)          | 24 (2.0)        | 9 (1.5)             |                                                      | 2 (0.9)     | 35 (1.4)          | 134 (1.4)       | 105 (1.4)            |                | 265 (1.4)   |                    |
| Shiga                                   | 11 (0.7)                                   | 8 (2.2)             | 0 (0.0)      |         | 19 (1.0)                                      | 35 (0.8)       | 13 (0.8)            | 4 (1.1)       |                                                   | 52 (0.8)          | 10 (0.9)        | 5 (0.8)             |                                                      | 1 (0.4)     | 83 (0.9)          | 55 (0.8)        | 28 (1.1)             |                | 166 (0.9)   |                    |
| Kyoto                                   | 33 (2.1)                                   | 9 (2.4)             | 2 (2.5)      |         | 44 (2.2)                                      | 100 (2.1)      | 38 (2.4)            | 11 (3.0)      |                                                   | 149 (2.2)         | 17 (1.4)        | 10 (1.7)            |                                                      | 9 (4.0)     | 175 (1.8)         | 143 (2.0)       | 55 (2.1)             |                | 373 (1.9)   |                    |
| Osaka                                   | 103 (6.7)                                  | 36 (9.7)            | 4 (5.0)      |         | 143 (7.2)                                     | 367 (7.9)      | 25 (6.9)            | 5 (1.4)       |                                                   | 522 (7.9)         | 65 (5.6)        | 39 (6.6)            |                                                      | 12 (5.3)    | 117 (5.9)         | 638 (6.7)       | 555 (7.2)            |                | 1395 (7.2)  |                    |
| Hyogo                                   | 86 (5.6)                                   | 11 (3.0)            | 2 (2.5)      |         | 99 (5.0)                                      | 226 (4.8)      | 86 (5.3)            | 21 (5.8)      |                                                   | 333 (5.0)         | 46 (3.9)        | 20 (3.4)            |                                                      | 13 (5.8)    | 79 (4.0)          | 388 (4.6)       | 125 (4.7)            |                | 852 (4.4)   |                    |
| Nara                                    | 21 (1.4)                                   | 3 (0.8)             | 1 (1.3)      |         | 25 (1.3)                                      | 61 (1.3)       | 17 (1.1)            | 3 (0.8)       |                                                   | 81 (1.2)          | 9 (0.8)         | 7 (1.2)             |                                                      | 1 (0.4)     | 17 (0.9)          | 86 (0.9)        | 32 (1.2)             |                | 196 (1.0)   |                    |
| Wakayama                                | 8 (0.5)                                    | 2 (0.5)             | 1 (1.3)      |         | 11 (0.6)                                      | 17 (0.4)       | 7 (0.4)             | 3 (0.8)       |                                                   | 27 (0.4)          | 4 (0.3)         | 5 (0.8)             |                                                      | 0 (0.0)     | 49 (0.5)          | 26 (0.4)        | 10 (0.4)             |                | 85 (0.4)    |                    |
| Tottori                                 | 7 (0.5)                                    | 3 (0.8)             | 1 (1.3)      |         | 11 (0.6)                                      | 16 (0.3)       | 3 (0.2)             | 1 (0.3)       |                                                   | 20 (0.3)          | 5 (0.4)         | 2 (0.3)             |                                                      | 0 (0.0)     | 39 (0.4)          | 32 (0.4)        | 11 (0.4)             |                | 82 (0.4)    |                    |
| Shimane                                 | 13 (0.8)                                   | 1 (0.3)             | 0 (0.0)      |         | 14 (0.7)                                      | 19 (0.4)       | 6 (0.4)             | 1 (0.3)       |                                                   | 26 (0.4)          | 10 (0.9)        | 2 (0.3)             |                                                      | 0 (0.0)     | 38 (0.4)          | 32 (0.4)        | 5 (0.2)              |                | 83 (0.4)    |                    |
| Okayama                                 | 20 (1.4)                                   | 11 (2.9)            | 1 (1.3)      |         | 32 (1.6)                                      | 88 (1.9)       | 29 (1.8)            | 11 (3.0)      |                                                   | 119 (1.8)         | 14 (1.2)        | 7 (1.2)             |                                                      | 5 (2.2)     | 160 (1.7)         | 134 (1.8)       | 42 (1.6)             |                | 336 (1.7)   |                    |
| Hiroshima                               | 36 (2.3)                                   | 7 (1.8)             | 4 (5.0)      |         | 47 (2.3)                                      | 112 (2.4)      | 58 (3.6)            | 8 (2.2)       |                                                   | 178 (2.6)         | 31 (2.7)        | 18 (3.0)            |                                                      | 4 (1.8)     | 229 (2.3)         | 168 (2.3)       | 48 (1.8)             |                | 445 (2.3)   |                    |
| Yamaguchi                               | 15 (1.0)                                   | 3 (0.8)             | 1 (1.3)      |         | 19 (1.0)                                      | 42 (0.9)       | 14 (0.9)            | 2 (0.5)       |                                                   | 58 (0.9)          | 10 (0.9)        | 6 (1.0)             |                                                      | 1 (0.4)     | 17 (0.9)          | 64 (0.9)        | 21 (0.8)             |                | 174 (0.9)   |                    |
| Tokushima                               | 6 (0.4)                                    | 4 (1.1)             | 0 (0.0)      |         | 10 (0.5)                                      | 30 (0.6)       | 6 (0.4)             | 4 (1.1)       |                                                   | 40 (0.6)          | 4 (0.3)         | 8 (1.4)             |                                                      | 0 (0.0)     | 12 (0.6)          | 58 (0.6)        | 36 (0.5)             |                | 109 (0.6)   |                    |
| Kagawa                                  | 19 (1.2)                                   | 2 (0.5)             | 0 (0.0)      |         | 21 (1.1)                                      | 39 (0.8)       | 21 (1.3)            | 6 (1.6)       |                                                   | 66 (1.0)          | 13 (1.1)        | 5 (0.8)             |                                                      | 3 (1.3)     | 79 (0.8)          | 69 (0.8)        | 21 (0.8)             |                | 160 (0.8)   |                    |
| Ehime                                   | 18 (1.2)                                   | 3 (0.8)             | 1 (1.3)      |         | 22 (1.1)                                      | 51 (1.1)       | 17 (1.1)            | 3 (0.8)       |                                                   | 71 (1.1)          | 17 (1.4)        | 11 (1.9)            |                                                      | 5 (2.2)     | 106 (1.1)         | 91 (1.2)        | 32 (1.2)             |                | 229 (1.2)   |                    |
| Kochi                                   | 10 (0.7)                                   | 0 (0.0)             | 0 (0.0)      |         | 10 (0.5)                                      | 24 (0.5)       | 5 (0.3)             | 2 (0.5)       |                                                   | 31 (0.5)          | 3 (0.3)         | 4 (0.7)             |                                                      | 4 (1.8)     | 11 (0.6)          | 6 (0.4)         | 13 (0.5)             |                | 76 (0.4)    |                    |
| Fukuoka                                 | 77 (5.0)                                   | 17 (4.6)            | 4 (5.0)      |         | 98 (4.9)                                      | 238 (5.1)      | 96 (6.0)            | 18 (4.9)      |                                                   | 332 (5.3)         | 70 (6.0)        | 40 (6.7)            |                                                      | 17 (7.6)    | 479 (5.0)         | 397 (4.6)       | 135 (5.8)            |                | 1029 (5.3)  |                    |
| Saga                                    | 9 (0.6)                                    | 1 (0.3)             | 0 (0.0)      |         | 10 (0.5)                                      | 27 (0.6)       | 12 (0.7)            | 4 (1.1)       |                                                   | 43 (0.6)          | 4 (0.3)         | 1 (0.2)             |                                                      | 0 (0.0)     | 5 (0.3)           | 47 (0.6)        | 11 (0.4)             |                | 112 (0.6)   |                    |
| Nagasaki                                | 13 (0.8)                                   | 2 (0.5)             | 0 (0.0)      |         | 15 (0.8)                                      | 50 (1.1)       | 12 (0.7)            | 5 (1.4)       |                                                   | 67 (1.0)          | 15 (1.3)        | 5 (0.8)             |                                                      | 2 (0.9)     | 83 (0.9)          | 83 (1.1)        | 24 (0.9)             |                | 190 (1.0)   |                    |
| Kumamoto                                | 19 (1.2)                                   | 6 (1.6)             | 3 (3.8)      |         | 28 (1.4)                                      | 54 (1.2)       | 12 (0.7)            | 4 (1.1)       |                                                   | 70 (1.1)          | 20 (1.7)        | 5 (0.8)             |                                                      | 1 (0.4)     | 26 (1.3)          | 130 (1.4)       | 92 (1.3)             |                | 252 (1.3)   |                    |
| Oita                                    | 18 (1.2)                                   | 3 (0.8)             | 1 (1.3)      |         | 22 (1.1)                                      | 31 (0.7)       | 8 (0.5)             | 2 (0.5)       |                                                   | 41 (0.6)          | 6 (0.5)         | 7 (1.2)             |                                                      | 1 (0.4)     | 14 (0.7)          | 74 (0.8)        | 55 (0.8)             |                | 148 (0.8)   |                    |
| Miyazaki                                | 12 (0.8)                                   | 4 (1.1)             | 0 (0.0)      |         | 16 (0.8)                                      | 27 (0.6)       | 9 (0.6)             | 0 (0.0)       |                                                   | 36 (0.5)          | 13 (1.1)        | 9 (1.5)             |                                                      | 0 (0.0)     | 22 (1.1)          | 57 (0.6)        | 49 (0.7)             |                | 126 (0.6)   |                    |
| Kagoshima                               | 11 (0.7)                                   | 5 (0.8)             | 1 (1.3)      |         | 15 (0.8)                                      | 42 (0.9)       | 18 (1.1)            | 4 (1.1)       |                                                   | 64 (1.0)          | 12 (1.0)        | 5 (0.8)             |                                                      | 4 (1.8)     | 21 (1.1)          | 50 (0.7)        | 29 (1.1)             |                | 186 (1.0)   |                    |
| Okinawa                                 | 1 (0.1)                                    | 0 (0.0)             | 1 (1.3)      |         | 2 (0.1)                                       | 19 (0.4)       | 9 (0.6)             | 2 (0.5)       |                                                   | 30 (0.5)          | 8 (0.7)         | 10 (1.7)            |                                                      | 3 (1.3)     | 78 (0.8)          | 83 (1.1)        | 25 (0.9)             |                | 186 (1.0)   |                    |
| Highest educational level (SA)          |                                            |                     |              |         |                                               |                |                     |               |                                                   |                   |                 |                     |                                                      |             |                   |                 |                      |                |             |                    |
| Middle school                           | 52 (3.4)                                   | 21 (5.7)            | 3 (3.8)      | <0.001  | 76 (3.8)                                      | 127 (2.7)      | 93 (5.8)            | 23 (6.3)      | <0.001                                            | 243 (3.7)         | 30 (2.6)        | 22 (3.7)            |                                                      | 9 (4.0)     | 61 (3.1)          | 135 (1.4)       | 240 (3.2)            |                | 89 (3.4)    | 464 (2.4)          |
| High school                             | 618 (40.3)                                 | 163 (43.9)          | 38 (47.5)    |         | 819 (41.2)                                    | 1889 (42.7)    | 735 (45.6)          | 148 (40.7)    |                                                   | 2872 (43.3)       | 347 (29.5)      | 229 (38.1)          |                                                      | 79 (35.1)   | 655 (6.9)         | 2549 (26.8)     | 2448 (33.5)          |                | 831 (41.5)  | 5828 (30.0)        |
| Junior college                          | 162 (10.6)                                 | 56 (15.1)           | 17 (21.3)    |         | 235 (11.8)                                    | 761 (16.3)     | 300 (18.6)          | 46 (17.4)     |                                                   | 1125 (17.0)       | 231 (19.6)      | 46 (20.4)           |                                                      | 406 (20.4)  | 1976 (20.8)       | 1400 (19.5)     | 4067 (20.9)          |                |             |                    |

|                                                                                                                                                                      |              |             |            |        |              |             |             |            |             |              |             |             |             |              |             |             |              |              |              |              |
|----------------------------------------------------------------------------------------------------------------------------------------------------------------------|--------------|-------------|------------|--------|--------------|-------------|-------------|------------|-------------|--------------|-------------|-------------|-------------|--------------|-------------|-------------|--------------|--------------|--------------|--------------|
| [6-7]                                                                                                                                                                | 94 (6.1)     | 11 (3.0)    | 4 (5.0)    |        | 109 (5.5)    | 224 (4.8)   | 73 (4.5)    | 13 (3.6)   | 310 (4.7)   | 91 (7.7)     | 52 (8.8)    | 18 (8.0)    | 161 (8.1)   | 886 (9.3)    | 580 (7.9)   | 223 (8.4)   | 1688 (8.7)   |              |              |              |
| [7-8]                                                                                                                                                                | 51 (3.3)     | 13 (3.5)    | 4 (5.0)    |        | 205 (4.4)    | 58 (3.4)    | 58 (3.4)    | 12 (3.3)   | 275 (4.1)   | 88 (7.5)     | 27 (4.6)    | 19 (8.4)    | 134 (6.7)   | 805 (8.5)    | 513 (7.0)   | 183 (6.9)   | 1501 (7.7)   |              |              |              |
| [8-9]                                                                                                                                                                | 47 (3.1)     | 5 (1.3)     | 1 (1.3)    |        | 53 (2.7)     | 113 (2.4)   | 31 (1.9)    | 4 (1.1)    | 148 (2.2)   | 62 (5.3)     | 15 (2.5)    | 7 (3.1)     | 84 (4.2)    | 601 (6.3)    | 313 (4.0)   | 118 (4.5)   | 1032 (5.3)   |              |              |              |
| [9-10]                                                                                                                                                               | 40 (2.6)     | 5 (1.3)     | 2 (2.5)    |        | 47 (2.4)     | 119 (2.6)   | 27 (1.7)    | 13 (3.6)   | 149 (2.4)   | 58 (4.9)     | 24 (4.1)    | 11 (4.9)    | 542 (5.7)   | 292 (4.0)    | 232 (4.6)   | 96 (4.8)    | 930 (4.8)    |              |              |              |
| [10-]                                                                                                                                                                | 85 (5.5)     | 16 (4.3)    | 3 (3.8)    |        | 104 (5.2)    | 249 (5.3)   | 58 (3.6)    | 28 (7.9)   | 325 (4.9)   | 150 (12.8)   | 45 (7.6)    | 14 (6.2)    | 219 (10.5)  | 1242 (13.1)  | 632 (8.7)   | 245 (9.3)   | 2119 (10.9)  |              |              |              |
| Household size including respondent (SA)                                                                                                                             |              |             |            | <0.001 |              |             |             |            |             |              |             |             |             |              |             |             |              |              |              |              |
| 1                                                                                                                                                                    | 203 (13.2)   | 71 (19.1)   | 22 (27.5)  |        | 296 (14.9)   | 647 (13.9)  | 344 (21.4)  | 93 (25.3)  | 1008 (16.3) | 199 (16.9)   | 124 (21.0)  | 46 (20.0)   | 309 (18.5)  | 1729 (18.2)  | 1490 (20.4) | 691 (26.3)  | 3919 (20.1)  |              |              |              |
| 2                                                                                                                                                                    | 943 (61.4)   | 197 (53.1)  | 31 (38.8)  |        | 1171 (59.0)  | 2853 (61.2) | 877 (54.4)  | 203 (55.8) | 3933 (59.3) | 391 (32.2)   | 182 (30.0)  | 45 (24.4)   | 275 (28.0)  | 1973 (27.0)  | 1973 (27.0) | 486 (26.0)  | 5374 (27.6)  |              |              |              |
| 3                                                                                                                                                                    | 268 (17.5)   | 68 (18.3)   | 19 (23.8)  |        | 355 (17.9)   | 808 (17.3)  | 248 (15.4)  | 52 (14.3)  | 1108 (16.7) | 299 (25.4)   | 146 (24.7)  | 55 (25.9)   | 2468 (26.0) | 1463 (25.1)  | 1463 (25.1) | 503 (25.9)  | 5038 (25.9)  |              |              |              |
| 4                                                                                                                                                                    | 72 (4.7)     | 21 (5.7)    | 7 (8.8)    |        | 100 (5.0)    | 219 (4.7)   | 97 (6.0)    | 5 (1.4)    | 321 (4.8)   | 199 (16.9)   | 87 (16.4)   | 22 (9.8)    | 318 (16.0)  | 1820 (19.2)  | 1369 (18.7) | 424 (16.1)  | 3613 (18.6)  |              |              |              |
| 5                                                                                                                                                                    | 24 (1.6)     | 3 (1.6)     | 0 (0.0)    |        | 31 (1.6)     | 68 (1.5)    | 19 (1.2)    | 6 (1.6)    | 93 (1.4)    | 50 (4.3)     | 32 (5.4)    | 9 (4.0)     | 573 (6.0)   | 389 (3.3)    | 131 (5.0)   | 1093 (5.6)  | 1093 (5.6)   |              |              |              |
| More than 6                                                                                                                                                          | 25 (1.6)     | 7 (1.9)     | 1 (1.3)    |        | 33 (1.7)     | 66 (1.4)    | 26 (1.6)    | 6 (1.6)    | 98 (1.5)    | 38 (3.2)     | 9 (1.5)     | 6 (2.7)     | 192 (2.0)   | 174 (2.4)    | 46 (1.7)    | 412 (2.1)   | 412 (2.1)    |              |              |              |
| Marital size (SA)                                                                                                                                                    |              |             |            | <0.001 |              |             |             |            |             |              |             |             |             |              |             |             |              |              |              |              |
| Married (including de facto marriage)                                                                                                                                | 1261 (82.1)  | 264 (71.2)  | 54 (67.5)  |        | 1579 (79.5)  | 3697 (79.3) | 1071 (66.5) | 223 (61.3) | 4991 (75.2) | 717 (61.0)   | 318 (53.9)  | 104 (46.2)  | 1139 (57.2) | 5653 (59.5)  | 3591 (49.2) | 1112 (42.1) | 10356 (53.3) |              |              |              |
| Not married (without partner)                                                                                                                                        | 63 (4.1)     | 24 (6.5)    | 5 (6.3)    |        | 180 (3.9)    | 326 (24.6)  | 123 (7.6)   | 36 (9.9)   | 173 (25.1)  | 286 (24.3)   | 173 (29.3)  | 76 (33.8)   | 2491 (26.2) | 2491 (26.2)  | 535 (26.9)  | 6155 (31.7) | 1080 (40.9)  |              |              |              |
| Not married (with a partner)                                                                                                                                         | 4 (0.3)      | 2 (0.5)     | 1 (1.3)    |        | 7 (0.4)      | 12 (0.3)    | 8 (0.5)     | 5 (1.4)    | 25 (0.4)    | 29 (0.9)     | 20 (8.9)    | 12 (5.4)    | 702 (7.4)   | 478 (2.4)    | 593 (8.1)   | 278 (10.5)  | 1573 (8.1)   |              |              |              |
| Widowed                                                                                                                                                              | 124 (8.1)    | 59 (15.9)   | 11 (13.8)  |        | 194 (9.8)    | 459 (9.8)   | 232 (14.4)  | 49 (13.5)  | 740 (11.2)  | 18 (1.5)     | 12 (2.0)    | 3 (1.3)     | 112 (1.2)   | 72 (2.4)     | 33 (1.7)    | 21 (0.8)    | 211 (1.1)    |              |              |              |
| Divorced                                                                                                                                                             | 83 (5.4)     | 22 (5.9)    | 9 (11.3)   |        | 114 (5.7)    | 313 (6.7)   | 177 (11.0)  | 51 (14.0)  | 331 (4.9)   | 176 (6.5)    | 58 (9.8)    | 22 (9.8)    | 539 (5.7)   | 22 (9.8)     | 156 (7.8)   | 437 (6.0)   | 1145 (5.9)   |              |              |              |
| To what extent did the COVID-19 pandemic affect your life, within the past year? (SA)                                                                                |              |             |            | 0.110  |              |             |             |            |             |              |             |             |             |              |             |             |              |              |              |              |
| Not at all                                                                                                                                                           | 61 (4.0)     | 22 (5.9)    | 8 (10.0)   |        | 91 (4.4)     | 179 (3.8)   | 88 (5.4)    | 59 (16.2)  | 336 (4.9)   | 80 (6.8)     | 31 (5.3)    | 38 (16.9)   | 149 (17.5)  | 467 (4.9)    | 459 (6.0)   | 423 (16.6)  | 1342 (6.8)   |              |              |              |
| Not much                                                                                                                                                             | 393 (25.6)   | 92 (24.8)   | 21 (26.3)  |        | 506 (25.5)   | 1298 (27.8) | 480 (29.8)  | 131 (33.2) | 1899 (28.6) | 304 (25.9)   | 138 (23.4)  | 69 (30.7)   | 2298 (24.2) | 1934 (20.5)  | 756 (29.0)  | 4998 (25.7) | 4998 (25.7)  |              |              |              |
| Somewhat                                                                                                                                                             | 824 (53.7)   | 204 (55.0)  | 42 (52.5)  |        | 1070 (51.9)  | 2609 (56.0) | 859 (53.3)  | 149 (40.9) | 3637 (54.5) | 553 (47.0)   | 290 (49.2)  | 79 (35.1)   | 922 (46.3)  | 4975 (52.4)  | 322 (46.3)  | 1043 (39.5) | 1178 (50.0)  |              |              |              |
| Quite a lot                                                                                                                                                          | 257 (16.7)   | 53 (14.3)   | 9 (11.3)   |        | 319 (16.1)   | 575 (12.3)  | 184 (11.4)  | 35 (9.6)   | 794 (12.0)  | 239 (20.3)   | 131 (22.2)  | 39 (17.3)   | 409 (20.5)  | 1757 (18.5)  | 1229 (16.8) | 409 (15.5)  | 3395 (17.5)  |              |              |              |
| Health-related characteristics, including health literacy                                                                                                            |              |             |            |        |              |             |             |            |             |              |             |             |             |              |             |             |              |              |              |              |
| Self-reported health status (SA)                                                                                                                                     |              |             |            | <0.001 |              |             |             |            |             |              |             |             |             |              |             |             |              |              |              |              |
| Very good                                                                                                                                                            | 154 (10.0)   | 21 (7.7)    | 8 (10.0)   |        | 183 (9.2)    | 1254 (26.9) | 361 (22.4)  | 127 (34.9) | 1742 (26.3) | 220 (17.7)   | 67 (11.4)   | 33 (14.7)   | 320 (16.1)  | 3380 (35.6)  | 2137 (29.3) | 907 (34.3)  | 6424 (33.0)  |              |              |              |
| Good                                                                                                                                                                 | 449 (29.3)   | 92 (24.8)   | 22 (27.5)  |        | 563 (28.3)   | 1665 (35.7) | 521 (32.3)  | 113 (31.0) | 2299 (34.6) | 303 (25.8)   | 120 (33.2)  | 55 (24.4)   | 478 (24.0)  | 3006 (31.7)  | 2080 (28.5) | 685 (25.9)  | 5771 (29.7)  |              |              |              |
| Fair                                                                                                                                                                 | 553 (36.0)   | 109 (29.1)  | 20 (25.0)  |        | 1363 (39.2)  | 3382 (73.4) | 538 (33.4)  | 90 (24.7)  | 1991 (30.0) | 328 (27.6)   | 109 (32.4)  | 581 (29.2)  | 2284 (24.0) | 4495 (47.5)  | 489 (26.4)  | 5288 (27.2) | 749 (34.9)   |              |              |              |
| Poor                                                                                                                                                                 | 310 (20.2)   | 111 (29.9)  | 23 (28.8)  |        | 444 (22.4)   | 348 (7.5)   | 163 (10.1)  | 26 (7.1)   | 537 (8.1)   | 248 (21.1)   | 154 (26.1)  | 47 (20.9)   | 174 (7.5)   | 659 (6.9)    | 228 (8.6)   | 1601 (8.2)  | 2021 (11.2)  |              |              |              |
| Very poor                                                                                                                                                            | 69 (4.5)     | 28 (7.5)    | 7 (8.8)    |        | 104 (5.2)    | 31 (0.7)    | 28 (1.7)    | 8 (2.2)    | 67 (1.0)    | 77 (6.5)     | 58 (9.8)    | 28 (12.4)   | 113 (1.2)   | 171 (1.3)    | 72 (2.7)    | 356 (1.8)   | 356 (1.8)    |              |              |              |
| Have you ever received a COVID-19 test? (MA)                                                                                                                         |              |             |            |        |              |             |             |            |             |              |             |             |             |              |             |             |              |              |              |              |
| Yes                                                                                                                                                                  | 1413 (92.1)  | 346 (93.3)  | 70 (87.5)  | 0.221  | 1829 (92.1)  | 4406 (94.5) | 1509 (93.7) | 346 (95.1) | 6261 (94.3) | 933 (79.3)   | 515 (97.3)  | 162 (72.0)  | <0.001      | 1630 (90.9)  | 8561 (90.1) | 6753 (92.5) | 2422 (91.7)  | <0.001       | 17736 (91.2) |              |
| Yes - PCR test                                                                                                                                                       | 93 (6.0)     | 17 (4.6)    | 4 (5.0)    |        | 117 (5.8)    | 217 (4.8)   | 8 (0.6)     | 0.164      | 81 (2.3)    | 289          | 246 (17.1)  | 56 (8.5)    | 247 (12.4)  | 645 (6.8)    | 321 (4.3)   | 109 (3.9)   | 1680 (6.6)   |              |              |              |
| Yes - antigen test                                                                                                                                                   | 11 (0.7)     | 3 (0.8)     | 1 (1.3)    |        | 8 (0.4)      | 15 (0.4)    | 0 (0.0)     | 0.425      | 24 (0.4)    | 56 (4.8)     | 10 (1.7)    | 20 (8.9)    | <0.001      | 86 (4.3)     | 136 (1.4)   | 61 (0.8)    | 36 (1.1)     | 0.002        | 227 (1.2)    |              |
| Yes - antibody testing                                                                                                                                               | 12 (0.8)     | 4 (1.1)     | 1 (1.3)    |        | 7 (0.4)      | 28 (0.6)    | 10 (0.6)    | 1 (0.3)    | 7 (0.2)     | 39 (0.6)     | 43 (2.3)    | 10 (1.7)    | 3 (1.3)     | 0.033*       | 54 (2.7)    | 12 (1.3)    | 55 (0.8)     | 26 (1.0)     | 0.003        | 203 (1.0)    |
| Yes - unsure about either of the three                                                                                                                               | 18 (1.2)     | 2 (0.5)     | 1 (1.3)    |        | 0 (0.0)      | 29 (0.6)    | 9 (0.5)     | <0.001     | 78 (1.2)    | 22 (1.9)     | 11 (1.9)    | 11 (4.9)    | 0.015*      | 44 (2.2)     | 108 (1.1)   | 140 (1.9)   | 68 (2.4)     | <0.001       | 316 (1.6)    |              |
| Presence of underlying diseases (e.g. diabetes, heart failure, respiratory disease, COPD, etc., or on dialysis, or using immunosuppressive or anticancer drugs) (SA) | 1535 (100.0) | 371 (100.0) | 80 (100.0) | NA     | 1986 (100.0) | 0 (100.0)   | 0 (100.0)   | NA         | 0 (100.0)   | 1176 (100.0) | 590 (100.0) | 225 (100.0) | NA          | 1991 (100.0) | 0 (100.0)   | 0 (100.0)   | 0 (100.0)    | NA           | 0 (100.0)    |              |
| Living with family members who are elderly or have underlying diseases (SA)                                                                                          | 878 (57.2)   | 214 (57.7)  | 52 (65.0)  | 0.388  | 1144 (57.6)  | 3844 (82.5) | 1376 (85.4) | 325 (89.3) | <0.001      | 5455 (83.6)  | 388 (46.7)  | 381 (16.0)  | 225 (100.0) | 0.006        | 1185 (95.5) | 833 (87.7)  | 6654 (99.8)  | 2417 (91.5)  | <0.001       | 17302 (99.0) |
| Preventive measures against COVID-19 (MA)                                                                                                                            |              |             |            |        |              |             |             |            |             |              |             |             |             |              |             |             |              |              |              |              |
| Avoid going to places with poor ventilation                                                                                                                          | 928 (60.5)   | 219 (59.0)  | 40 (50.0)  | 0.169  | 1187 (59.8)  | 2516 (62.6) | 963 (59.8)  | 189 (51.9) | <0.001      | 4008 (61.3)  | 614 (52.2)  | 318 (53.9)  | 86 (38.2)   | <0.001       | 1018 (51.1) | 4931 (51.9) | 3191 (43.7)  | 974 (36.9)   | <0.001       | 9096 (46.8)  |
| Avoid going to places where there are many people gathered                                                                                                           | 1344 (87.6)  | 312 (84.1)  | 57 (71.3)  | <0.001 | 1713 (86.3)  | 4059 (87.1) | 1318 (81.8) | 260 (71.4) | <0.001      | 5637 (84.9)  | 937 (79.7)  | 458 (77.6)  | 141 (62.7)  | <0.001       | 1536 (77.1) | 7472 (78.7) | 5221 (71.5)  | 1522 (57.6)  | <0.001       | 14215 (73.1) |
| Avoiding talking or speaking in close proximity to other people                                                                                                      | 1029 (67.0)  | 228 (61.5)  | 45 (56.3)  | 0.026* | 1303 (65.6)  | 3008 (64.5) | 190 (52.2)  | <0.001     | 4355 (64.9) | 647 (55.0)   | 334 (53.2)  | 84 (36.9)   | 1044 (52.4) | <0.001       | 1044 (52.4) | 4828 (51.4) | 3157 (43.2)  | 1919 (34.8)  | <0.001       | 8958 (46.1)  |
| Washing hands, gargling, and hand disinfection with alcohol                                                                                                          | 1392 (90.7)  | 330 (89.9)  | 63 (78.8)  | 0.002  | 1768 (89.9)  | 4248 (91.1) | 1364 (84.7) | 257 (70.6) | <0.001      | 5869 (88.4)  | 930 (79.1)  | 480 (81.4)  | 128 (56.9)  | <0.001       | 1538 (77.2) | 7981 (82.6) | 5340 (75.9)  | 1588 (60.1)  | <0.001       | 14969 (77.0) |
| Etiquette (masks, handkerchiefs, etc.) in case of coughing or sneezing                                                                                               | 1186 (76.0)  | 280 (75.3)  | 56 (70.0)  | 0.479  | 1502 (75.2)  | 3639 (78.1) | 1177 (73.1) | 246 (69.6) | <0.001      | 5562 (76.3)  | 837 (72.2)  | 427 (72.4)  | 180 (84.6)  | <0.001       | 1568 (68.5) | 6563 (69.5) | 4568 (62.5)  | 1273 (48.1)  | <0.001       | 12397 (65.8) |
| Taleness                                                                                                                                                             | 61 (4.0)     | 21 (5.7)    | 1 (1.3)    | 0.392  | 74 (3.7)     | 155 (3.3)   | 33 (2.0)    | 9 (2.5)    | 0.020*      | 197 (3.0)    | 144 (12.3)  | 44 (19.5)   | 22 (9.8)    | 0.008        | 210 (10.5)  | 107 (11.3)  | 612 (8.4)    | 215 (8.4)    | <0.001       | 1514 (8.0)   |
| Be conscious of social distancing                                                                                                                                    | 873 (56.9)   | 188 (50.7)  | 43 (53.8)  | 0.092  | 1104 (56.3)  | 2598 (55.7) | 803 (49.8)  | 174 (47.8) | <0.001      | 3575 (53.9)  | 555 (50.6)  | 292 (49.5)  | 65 (29.3)   | <0.001       | 953 (47.9)  | 4572 (48.1) | 2868 (39.3)  | 786 (29.8)   | <0.001       | 8226 (42.3)  |
| Avoid going out unnecessarily.                                                                                                                                       | 1232 (80.3)  | 284 (76.5)  | 56 (70.0)  | 0.015* | 1572 (79.2)  | 3697 (79.3) | 1202 (74.4) | 229 (60.4) | <0.001      | 5151 (75.7)  | 738 (62.8)  | 380 (64.4)  | 98 (43.6)   | <0.001       | 1216 (61.1) | 5911 (62.5) | 4098 (56.1)  | 1102 (39.5)  | <0.001       | 11271 (56.9) |
| Other preventive measures                                                                                                                                            | 49 (3.2)     | 16 (4.3)    | 7 (8.8)    | 0.025* | 72 (3.6)     | 129 (2.8)   | 64 (4.0)    | 15 (4.1)   | 0.911*      | 208 (3.1)    | 48 (4.1)    | 32 (14.4)   | 11 (4.9)    | 0.431        | 91 (4.4)    | 221 (0.0)   | 314 (2.5)    | 222 (0.0)    | 0.011*       | 542 (2.8)    |
| No preventive measures                                                                                                                                               | 20 (1.3)     | 7 (1.9)     | 9 (11.3)   | <0.001 | 36 (1.8)     | 63 (1.4)    | 70 (3.4)    | 41 (11.3)  | <0.001      | 174 (2.6)    | 21 (1.8)    | 26 (4.4)    | 18 (8.0)    | <0.001       | 65 (3.3)    | 264 (2.8)   | 894 (13.0)   | 87 (4.3)     | <0.001       | 1157 (6.0)   |
| Has anyone close to you ever been infected with COVID-19? (MA)                                                                                                       |              |             |            |        |              |             |             |            |             |              |             |             |             |              |             |             |              |              |              |              |
| Family or friends                                                                                                                                                    | 48 (3.1)     | 6 (1.6)     | 1 (1.3)    | 0.198  | 55 (2.8)     | 116 (2.5)   | 21 (1.3)    | 6 (1.6)    | 0.015       | 143 (2.2)    | 117 (9.9)   | 17 (7.9)    | 17 (7.6)    | <0.001       | 151 (7.6)   | 347 (3.7)   | 188 (2.7)    | 76 (2.9)     | 0.002        | 621 (3.2)    |
| Colleagues at work                                                                                                                                                   | 22 (1.4)     | 1 (0.3)     | 0 (0.0)    | 0.105  | 23 (1.2)     | 36 (0.8)    | 17 (1.1)    | 4 (1.1)    | 0.500       | 57 (0.9)     | 30 (5.1)    | 32 (14.2)   | <0.001      | 207 (10.4)   | 648 (6.8)   | 381 (2.2)   | 162 (6.1)    | <0.001       | 1191 (6.1)   |              |
| No/ don't know                                                                                                                                                       | 1467 (95.6)  | 364 (98.1)  | 79 (98.8)  | 0.034* | 1910 (96.2)  | 4509 (96.7) | 1574 (97.7) | 354 (97.3) | 0.141       | 6347 (97.0)  | 544 (92.2)  | 178 (79.1)  | 1660 (83.4) | 8539 (89.9)  | 4672 (93.2) | 2405 (91.1) | <0.001       | 17886 (91.0) |              |              |
| Have you ever refrained from visiting a medical institution because you were anxious about being infected by the new coronavirus? (MA)                               |              |             |            |        |              |             |             |            |             |              |             |             |             |              |             |             |              |              |              |              |
| Have refrained from regular hospital visits                                                                                                                          | 316 (20.6)   | 80 (21.6)   | 17 (21.3)  | 0.912  | 413 (20.8)   | 890 (17.8)  | 269 (16.7)  | 43 (11.8)  | 0.012*      | 1142 (17.2)  | 302 (25.7)  | 97 (36.4)   | 56 (24.9)   | <0.001       | 455 (22.9)  | 1296 (13.6) | 771 (10.6)   | 241 (9.1)    | <0.001       | 2308 (11.9)  |
| Have refrained from visiting the hospital for physical examinations, such as a cold, headache, or stomachache                                                        | 103 (6.7)    | 26 (7.0)    | 6 (7.5)    | 0.948  | 135 (6.8)    | 291 (6.3)   | 93 (5.8)    | 13 (3.4)   | 0.099       | 399 (6.0)    | 184 (15.6)  | 68 (31.5)   | 43 (19.1)   | 0.011*       | 295 (14.4)  | 1004 (10.6) | 510 (8.0)    | 212 (8.0)    | <0.001       | 1560 (10.1)  |
| Have refrained from medical checkups, sudden symptoms, or cancer screenings                                                                                          | 136 (9.2)    | 31 (8.3)    | 10 (12.5)  | 0.188  | 151 (8.8)    | 327 (14.4)  | 208 (12.8)  | 39 (10.7)  | 0.066       | 519 (13.8)   | 152 (12.9)  | 64 (28.0)   | 30 (13.9)   | 0.367        | 254 (12.8)  | 919 (9.7)   | 744 (10.2)   | 310 (11.1)   | <0.001       | 1640 (8.6)   |
| Have refrained from other medical examinations                                                                                                                       | 14 (0.9)     | 1 (0.3)     | 0 (0.0)    |        | 15 (0.7)     | 33 (0.7)    | 4 (1.1)     | 0.011*     | 70 (1.1)    | 15 (1.3)     | 21 (9.0)    | 7 (3.1)     | 18 (8.3)    | <0.001       | 183 (9.3)   | 880 (9.3)   | 602 (8.3)    | 83 (4.3)     | <0.001       | 2813 (14.5)  |

|                                                                                                                                                 |             |            |           |             |             |             |            |             |             |            |            |             |             |             |             |              |
|-------------------------------------------------------------------------------------------------------------------------------------------------|-------------|------------|-----------|-------------|-------------|-------------|------------|-------------|-------------|------------|------------|-------------|-------------|-------------|-------------|--------------|
| If others have been vaccinated against COVID-19, do you think you should be vaccinated as well? (SA) – perceived norms about a COVID-19 vaccine |             |            |           |             |             |             |            |             |             |            |            |             |             |             |             |              |
|                                                                                                                                                 |             |            | <0.001    |             |             |             |            | <0.001      |             |            |            |             | <0.001      |             | <0.001      |              |
| Strongly disagree                                                                                                                               | 13 (0.8)    | 2 (0.5)    | 26 (32.5) | 41 (2.1)    | 15 (0.3)    | 16 (1.0)    | 98 (26.9)  | 129 (1.9)   | 38 (3.2)    | 20 (1.4)   | 67 (29.8)  | 125 (6.3)   | 70 (0.7)    | 109 (1.5)   | 698 (26.4)  | 877 (4.5)    |
| Disagree                                                                                                                                        | 55 (3.6)    | 62 (16.7)  | 32 (40.0) | 149 (7.5)   | 159 (3.4)   | 274 (17.0)  | 173 (47.0) | 604 (9.1)   | 73 (6.2)    | 71 (22.0)  | 73 (32.4)  | 217 (10.9)  | 378 (4.0)   | 848 (11.6)  | 860 (32.6)  | 2086 (10.7)  |
| Neither agree nor disagree                                                                                                                      | 133 (10.0)  | 186 (50.1) | 17 (21.3) | 356 (17.9)  | 481 (10.3)  | 839 (52.1)  | 85 (23.4)  | 1405 (21.2) | 184 (15.6)  | 311 (52.7) | 67 (29.8)  | 562 (28.2)  | 1528 (16.1) | 4126 (36.5) | 894 (33.9)  | 6548 (31.7)  |
| Agree                                                                                                                                           | 962 (82.7)  | 116 (31.3) | 4 (5.0)   | 1050 (54.5) | 3052 (65.7) | 466 (28.3)  | 5 (1.4)    | 3333 (53.2) | 580 (49.3)  | 175 (29.7) | 13 (5.8)   | 768 (38.6)  | 5546 (58.4) | 2134 (29.2) | 172 (6.5)   | 7852 (40.4)  |
| Strongly agree                                                                                                                                  | 352 (22.9)  | 5 (1.3)    | 1 (1.3)   | 358 (18.0)  | 944 (20.3)  | 16 (1.0)    | 5 (1.4)    | 955 (14.5)  | 301 (25.6)  | 13 (2.2)   | 5 (2.2)    | 319 (16.0)  | 1975 (20.8) | 85 (1.2)    | 17 (0.6)    | 2077 (10.7)  |
| Do you trust scientists in the field of vaccine development for COVID-19? (SA) – trusts about COVID-19 vaccine                                  |             |            |           |             |             |             |            |             |             |            |            |             |             |             |             |              |
|                                                                                                                                                 |             |            | <0.001    |             |             |             |            | <0.001      |             |            |            |             | <0.001      |             | <0.001      |              |
| Strongly distrust                                                                                                                               | 5 (0.3)     | 4 (1.1)    | 10 (12.5) | 19 (1.0)    | 2 (0.0)     | 9 (0.6)     | 39 (10.7)  | 50 (0.8)    | 24 (2.0)    | 17 (2.9)   | 35 (15.0)  | 76 (3.8)    | 43 (0.5)    | 87 (1.2)    | 355 (13.4)  | 485 (2.5)    |
| Distrust                                                                                                                                        | 28 (1.8)    | 36 (9.7)   | 15 (18.8) | 79 (4.0)    | 70 (1.5)    | 115 (7.1)   | 72 (19.8)  | 257 (1.9)   | 74 (6.3)    | 47 (8.0)   | 53 (23.6)  | 174 (8.7)   | 237 (2.5)   | 507 (6.9)   | 513 (19.4)  | 1257 (6.5)   |
| Neutral                                                                                                                                         | 292 (19.0)  | 187 (50.4) | 32 (40.0) | 511 (25.7)  | 860 (18.5)  | 920 (57.1)  | 181 (49.7) | 1961 (29.6) | 302 (25.7)  | 342 (58.0) | 102 (45.3) | 746 (37.5)  | 2553 (26.9) | 4486 (61.4) | 1325 (50.2) | 8364 (43.0)  |
| Trust                                                                                                                                           | 1109 (72.2) | 142 (38.3) | 22 (27.5) | 1273 (64.1) | 3443 (73.9) | 549 (34.1)  | 68 (18.7)  | 4060 (61.2) | 672 (57.1)  | 172 (29.2) | 31 (13.8)  | 875 (43.9)  | 6032 (63.3) | 2119 (29.0) | 412 (15.6)  | 8543 (43.9)  |
| Strongly trust                                                                                                                                  | 101 (6.6)   | 2 (0.5)    | 1 (1.3)   | 104 (5.2)   | 286 (6.1)   | 18 (1.1)    | 4 (1.1)    | 308 (4.6)   | 104 (8.8)   | 12 (2.0)   | 4 (1.8)    | 120 (6.0)   | 652 (6.9)   | 103 (1.4)   | 36 (1.4)    | 791 (4.1)    |
| Do you trust the public authorities to approve vaccines for COVID-19? (SA) – trusts about COVID-19 vaccine                                      |             |            |           |             |             |             |            |             |             |            |            |             |             |             |             |              |
|                                                                                                                                                 |             |            | <0.001    |             |             |             |            | <0.001      |             |            |            |             | <0.001      |             | <0.001      |              |
| Strongly distrust                                                                                                                               | 15 (1.0)    | 11 (3.0)   | 14 (17.5) | 40 (2.0)    | 13 (0.3)    | 36 (2.2)    | 63 (17.3)  | 112 (1.7)   | 31 (2.6)    | 36 (6.1)   | 58 (25.8)  | 125 (6.3)   | 66 (0.7)    | 203 (2.8)   | 504 (19.1)  | 773 (4.0)    |
| Distrust                                                                                                                                        | 72 (4.7)    | 63 (17.0)  | 25 (31.3) | 160 (8.1)   | 149 (3.2)   | 255 (15.8)  | 117 (32.1) | 521 (7.9)   | 100 (8.5)   | 100 (16.9) | 51 (22.7)  | 251 (12.6)  | 447 (4.7)   | 996 (13.6)  | 645 (24.4)  | 2088 (10.7)  |
| Neutral                                                                                                                                         | 373 (24.3)  | 189 (50.9) | 26 (32.5) | 588 (29.6)  | 1147 (24.6) | 926 (57.5)  | 141 (38.7) | 2214 (33.4) | 364 (31.0)  | 311 (52.7) | 84 (37.3)  | 759 (38.1)  | 3000 (31.6) | 4378 (60.0) | 1156 (43.8) | 8534 (43.9)  |
| Trust                                                                                                                                           | 1019 (66.4) | 107 (28.8) | 14 (17.5) | 1140 (57.4) | 3169 (68.0) | 382 (23.7)  | 39 (10.7)  | 3390 (54.1) | 601 (51.1)  | 131 (22.2) | 28 (12.4)  | 760 (38.2)  | 5476 (57.7) | 1647 (22.6) | 311 (11.8)  | 7434 (38.2)  |
| Strongly trust                                                                                                                                  | 56 (3.6)    | 1 (0.3)    | 1 (1.3)   | 58 (2.9)    | 183 (3.9)   | 12 (0.7)    | 4 (1.1)    | 199 (3.0)   | 80 (6.8)    | 12 (2.0)   | 4 (1.8)    | 96 (4.8)    | 508 (5.3)   | 78 (1.1)    | 25 (0.9)    | 611 (3.1)    |
| Do you trust your healthcare provider about vaccination against COVID-19? (SA) – trusts about COVID-19 vaccine                                  |             |            |           |             |             |             |            |             |             |            |            |             |             |             |             |              |
|                                                                                                                                                 |             |            | <0.001    |             |             |             |            | <0.001      |             |            |            |             | <0.001      |             | <0.001      |              |
| Strongly distrust                                                                                                                               | 4 (0.3)     | 1 (0.3)    | 7 (8.8)   | 12 (0.6)    | 4 (0.1)     | 9 (0.6)     | 33 (9.1)   | 46 (0.7)    | 26 (2.2)    | 15 (2.5)   | 31 (13.8)  | 72 (3.6)    | 21 (0.2)    | 83 (1.1)    | 314 (11.9)  | 418 (2.2)    |
| Distrust                                                                                                                                        | 25 (1.6)    | 13 (3.5)   | 12 (15.0) | 50 (2.5)    | 42 (0.9)    | 84 (5.2)    | 70 (19.2)  | 196 (1.0)   | 53 (4.5)    | 34 (5.8)   | 44 (19.6)  | 131 (6.6)   | 168 (1.8)   | 356 (4.9)   | 402 (15.2)  | 926 (4.8)    |
| Neutral                                                                                                                                         | 156 (10.2)  | 145 (39.1) | 32 (40.0) | 333 (16.8)  | 516 (11.1)  | 731 (45.4)  | 166 (45.6) | 1413 (21.3) | 191 (16.2)  | 247 (41.9) | 100 (44.4) | 1388 (27.0) | 1685 (17.7) | 3509 (48.1) | 1269 (48.0) | 6463 (31.2)  |
| Trust                                                                                                                                           | 1225 (79.8) | 206 (55.5) | 27 (33.8) | 1458 (73.4) | 3711 (79.6) | 766 (47.5)  | 89 (24.5)  | 4566 (68.8) | 744 (63.3)  | 269 (45.6) | 43 (19.1)  | 1056 (53.0) | 6584 (69.3) | 3132 (42.9) | 591 (22.4)  | 10307 (53.0) |
| Strongly trust                                                                                                                                  | 125 (8.1)   | 6 (1.6)    | 2 (2.5)   | 133 (6.7)   | 388 (8.3)   | 21 (1.3)    | 6 (1.6)    | 415 (6.3)   | 162 (13.8)  | 25 (4.2)   | 7 (3.1)    | 194 (9.7)   | 1039 (10.9) | 222 (3.0)   | 65 (2.5)    | 1326 (6.8)   |
| Do you think that healthcare workers and employees of elderly care facilities should be vaccinated? (SA) – belief about COVID-19 vaccine        |             |            |           |             |             |             |            |             |             |            |            |             |             |             |             |              |
|                                                                                                                                                 |             |            | <0.001    |             |             |             |            | <0.001      |             |            |            |             | <0.001      |             | <0.001      |              |
| Yes                                                                                                                                             | 1494 (97.3) | 266 (71.7) | 35 (43.8) | 1795 (90.4) | 4531 (97.2) | 1071 (66.5) | 138 (37.9) | 5740 (86.5) | 1067 (90.7) | 380 (61.0) | 75 (33.3)  | 1502 (75.4) | 8653 (91.1) | 4326 (59.2) | 901 (34.1)  | 13880 (71.4) |
| No                                                                                                                                              | 6 (0.4)     | 3 (0.8)    | 13 (16.3) | 22 (1.1)    | 18 (0.4)    | 15 (0.9)    | 44 (12.1)  | 77 (1.2)    | 37 (3.1)    | 16 (2.7)   | 48 (21.3)  | 101 (5.1)   | 138 (1.5)   | 245 (3.4)   | 577 (21.8)  | 960 (4.9)    |
| Can't say either                                                                                                                                | 35 (2.3)    | 102 (27.5) | 32 (40.0) | 169 (8.5)   | 112 (2.4)   | 525 (32.6)  | 182 (50.0) | 819 (12.3)  | 72 (6.1)    | 214 (36.3) | 102 (45.3) | 388 (19.5)  | 706 (7.4)   | 2731 (37.4) | 1163 (44.0) | 4600 (23.7)  |
| Do you receive an influenza vaccine? (SA)                                                                                                       |             |            |           |             |             |             |            |             |             |            |            |             |             |             |             |              |
|                                                                                                                                                 |             |            | <0.001    |             |             |             |            | <0.001      |             |            |            |             | <0.001      |             | <0.001      |              |
| Every year                                                                                                                                      | 976 (63.6)  | 147 (39.6) | 9 (11.3)  | 1132 (57.0) | 2446 (52.5) | 435 (27.0)  | 25 (6.9)   | 2906 (43.8) | 591 (50.3)  | 159 (26.9) | 26 (11.6)  | 776 (39.0)  | 4267 (44.9) | 1621 (22.2) | 372 (14.1)  | 6260 (32.2)  |
| Every few years                                                                                                                                 | 281 (18.3)  | 60 (16.2)  | 11 (13.8) | 352 (17.7)  | 912 (20.0)  | 285 (17.7)  | 36 (9.9)   | 1253 (18.9) | 248 (21.1)  | 102 (17.3) | 50 (22.2)  | 400 (20.1)  | 1258 (17.2) | 322 (13.2)  | 3482 (17.9) | 3482 (17.9)  |
| Rarely or never                                                                                                                                 | 278 (18.1)  | 164 (44.2) | 60 (75.0) | 502 (25.3)  | 1283 (27.5) | 891 (55.3)  | 303 (83.2) | 2477 (37.3) | 337 (28.7)  | 329 (55.8) | 149 (66.2) | 815 (40.9)  | 3323 (35.0) | 4428 (60.6) | 1947 (73.7) | 9698 (49.9)  |
| Did you receive on routine immunization? (SA)                                                                                                   |             |            |           |             |             |             |            |             |             |            |            |             |             |             |             |              |
|                                                                                                                                                 |             |            | <0.001    |             |             |             |            | <0.001      |             |            |            |             | <0.001      |             | <0.001      |              |
| All                                                                                                                                             | 502 (32.7)  | 51 (13.7)  | 3 (3.8)   | 556 (28.0)  | 1312 (28.1) | 192 (11.9)  | 21 (5.8)   | 1525 (23.0) | 329 (28.0)  | 83 (14.1)  | 22 (9.8)   | 434 (21.8)  | 2522 (26.5) | 996 (13.6)  | 254 (9.6)   | 3770 (19.4)  |
| Partially                                                                                                                                       | 469 (30.6)  | 85 (22.9)  | 20 (25.0) | 574 (28.9)  | 1300 (27.9) | 353 (21.9)  | 36 (9.9)   | 1689 (25.5) | 240 (22.1)  | 76 (12.9)  | 48 (21.3)  | 384 (19.3)  | 1631 (17.2) | 835 (11.4)  | 276 (10.5)  | 2742 (14.1)  |
| None                                                                                                                                            | 341 (22.2)  | 158 (42.6) | 46 (57.5) | 545 (27.4)  | 1304 (28.0) | 772 (47.9)  | 281 (77.2) | 2357 (35.5) | 381 (32.7)  | 279 (47.3) | 120 (53.3) | 780 (39.2)  | 3382 (35.6) | 3617 (49.5) | 1660 (62.9) | 8659 (44.5)  |
| Not sure                                                                                                                                        | 223 (14.5)  | 77 (20.8)  | 11 (13.8) | 311 (15.7)  | 745 (16.0)  | 294 (18.2)  | 26 (7.1)   | 1065 (16.0) | 206 (17.5)  | 152 (25.8) | 35 (15.6)  | 393 (19.7)  | 1963 (20.7) | 1855 (25.4) | 451 (17.1)  | 4269 (22.0)  |

1 SA: single-answer questions; MA: multiple-answer question; \* Statistical significance disappeared after Bonferroni correction for multiple testing

1

### Supplementary Table 3: Sources of COVID-19 information by three COVID-19 vaccine intention groups for pooled and by Groups (A–D)

|                                                                                                                                                                                      | Pooled       |             |             |         |              | Group (A) elderly with underlying diseases |            |           |         |             | Group (B) elderly without underlying diseases |             |            |         |             | Group (C) younger adults with underlying diseases |            |            |         |             | Group (D) younger adults without underlying diseases |             |             |         |              |
|--------------------------------------------------------------------------------------------------------------------------------------------------------------------------------------|--------------|-------------|-------------|---------|--------------|--------------------------------------------|------------|-----------|---------|-------------|-----------------------------------------------|-------------|------------|---------|-------------|---------------------------------------------------|------------|------------|---------|-------------|------------------------------------------------------|-------------|-------------|---------|--------------|
|                                                                                                                                                                                      | Yes          | Not sure    | No          | P-value | Total        | Yes                                        | Not sure   | No        | P-value | Total       | Yes                                           | Not sure    | No         | P-value | Total       | Yes                                               | Not sure   | No         | P-value | Total       | Yes                                                  | Not sure    | No          | P-value | Total        |
|                                                                                                                                                                                      | N = 18689    | N = 9874    | N = 3310    |         | N = 30053    | N = 1535                                   | N = 371    | N = 80    |         | N = 1986    | N = 4661                                      | N = 1611    | N = 364    |         | N = 6636    | N = 1176                                          | N = 590    | N = 225    |         | N = 1991    | N = 9497                                             | N = 7302    | N = 2641    |         | N = 19440    |
| <b>From what sources do you get information about COVID-19? (MA)</b>                                                                                                                 |              |             |             |         |              |                                            |            |           |         |             |                                               |             |            |         |             |                                                   |            |            |         |             |                                                      |             |             |         |              |
| Physicians                                                                                                                                                                           | 2415 (14.3)  | 804 (8.1)   | 249 (7.5)   | <0.001  | 3468 (11.5)  | 388 (25.3)                                 | 89 (24.0)  | 25 (31.3) | 0.399   | 502 (25.3)  | 623 (13.4)                                    | 175 (10.9)  | 25 (6.9)   | <0.001  | 823 (12.4)  | 292 (24.8)                                        | 101 (17.1) | 35 (15.6)  | <0.001  | 428 (21.5)  | 1132 (11.7)                                          | 439 (6.0)   | 164 (6.2)   | <0.001  | 1715 (8.8)   |
| Nurses                                                                                                                                                                               | 896 (5.3)    | 300 (3.0)   | 115 (3.5)   | <0.001  | 1311 (4.4)   | 91 (5.9)                                   | 20 (5.4)   | 6 (7.5)   | 0.762   | 117 (5.9)   | 175 (3.8)                                     | 46 (2.9)    | 8 (2.2)    | 0.094   | 229 (3.5)   | 143 (12.2)                                        | 42 (7.1)   | 17 (7.6)   | 0.002*  | 202 (10.1)  | 487 (5.1)                                            | 192 (2.6)   | 84 (3.2)    | <0.001  | 763 (3.9)    |
| Pharmacists                                                                                                                                                                          | 409 (2.4)    | 119 (1.2)   | 66 (2.0)    | <0.001  | 594 (2.0)    | 52 (3.4)                                   | 16 (4.3)   | 4 (5.0)   | 0.554   | 72 (3.6)    | 92 (2.0)                                      | 21 (1.3)    | 5 (1.4)    | 0.179   | 118 (1.8)   | 80 (6.8)                                          | 16 (2.7)   | 13 (5.8)   | 0.002*  | 109 (5.5)   | 185 (1.9)                                            | 66 (0.9)    | 44 (1.7)    | <0.001  | 295 (1.5)    |
| Veterinarians                                                                                                                                                                        | 45 (0.3)     | 14 (0.1)    | 10 (0.3)    | 0.078   | 69 (0.2)     | 1 (0.1)                                    | 0 (0.0)    | 0 (0.0)   | 0.863   | 1 (0.1)     | 5 (0.1)                                       | 2 (0.1)     | 0 (0.0)    | 0.803   | 7 (0.1)     | 21 (1.8)                                          | 2 (0.3)    | 3 (1.3)    | 0.041*  | 26 (1.3)    | 18 (0.2)                                             | 10 (0.1)    | 7 (0.3)     | 0.394   | 35 (0.2)     |
| Dentists                                                                                                                                                                             | 209 (1.2)    | 70 (0.7)    | 27 (0.8)    | <0.001  | 306 (1.0)    | 29 (1.9)                                   | 8 (2.2)    | 0 (0.0)   | 0.428   | 37 (1.9)    | 76 (1.6)                                      | 14 (0.9)    | 5 (1.4)    | 0.085   | 95 (1.4)    | 20 (1.7)                                          | 8 (1.4)    | 4 (1.8)    | 0.843   | 32 (1.6)    | 84 (0.9)                                             | 40 (0.5)    | 18 (0.7)    | 0.038*  | 142 (0.7)    |
| Health fairs and events                                                                                                                                                              | 173 (1.0)    | 60 (0.6)    | 28 (0.8)    | 0.002*  | 261 (0.9)    | 17 (1.1)                                   | 2 (0.5)    | 2 (2.5)   | 0.275   | 21 (1.1)    | 45 (1.0)                                      | 14 (0.9)    | 4 (1.1)    | 0.900   | 63 (0.9)    | 26 (2.2)                                          | 5 (0.8)    | 3 (1.3)    | 0.102   | 34 (1.7)    | 85 (0.9)                                             | 39 (0.5)    | 19 (0.7)    | 0.025*  | 143 (0.7)    |
| Newspapers                                                                                                                                                                           | 7153 (42.4)  | 2860 (29.0) | 611 (18.5)  | <0.001  | 10624 (35.4) | 927 (60.4)                                 | 187 (50.4) | 36 (45.0) | <0.001  | 1150 (57.9) | 2859 (61.3)                                   | 813 (50.5)  | 144 (39.6) | <0.001  | 3816 (57.5) | 411 (34.9)                                        | 183 (31.0) | 32 (14.2)  | <0.001  | 626 (31.4)  | 2956 (31.1)                                          | 1677 (23.0) | 999 (15.1)  | <0.001  | 5032 (25.9)  |
| Magazines                                                                                                                                                                            | 975 (5.8)    | 351 (3.6)   | 107 (3.2)   | <0.001  | 1433 (4.8)   | 91 (5.9)                                   | 21 (5.7)   | 4 (5.0)   | 0.930   | 116 (5.8)   | 297 (6.4)                                     | 71 (4.4)    | 18 (4.9)   | 0.011*  | 386 (5.8)   | 73 (6.2)                                          | 25 (4.2)   | 9 (4.0)    | 0.139   | 107 (5.4)   | 514 (5.4)                                            | 234 (3.2)   | 76 (2.9)    | <0.001  | 824 (4.2)    |
| Books                                                                                                                                                                                | 515 (3.1)    | 207 (2.1)   | 88 (2.7)    | <0.001  | 810 (2.7)    | 39 (2.5)                                   | 11 (3.0)   | 2 (2.5)   | 0.898   | 52 (2.6)    | 117 (2.5)                                     | 43 (2.7)    | 13 (3.6)   | 0.465   | 173 (2.6)   | 57 (4.8)                                          | 17 (2.9)   | 11 (4.9)   | 0.139   | 85 (4.3)    | 302 (3.2)                                            | 136 (1.9)   | 62 (2.3)    | <0.001  | 500 (2.6)    |
| Scientific literature                                                                                                                                                                | 260 (1.5)    | 85 (0.9)    | 61 (1.8)    | <0.001  | 406 (1.4)    | 18 (1.2)                                   | 3 (0.8)    | 0 (0.0)   | 0.530   | 21 (1.1)    | 43 (0.9)                                      | 17 (1.1)    | 9 (2.5)    | 0.019*  | 69 (1.0)    | 27 (2.3)                                          | 3 (0.5)    | 7 (3.1)    | 0.011*  | 37 (1.9)    | 172 (1.8)                                            | 62 (0.8)    | 45 (1.7)    | <0.001  | 279 (1.4)    |
| Television                                                                                                                                                                           | 14634 (86.8) | 7919 (80.2) | 1960 (59.2) | <0.001  | 24513 (81.6) | 1428 (93.0)                                | 336 (90.6) | 62 (77.5) | <0.001  | 1826 (91.9) | 4369 (93.7)                                   | 1404 (87.2) | 244 (67.0) | <0.001  | 6017 (90.7) | 899 (76.4)                                        | 461 (78.1) | 114 (50.7) | <0.001  | 1474 (74.0) | 7938 (83.6)                                          | 5718 (78.3) | 1540 (58.3) | <0.001  | 15196 (78.2) |
| Radio                                                                                                                                                                                | 2369 (14.0)  | 1050 (10.6) | 287 (8.7)   | <0.001  | 3706 (12.3)  | 239 (15.6)                                 | 44 (11.9)  | 15 (18.8) | 0.126   | 298 (15.0)  | 870 (18.7)                                    | 288 (17.9)  | 47 (12.9)  | 0.022*  | 1205 (18.2) | 166 (14.1)                                        | 62 (10.5)  | 20 (8.9)   | 0.022*  | 248 (12.5)  | 1094 (11.5)                                          | 656 (9.0)   | 205 (7.8)   | <0.001  | 1955 (10.1)  |
| Internet news sites                                                                                                                                                                  | 9234 (54.7)  | 5297 (53.6) | 1485 (44.9) | <0.001  | 16016 (53.3) | 836 (54.5)                                 | 200 (53.9) | 46 (57.5) | 0.842   | 1082 (54.5) | 2446 (52.5)                                   | 854 (53.0)  | 197 (54.1) | 0.799   | 3497 (52.7) | 636 (54.1)                                        | 336 (56.9) | 81 (36.0)  | <0.001  | 1053 (52.9) | 5316 (56.0)                                          | 3907 (53.5) | 1161 (44.0) | <0.001  | 10384 (53.4) |
| Search engines (Google, Yahoo, etc.)                                                                                                                                                 | 3626 (21.5)  | 2106 (21.3) | 667 (20.2)  | 0.224   | 6399 (21.3)  | 268 (17.5)                                 | 69 (18.6)  | 12 (15.0) | 0.723   | 349 (17.6)  | 805 (17.3)                                    | 240 (16.1)  | 59 (16.2)  | 0.539   | 1124 (16.9) | 270 (23.0)                                        | 140 (23.7) | 35 (15.5)  | 0.032*  | 445 (22.4)  | 2283 (24.0)                                          | 1637 (22.4) | 561 (21.2)  | 0.003*  | 4481 (23.1)  |
| LINE                                                                                                                                                                                 | 1259 (7.5)   | 663 (6.7)   | 204 (6.2)   | 0.007*  | 2126 (7.1)   | 93 (6.1)                                   | 16 (4.3)   | 5 (6.3)   | 0.422   | 114 (5.7)   | 280 (6.0)                                     | 71 (4.4)    | 15 (4.1)   | 0.026*  | 366 (5.5)   | 113 (9.6)                                         | 56 (9.5)   | 17 (7.6)   | 0.618   | 186 (9.3)   | 773 (8.1)                                            | 520 (7.1)   | 167 (6.3)   | 0.002*  | 1460 (7.5)   |
| Facebook                                                                                                                                                                             | 378 (2.2)    | 150 (1.5)   | 78 (2.4)    | <0.001  | 606 (2.0)    | 35 (2.3)                                   | 7 (1.9)    | 5 (6.3)   | 0.060   | 47 (2.4)    | 91 (2.0)                                      | 19 (1.2)    | 16 (4.4)   | <0.001  | 126 (1.9)   | 39 (3.3)                                          | 17 (2.9)   | 7 (3.1)    | 0.885   | 63 (3.2)    | 213 (2.2)                                            | 107 (1.5)   | 50 (1.9)    | 0.001   | 370 (1.9)    |
| Twitter                                                                                                                                                                              | 1170 (6.9)   | 823 (8.3)   | 395 (11.9)  | <0.001  | 2388 (7.9)   | 27 (1.8)                                   | 10 (2.7)   | 6 (7.5)   | 0.002*  | 43 (2.2)    | 77 (1.7)                                      | 36 (2.2)    | 16 (4.4)   | <0.001  | 129 (1.9)   | 106 (9.0)                                         | 53 (9.0)   | 26 (11.6)  | 0.462   | 185 (9.3)   | 960 (10.1)                                           | 724 (9.9)   | 347 (13.1)  | <0.001  | 2031 (10.4)  |
| Instagram                                                                                                                                                                            | 228 (1.4)    | 137 (1.4)   | 66 (2.0)    | 0.016*  | 431 (1.4)    | 3 (0.2)                                    | 3 (0.8)    | 0 (0.0)   | 0.137   | 6 (0.3)     | 15 (0.3)                                      | 7 (0.4)     | 0 (0.0)    | 0.419   | 22 (0.3)    | 30 (2.6)                                          | 11 (1.9)   | 5 (2.2)    | 0.661   | 46 (2.3)    | 180 (1.9)                                            | 116 (1.6)   | 61 (2.3)    | 0.051   | 357 (1.8)    |
| YouTube                                                                                                                                                                              | 737 (4.4)    | 553 (5.6)   | 317 (9.6)   | <0.001  | 1607 (5.3)   | 59 (3.8)                                   | 22 (5.9)   | 10 (12.5) | <0.001  | 91 (4.6)    | 143 (3.1)                                     | 81 (5.0)    | 45 (12.4)  | <0.001  | 269 (4.1)   | 78 (6.6)                                          | 40 (6.8)   | 15 (6.7)   | 0.993   | 133 (6.7)   | 457 (4.8)                                            | 410 (5.6)   | 247 (9.4)   | <0.001  | 1114 (5.7)   |
| TikTok                                                                                                                                                                               | 71 (0.4)     | 25 (0.3)    | 15 (0.5)    | 0.065   | 111 (0.4)    | 3 (0.2)                                    | 0 (0.0)    | 0 (0.0)   | 0.643   | 3 (0.2)     | 7 (0.2)                                       | 1 (0.1)     | 0 (0.0)    | 0.539   | 8 (0.1)     | 19 (1.6)                                          | 2 (0.3)    | 2 (0.9)    | 0.056   | 23 (1.2)    | 42 (0.4)                                             | 22 (0.3)    | 13 (0.5)    | 0.247   | 77 (0.4)     |
| Medical information sites                                                                                                                                                            | 516 (3.1)    | 161 (1.6)   | 79 (2.4)    | <0.001  | 756 (2.5)    | 42 (2.7)                                   | 5 (1.3)    | 3 (3.8)   | 0.239   | 50 (2.5)    | 91 (2.0)                                      | 38 (2.4)    | 15 (4.1)   | 0.020*  | 144 (2.2)   | 58 (4.9)                                          | 19 (3.2)   | 8 (3.6)    | 0.209   | 85 (4.3)    | 325 (3.4)                                            | 99 (1.4)    | 53 (2.0)    | <0.001  | 477 (2.5)    |
| Blogs or web pages of celebrities and famous people                                                                                                                                  | 290 (1.7)    | 175 (1.8)   | 106 (3.2)   | <0.001  | 571 (1.9)    | 17 (1.1)                                   | 2 (0.5)    | 4 (5.0)   | 0.003*  | 23 (1.2)    | 61 (1.3)                                      | 33 (2.0)    | 18 (4.9)   | <0.001  | 112 (1.7)   | 38 (3.2)                                          | 13 (2.2)   | 8 (3.6)    | 0.416   | 59 (3.0)    | 174 (1.8)                                            | 127 (1.7)   | 76 (2.9)    | <0.001  | 377 (1.9)    |
| Local authorities such as prefectures and municipalities                                                                                                                             | 5711 (33.9)  | 2436 (24.7) | 525 (15.9)  | <0.001  | 8672 (28.9)  | 683 (44.5)                                 | 135 (36.4) | 29 (36.3) | 0.009*  | 847 (42.6)  | 2007 (43.1)                                   | 599 (37.2)  | 103 (28.3) | <0.001  | 2709 (40.8) | 386 (32.8)                                        | 179 (30.3) | 38 (16.9)  | <0.001  | 603 (30.3)  | 2635 (27.7)                                          | 1523 (20.9) | 355 (13.4)  | <0.001  | 4513 (23.2)  |
| Government                                                                                                                                                                           | 3729 (22.1)  | 1400 (14.2) | 354 (10.7)  | <0.001  | 5483 (18.2)  | 412 (26.8)                                 | 74 (19.9)  | 15 (18.8) | 0.009*  | 501 (25.2)  | 1203 (25.8)                                   | 316 (19.6)  | 60 (16.5)  | <0.001  | 1579 (23.8) | 272 (23.1)                                        | 87 (14.7)  | 24 (10.7)  | <0.001  | 383 (19.2)  | 1842 (19.4)                                          | 923 (12.6)  | 255 (9.7)   | <0.001  | 3020 (15.5)  |
| Medical task-force advising the government, known as the Novel Coronavirus Expert Meeting (re-established as Novel Coronavirus Infectious Disease Control Subcommittee in July 2020) | 1804 (10.7)  | 541 (5.5)   | 117 (3.5)   | <0.001  | 2462 (8.2)   | 227 (14.8)                                 | 32 (8.6)   | 9 (11.3)  | 0.006*  | 268 (13.5)  | 580 (12.4)                                    | 132 (8.2)   | 27 (7.4)   | <0.001  | 739 (11.1)  | 138 (11.7)                                        | 39 (6.6)   | 7 (3.1)    | <0.001  | 184 (9.2)   | 859 (9.0)                                            | 338 (4.6)   | 74 (2.8)    | <0.001  | 1271 (6.5)   |
| Friends                                                                                                                                                                              | 2218 (13.1)  | 1263 (12.8) | 323 (9.8)   | <0.001  | 3804 (12.7)  | 225 (14.7)                                 | 58 (15.6)  | 17 (21.3) | 0.262   | 300 (15.1)  | 785 (16.8)                                    | 299 (18.6)  | 55 (15.1)  | 0.163   | 1139 (17.2) | 129 (11.0)                                        | 83 (14.1)  | 20 (8.9)   | 0.062   | 232 (11.7)  | 1079 (11.4)                                          | 823 (11.3)  | 231 (8.7)   | <0.001  | 2133 (11.0)  |
| Family members                                                                                                                                                                       | 3175 (18.8)  | 1725 (17.5) | 427 (12.9)  | <0.001  | 5327 (17.7)  | 369 (24.0)                                 | 79 (21.3)  | 20 (25.0) | 0.510   | 468 (23.6)  | 1100 (23.6)                                   | 383 (23.8)  | 78 (21.4)  | 0.619   | 1563 (23.5) | 187 (15.9)                                        | 118 (20.0) | 28 (12.4)  | 0.018*  | 333 (16.7)  | 1519 (16.0)                                          | 1145 (15.7) | 301 (11.4)  | <0.001  | 2965 (15.3)  |
| Scientists and researchers                                                                                                                                                           | 518 (3.1)    | 196 (2.0)   | 110 (3.3)   | <0.001  | 824 (2.7)    | 73 (4.8)                                   | 15 (4.0)   | 8 (10.0)  | 0.076   | 96 (4.8)    | 187 (4.0)                                     | 51 (3.2)    | 29 (8.0)   | <0.001  | 267 (4.0)   | 37 (3.1)                                          | 16 (2.7)   | 8 (3.6)    | 0.796   | 61 (3.1)    | 221 (2.3)                                            | 114 (1.6)   | 65 (2.5)    | <0.001  | 400 (2.1)    |
| Pharmaceutical companies                                                                                                                                                             | 212 (1.3)    | 69 (0.7)    | 23 (0.7)    | <0.001  | 304 (1.0)    | 16 (1.0)                                   | 2 (0.5)    | 3 (3.8)   | 0.039*  | 21 (1.1)    | 35 (0.8)                                      | 15 (0.9)    | 4 (1.1)    | 0.647   | 54 (0.8)    | 21 (1.8)                                          | 8 (1.4)    | 2 (0.9)    | 0.545   | 31 (1.6)    | 140 (1.5)                                            | 44 (0.6)    | 14 (0.5)    | <0.001  | 198 (1.0)    |
| Other companies                                                                                                                                                                      | 264 (1.6)    | 396 (4.0)   | 239 (7.2)   | <0.001  | 899 (3.0)    | 9 (0.6)                                    | 3 (0.8)    | 3 (3.8)   | 0.006*  | 15 (0.8)    | 37 (0.8)                                      | 34 (2.1)    | 11 (3.0)   | <0.001  | 82 (1.2)    | 29 (2.5)                                          | 25 (4.2)   | 19 (8.4)   | <0.001  | 73 (3.7)    | 189 (2.0)                                            | 334 (4.6)   | 206 (7.8)   | <0.001  | 729 (3.8)    |

2

MA: multiple-answer question; \* Statistical significance disappeared after Bonferroni correction for multiple testing



1

## Supplementary Table 4: Trust in sources of COVID-19 information by three COVID-19 vaccine intention groups for pooled and by Groups (A–D), mean (95% confidence intervals)

|                                                                                                                                                                                      | Pooled           |                  |                  |         |             | Group (A) elderly with underlying diseases |                  |                  |         |             | Group (B) elderly without underlying diseases |                  |                  |         |             | Group (C) younger adults with underlying diseases |                  |                  |         |             | Group (D) younger adults without underlying diseases |                  |                  |         |             |  |
|--------------------------------------------------------------------------------------------------------------------------------------------------------------------------------------|------------------|------------------|------------------|---------|-------------|--------------------------------------------|------------------|------------------|---------|-------------|-----------------------------------------------|------------------|------------------|---------|-------------|---------------------------------------------------|------------------|------------------|---------|-------------|------------------------------------------------------|------------------|------------------|---------|-------------|--|
|                                                                                                                                                                                      | Yes              | Not sure         | No               | P-value | Total       | Yes                                        | Not sure         | No               | P-value | Total       | Yes                                           | Not sure         | No               | P-value | Total       | Yes                                               | Not sure         | No               | P-value | Total       | Yes                                                  | Not sure         | No               | P-value | Total       |  |
|                                                                                                                                                                                      | N = 16869        | N = 9874         | N = 3310         |         | N = 30053   | N = 1535                                   | N = 371          | N = 80           |         | N = 1986    | N = 4661                                      | N = 1611         | N = 364          |         | N = 6636    | N = 1176                                          | N = 590          | N = 225          |         | N = 1991    | N = 9497                                             | N = 7302         | N = 2541         |         | N = 19440   |  |
| <b>How much do you trust the information from each of these sources?</b>                                                                                                             |                  |                  |                  |         |             |                                            |                  |                  |         |             |                                               |                  |                  |         |             |                                                   |                  |                  |         |             |                                                      |                  |                  |         |             |  |
| Physicians                                                                                                                                                                           | 1.85 (1.84–1.86) | 1.64 (1.63–1.66) | 1.41 (1.38–1.44) | <0.001  | 1.73 (0.75) | 1.92 (1.89–1.96)                           | 1.77 (1.70–1.83) | 1.59 (1.43–1.75) | <0.001  | 1.88 (0.68) | 1.86 (1.84–1.88)                              | 1.65 (1.61–1.68) | 1.38 (1.30–1.45) | <0.001  | 1.78 (0.70) | 1.84 (1.79–1.88)                                  | 1.70 (1.64–1.76) | 1.41 (1.29–1.53) | <0.001  | 1.75 (0.83) | 1.83 (1.81–1.84)                                     | 1.63 (1.61–1.65) | 1.41 (1.38–1.44) | <0.001  | 1.70 (0.77) |  |
| Nurses                                                                                                                                                                               | 1.69 (1.68–1.70) | 1.53 (1.52–1.54) | 1.34 (1.32–1.37) | <0.001  | 1.60 (0.73) | 1.70 (1.66–1.73)                           | 1.60 (1.53–1.67) | 1.45 (1.29–1.61) | <0.001  | 1.67 (0.67) | 1.69 (1.67–1.71)                              | 1.53 (1.50–1.56) | 1.30 (1.22–1.37) | <0.001  | 1.63 (0.68) | 1.69 (1.64–1.73)                                  | 1.58 (1.52–1.64) | 1.40 (1.30–1.51) | <0.001  | 1.62 (0.78) | 1.69 (1.67–1.70)                                     | 1.52 (1.51–1.54) | 1.34 (1.31–1.37) | <0.001  | 1.58 (0.75) |  |
| Pharmacists                                                                                                                                                                          | 1.55 (1.54–1.56) | 1.41 (1.40–1.42) | 1.26 (1.23–1.28) | <0.001  | 1.47 (0.73) | 1.55 (1.52–1.58)                           | 1.43 (1.36–1.50) | 1.33 (1.17–1.48) | <0.001  | 1.52 (0.68) | 1.54 (1.52–1.56)                              | 1.40 (1.37–1.43) | 1.21 (1.14–1.28) | <0.001  | 1.49 (0.68) | 1.57 (1.53–1.62)                                  | 1.46 (1.40–1.52) | 1.29 (1.18–1.39) | <0.001  | 1.51 (0.78) | 1.56 (1.54–1.57)                                     | 1.41 (1.39–1.42) | 1.26 (1.23–1.29) | <0.001  | 1.46 (0.74) |  |
| Veterinarians                                                                                                                                                                        | 1.12 (1.11–1.13) | 1.05 (1.04–1.06) | 0.96 (0.94–0.98) | <0.001  | 1.08 (0.76) | 1.02 (0.98–1.06)                           | 0.99 (0.91–1.06) | 0.84 (0.69–0.98) | 0.125   | 1.00 (0.75) | 1.10 (1.07–1.12)                              | 1.00 (0.96–1.03) | 0.90 (0.83–0.98) | <0.001  | 1.06 (0.71) | 1.12 (1.07–1.17)                                  | 1.07 (1.01–1.14) | 1.09 (0.98–1.20) | 0.737   | 1.10 (0.81) | 1.15 (1.13–1.16)                                     | 1.06 (1.05–1.08) | 0.96 (0.93–0.99) | <0.001  | 1.09 (0.77) |  |
| Dentists                                                                                                                                                                             | 1.27 (1.26–1.29) | 1.16 (1.15–1.18) | 1.04 (1.01–1.06) | <0.001  | 1.21 (0.75) | 1.24 (1.21–1.28)                           | 1.20 (1.12–1.28) | 1.13 (0.96–1.29) | 0.301   | 1.23 (0.75) | 1.31 (1.29–1.33)                              | 1.18 (1.15–1.22) | 1.01 (0.94–1.08) | <0.001  | 1.27 (0.71) | 1.25 (1.21–1.30)                                  | 1.18 (1.12–1.24) | 1.12 (1.01–1.22) | 0.023*  | 1.22 (0.80) | 1.26 (1.25–1.28)                                     | 1.15 (1.14–1.17) | 1.03 (1.00–1.06) | <0.001  | 1.19 (0.76) |  |
| Health fairs and events                                                                                                                                                              | 1.04 (1.03–1.05) | 0.95 (0.94–0.97) | 0.84 (0.82–0.87) | <0.001  | 0.99 (0.71) | 0.97 (0.94–1.01)                           | 0.89 (0.82–0.96) | 0.70 (0.54–0.86) | <0.001  | 0.95 (0.69) | 1.05 (1.03–1.07)                              | 0.92 (0.89–0.95) | 0.75 (0.68–0.82) | <0.001  | 1.00 (0.66) | 1.04 (0.99–1.08)                                  | 0.94 (0.88–1.00) | 0.88 (0.77–0.98) | 0.002*  | 0.99 (0.76) | 1.05 (1.04–1.07)                                     | 0.96 (0.95–0.98) | 0.86 (0.83–0.89) | <0.001  | 0.99 (0.72) |  |
| Newspapers                                                                                                                                                                           | 1.38 (1.37–1.39) | 1.20 (1.19–1.22) | 0.98 (0.95–1.01) | <0.001  | 1.28 (0.74) | 1.45 (1.42–1.49)                           | 1.30 (1.22–1.37) | 1.08 (0.92–1.23) | <0.001  | 1.41 (0.71) | 1.48 (1.46–1.49)                              | 1.29 (1.26–1.32) | 0.98 (0.90–1.06) | <0.001  | 1.40 (0.69) | 1.29 (1.25–1.34)                                  | 1.13 (1.07–1.19) | 0.96 (0.85–1.07) | <0.001  | 1.21 (0.77) | 1.33 (1.31–1.34)                                     | 1.19 (1.17–1.20) | 0.98 (0.95–1.01) | <0.001  | 1.23 (0.75) |  |
| Magazines                                                                                                                                                                            | 0.99 (0.98–1.00) | 0.90 (0.89–0.92) | 0.81 (0.79–0.84) | <0.001  | 0.94 (0.71) | 0.93 (0.89–0.96)                           | 0.82 (0.75–0.88) | 0.71 (0.57–0.86) | <0.001  | 0.90 (0.67) | 0.98 (0.96–1.01)                              | 0.86 (0.83–0.90) | 0.70 (0.64–0.77) | <0.001  | 0.94 (0.68) | 0.92 (0.91–0.99)                                  | 0.79 (0.68–0.80) | 0.70 (0.68–0.80) | <0.001  | 0.80 (0.73) | 1.00 (0.99–1.02)                                     | 0.92 (0.91–0.94) | 0.83 (0.80–0.86) | <0.001  | 0.95 (0.71) |  |
| Books                                                                                                                                                                                | 1.09 (1.08–1.10) | 0.99 (0.98–1.01) | 0.91 (0.89–0.94) | <0.001  | 1.04 (0.68) | 1.02 (0.99–1.06)                           | 0.92 (0.86–0.99) | 0.81 (0.66–0.96) | <0.001  | 1.00 (0.66) | 1.09 (1.07–1.11)                              | 0.97 (0.93–1.00) | 0.88 (0.82–0.95) | <0.001  | 1.05 (0.65) | 1.03 (0.99–1.07)                                  | 0.94 (0.88–0.99) | 0.92 (0.81–1.02) | 0.004*  | 0.99 (0.72) | 1.11 (1.10–1.12)                                     | 1.01 (0.99–1.02) | 0.92 (0.89–0.95) | <0.001  | 1.05 (0.70) |  |
| Scientific literature                                                                                                                                                                | 1.48 (1.46–1.49) | 1.26 (1.24–1.27) | 1.13 (1.10–1.16) | <0.001  | 1.37 (0.73) | 1.53 (1.49–1.57)                           | 1.33 (1.26–1.40) | 1.23 (1.06–1.39) | <0.001  | 1.48 (0.72) | 1.52 (1.50–1.54)                              | 1.30 (1.26–1.33) | 1.20 (1.12–1.27) | <0.001  | 1.45 (0.71) | 1.45 (1.40–1.49)                                  | 1.21 (1.15–1.27) | 1.08 (0.97–1.20) | <0.001  | 1.34 (0.79) | 1.45 (1.43–1.46)                                     | 1.25 (1.23–1.27) | 1.12 (1.09–1.15) | <0.001  | 1.33 (0.73) |  |
| Television                                                                                                                                                                           | 1.31 (1.30–1.33) | 1.17 (1.16–1.18) | 0.92 (0.89–0.95) | <0.001  | 1.22 (0.73) | 1.41 (1.37–1.44)                           | 1.29 (1.21–1.36) | 1.05 (0.91–1.19) | <0.001  | 1.37 (0.70) | 1.40 (1.38–1.42)                              | 1.23 (1.20–1.26) | 0.86 (0.78–0.93) | <0.001  | 1.33 (0.68) | 1.29 (1.24–1.33)                                  | 1.11 (1.05–1.17) | 0.96 (0.84–1.08) | <0.001  | 1.20 (0.78) | 1.26 (1.25–1.28)                                     | 1.16 (1.14–1.17) | 0.92 (0.89–0.95) | <0.001  | 1.18 (0.74) |  |
| Radio                                                                                                                                                                                | 1.23 (1.22–1.24) | 1.08 (1.07–1.10) | 0.88 (0.85–0.90) | <0.001  | 1.14 (0.70) | 1.30 (1.27–1.34)                           | 1.19 (1.12–1.25) | 1.03 (0.89–1.16) | <0.001  | 1.27 (0.68) | 1.31 (1.30–1.33)                              | 1.16 (1.13–1.19) | 0.85 (0.78–0.92) | <0.001  | 1.25 (0.66) | 1.18 (1.14–1.22)                                  | 1.00 (0.94–1.06) | 0.91 (0.80–1.01) | <0.001  | 1.09 (0.73) | 1.18 (1.17–1.20)                                     | 1.07 (1.05–1.08) | 0.88 (0.85–0.90) | <0.001  | 1.10 (0.70) |  |
| Internet news sites                                                                                                                                                                  | 1.12 (1.11–1.13) | 1.04 (1.03–1.06) | 0.93 (0.91–0.96) | <0.001  | 1.08 (0.67) | 1.12 (1.08–1.15)                           | 1.01 (0.94–1.07) | 0.95 (0.80–1.10) | 0.002*  | 1.09 (0.67) | 1.14 (1.12–1.16)                              | 1.04 (1.01–1.07) | 0.92 (0.86–0.99) | <0.001  | 1.10 (0.65) | 1.11 (1.07–1.16)                                  | 1.04 (0.98–1.09) | 0.95 (0.86–1.05) | 0.002*  | 1.07 (0.71) | 1.12 (1.10–1.13)                                     | 1.05 (1.03–1.06) | 0.93 (0.91–0.96) | <0.001  | 1.06 (0.68) |  |
| Search engines (Google, Yahoo, etc.)                                                                                                                                                 | 1.06 (1.05–1.07) | 0.99 (0.97–1.00) | 0.93 (0.91–0.96) | <0.001  | 1.02 (0.67) | 1.04 (1.00–1.07)                           | 0.91 (0.85–0.98) | 0.93 (0.77–1.08) | 0.002*  | 1.01 (0.66) | 1.05 (1.04–1.07)                              | 0.95 (0.92–0.98) | 0.87 (0.81–0.94) | <0.001  | 1.02 (0.65) | 1.08 (1.04–1.12)                                  | 0.97 (0.92–1.03) | 0.93 (0.83–1.04) | <0.001  | 1.01 (0.71) | 1.07 (1.06–1.08)                                     | 1.00 (0.98–1.01) | 0.94 (0.91–0.97) | <0.001  | 1.02 (0.67) |  |
| LINE                                                                                                                                                                                 | 0.74 (0.73–0.75) | 0.70 (0.69–0.72) | 0.65 (0.62–0.67) | <0.001  | 0.72 (0.71) | 0.68 (0.65–0.72)                           | 0.53 (0.47–0.60) | 0.51 (0.37–0.65) | <0.001  | 0.65 (0.68) | 0.68 (0.66–0.70)                              | 0.61 (0.58–0.64) | 0.49 (0.43–0.56) | <0.001  | 0.65 (0.68) | 0.78 (0.73–0.82)                                  | 0.65 (0.59–0.70) | 0.70 (0.59–0.80) | 0.006*  | 0.73 (0.75) | 0.77 (0.76–0.79)                                     | 0.74 (0.72–0.75) | 0.67 (0.64–0.70) | <0.001  | 0.75 (0.71) |  |
| Facebook                                                                                                                                                                             | 0.57 (0.56–0.58) | 0.56 (0.55–0.57) | 0.57 (0.54–0.59) | 0.382   | 0.57 (0.68) | 0.51 (0.47–0.54)                           | 0.40 (0.34–0.46) | 0.46 (0.32–0.60) | 0.023*  | 0.49 (0.66) | 0.50 (0.49–0.52)                              | 0.47 (0.44–0.50) | 0.43 (0.37–0.49) | 0.031*  | 0.49 (0.63) | 0.62 (0.57–0.66)                                  | 0.51 (0.46–0.56) | 0.60 (0.50–0.70) | 0.129   | 0.58 (0.74) | 0.61 (0.60–0.63)                                     | 0.59 (0.58–0.61) | 0.59 (0.56–0.61) | 0.046*  | 0.60 (0.69) |  |
| Twitter                                                                                                                                                                              | 0.56 (0.55–0.57) | 0.58 (0.56–0.59) | 0.61 (0.59–0.64) | 0.001   | 0.57 (0.69) | 0.47 (0.43–0.50)                           | 0.39 (0.33–0.45) | 0.45 (0.32–0.58) | 0.203   | 0.45 (0.65) | 0.47 (0.45–0.49)                              | 0.45 (0.42–0.48) | 0.43 (0.36–0.49) | 0.314   | 0.46 (0.62) | 0.61 (0.57–0.66)                                  | 0.54 (0.48–0.59) | 0.64 (0.54–0.75) | 0.338   | 0.59 (0.74) | 0.62 (0.60–0.63)                                     | 0.62 (0.60–0.63) | 0.64 (0.61–0.67) | 0.608   | 0.62 (0.71) |  |
| Instagram                                                                                                                                                                            | 0.53 (0.52–0.54) | 0.54 (0.53–0.55) | 0.55 (0.53–0.58) | 0.130   | 0.54 (0.68) | 0.44 (0.41–0.47)                           | 0.37 (0.31–0.43) | 0.39 (0.25–0.52) | 0.264   | 0.43 (0.64) | 0.46 (0.44–0.48)                              | 0.44 (0.41–0.47) | 0.38 (0.32–0.44) | 0.033*  | 0.45 (0.62) | 0.57 (0.52–0.63)                                  | 0.48 (0.43–0.53) | 0.57 (0.47–0.68) | 0.216   | 0.54 (0.72) | 0.57 (0.56–0.59)                                     | 0.57 (0.56–0.59) | 0.58 (0.55–0.61) | 0.489   | 0.58 (0.69) |  |
| YouTube                                                                                                                                                                              | 0.58 (0.57–0.59) | 0.59 (0.58–0.60) | 0.67 (0.64–0.69) | <0.001  | 0.59 (0.69) | 0.51 (0.48–0.55)                           | 0.47 (0.40–0.53) | 0.56 (0.41–0.71) | 0.319   | 0.51 (0.66) | 0.52 (0.50–0.54)                              | 0.51 (0.48–0.54) | 0.57 (0.50–0.63) | 0.343   | 0.52 (0.63) | 0.63 (0.59–0.67)                                  | 0.55 (0.50–0.61) | 0.66 (0.56–0.77) | 0.253   | 0.61 (0.74) | 0.62 (0.60–0.63)                                     | 0.62 (0.60–0.63) | 0.69 (0.66–0.71) | 0.002*  | 0.63 (0.70) |  |
| TikTok                                                                                                                                                                               | 0.44 (0.43–0.45) | 0.44 (0.42–0.45) | 0.45 (0.42–0.47) | 0.359   | 0.44 (0.64) | 0.39 (0.35–0.42)                           | 0.33 (0.27–0.39) | 0.34 (0.21–0.47) | 0.293   | 0.37 (0.62) | 0.39 (0.37–0.41)                              | 0.39 (0.36–0.42) | 0.33 (0.27–0.39) | 0.053   | 0.39 (0.60) | 0.48 (0.44–0.52)                                  | 0.37 (0.33–0.42) | 0.52 (0.41–0.62) | 0.101   | 0.45 (0.72) | 0.46 (0.45–0.47)                                     | 0.46 (0.44–0.47) | 0.46 (0.43–0.49) | 0.285   | 0.46 (0.67) |  |
| Medical information sites                                                                                                                                                            | 1.26 (1.25–1.27) | 1.10 (1.09–1.12) | 0.96 (0.93–0.99) | <0.001  | 1.18 (0.73) | 1.32 (1.28–1.35)                           | 1.14 (1.07–1.21) | 1.03 (0.86–1.19) | <0.001  | 1.27 (0.71) | 1.29 (1.27–1.31)                              | 1.14 (1.10–1.17) | 0.95 (0.88–1.02) | <0.001  | 1.23 (0.70) | 1.31 (1.27–1.36)                                  | 1.07 (1.01–1.13) | 1.00 (0.88–1.12) | <0.001  | 1.21 (0.79) | 1.23 (1.22–1.25)                                     | 1.10 (1.08–1.11) | 0.96 (0.93–0.99) | <0.001  | 1.15 (0.74) |  |
| Blogs or web pages of celebrities and famous people                                                                                                                                  | 0.65 (0.64–0.66) | 0.64 (0.62–0.65) | 0.59 (0.57–0.62) | <0.001  | 0.64 (0.68) | 0.60 (0.56–0.63)                           | 0.52 (0.46–0.58) | 0.56 (0.41–0.72) | 0.221   | 0.58 (0.67) | 0.61 (0.60–0.63)                              | 0.55 (0.52–0.58) | 0.42 (0.36–0.48) | <0.001  | 0.59 (0.65) | 0.69 (0.64–0.73)                                  | 0.59 (0.54–0.64) | 0.60 (0.49–0.70) | 0.035*  | 0.65 (0.72) | 0.67 (0.66–0.69)                                     | 0.66 (0.65–0.68) | 0.61 (0.59–0.64) | <0.001  | 0.66 (0.71) |  |
| Local authorities such as prefectures and municipalities                                                                                                                             | 1.52 (1.51–1.54) | 1.30 (1.28–1.31) | 1.05 (1.02–1.08) | <0.001  | 1.40 (0.75) | 1.59 (1.56–1.63)                           | 1.40 (1.32–1.47) | 1.18 (1.00–1.35) | <0.001  | 1.54 (0.72) | 1.59 (1.57–1.61)                              | 1.37 (1.31–1.40) | 1.07 (1.00–1.15) | <0.001  | 1.51 (0.70) | 1.52 (1.48–1.57)                                  | 1.25 (1.19–1.30) | 1.02 (0.91–1.14) | <0.001  | 1.38 (0.79) | 1.48 (1.47–1.50)                                     | 1.28 (1.26–1.30) | 1.04 (1.01–1.07) | <0.001  | 1.35 (0.76) |  |
| Government                                                                                                                                                                           | 1.36 (1.35–1.37) | 1.11 (1.09–1.12) | 0.90 (0.87–0.92) | <0.001  | 1.23 (0.79) | 1.39 (1.35–1.42)                           | 1.11 (1.04–1.18) | 0.95 (0.77–1.13) | <0.001  | 1.32 (0.78) | 1.40 (1.38–1.42)                              | 1.12 (1.09–1.16) | 0.85 (0.77–0.92) | <0.001  | 1.30 (0.76) | 1.35 (1.30–1.39)                                  | 1.04 (0.98–1.11) | 0.90 (0.79–1.01) | <0.001  | 1.21 (0.82) | 1.34 (1.33–1.36)                                     | 1.11 (1.09–1.13) | 0.90 (0.87–0.93) | <0.001  | 1.19 (0.79) |  |
| Medical task-force advising the government, known as the Novel Coronavirus Expert Meeting (re-established as Novel Coronavirus Infectious Disease Control Subcommittee in July 2020) | 1.59 (1.58–1.60) | 1.32 (1.31–1.34) | 1.05 (1.02–1.07) | <0.001  | 1.44 (0.81) | 1.67 (1.64–1.71)                           | 1.45 (1.37–1.53) | 1.18 (0.98–1.37) | <0.001  | 1.61 (0.79) | 1.67 (1.65–1.69)                              | 1.41 (1.38–1.45) | 1.08 (1.00–1.17) | <0.001  | 1.58 (0.78) | 1.56 (1.51–1.61)                                  | 1.29 (1.23–1.35) | 1.03 (0.91–1.14) | <0.001  | 1.42 (0.85) | 1.54 (1.52–1.56)                                     | 1.30 (1.28–1.32) | 1.04 (1.01–1.07) | <0.001  | 1.38 (0.80) |  |
| Friends                                                                                                                                                                              | 1.00 (0.99–1.01) | 0.96 (0.95–0.98) | 0.91 (0.88–0.93) | <0.001  | 0.98 (0.69) | 0.95 (0.92–0.98)                           | 0.93 (0.87–1.00) | 0.79 (0.64–0.93) | 0.081   | 0.94 (0.65) | 1.01 (0.99–1.0                                |                  |                  |         |             |                                                   |                  |                  |         |             |                                                      |                  |                  |         |             |  |

1 **Supplementary Table 5: Odds ratios (95% confidence intervals) for responding ‘not sure’ or ‘no’ regarding**  
 2 **intention to be vaccinated**

|                                                                                                       | Not sure, N = 9874 | P value | No, N = 3310     | P value |
|-------------------------------------------------------------------------------------------------------|--------------------|---------|------------------|---------|
| <b>COVID-19 pandemic situation</b>                                                                    |                    |         |                  |         |
| Total number of COVID-19 infected cases in residential prefectures as of February 16, 2021            | 1.00 (1.00–1.00)   | 0.779   | 1.00 (1.00–1.00) | 0.291   |
| Number of COVID-19 infected cases in residential prefectures between 16 January and February 16, 2021 | 1.00 (1.00–1.00)   | 0.421   | 1.00 (1.00–1.00) | 0.268   |
| <b>Sociodemographic characteristics</b>                                                               |                    |         |                  |         |
| Age (SA)                                                                                              | 0.98 (0.98–0.99)   | <0.001  | 0.97 (0.96–0.97) | <0.001  |
| <b>Gender (SA)</b>                                                                                    |                    |         |                  |         |
| Women                                                                                                 | 1.53 (1.41–1.66)   | <0.001  | 1.56 (1.37–1.78) | <0.001  |
| Men                                                                                                   | 1.00 (1.00–1.00)   | <0.001  | 1.00 (reference) | NA      |
| Other                                                                                                 | 1.92 (0.81–4.57)   | 0.141   | 1.41 (0.44–4.45) | 0.563   |
| <b>Prefecture (SA)</b>                                                                                |                    |         |                  |         |
| Hokkaido                                                                                              | 1.08 (0.93–1.26)   | 0.296   | 0.99 (0.77–1.27) | 0.937   |
| Aomori                                                                                                | 0.88 (0.61–1.27)   | 0.497   | 1.39 (0.82–2.36) | 0.217   |
| Iwate                                                                                                 | 1.09 (0.77–1.54)   | 0.641   | 1.09 (0.61–1.97) | 0.764   |
| Miyagi                                                                                                | 0.93 (0.73–1.18)   | 0.554   | 1.02 (0.69–1.52) | 0.909   |
| Akita                                                                                                 | 1.05 (0.71–1.55)   | 0.818   | 1.38 (0.71–2.68) | 0.346   |
| Yamagata                                                                                              | 1.05 (0.71–1.55)   | 0.814   | 1.07 (0.57–2.01) | 0.838   |
| Fukushima                                                                                             | 0.88 (0.64–1.22)   | 0.450   | 0.80 (0.48–1.34) | 0.397   |
| Ibaraki                                                                                               | 1.02 (0.79–1.32)   | 0.867   | 0.97 (0.64–1.47) | 0.885   |
| Tochigi                                                                                               | 1.12 (0.81–1.55)   | 0.495   | 0.80 (0.45–1.40) | 0.429   |
| Gunma                                                                                                 | 0.70 (0.50–0.99)   | 0.047   | 0.69 (0.39–1.20) | 0.187   |
| Saitama                                                                                               | 1.20 (1.05–1.37)   | 0.007   | 1.25 (1.01–1.56) | 0.043   |
| Chiba                                                                                                 | 1.02 (0.90–1.16)   | 0.775   | 0.97 (0.79–1.21) | 0.813   |
| Tokyo                                                                                                 | 1.00 (reference)   | NA      | 1.00 (reference) | NA      |
| Kanagawa                                                                                              | 1.05 (0.92–1.19)   | 0.483   | 0.98 (0.80–1.21) | 0.876   |
| Niigata                                                                                               | 1.04 (0.82–1.31)   | 0.745   | 0.80 (0.52–1.25) | 0.330   |
| Toyama                                                                                                | 0.77 (0.55–1.09)   | 0.143   | 1.16 (0.66–2.03) | 0.599   |
| Ishikawa                                                                                              | 0.77 (0.54–1.10)   | 0.155   | 0.75 (0.41–1.36) | 0.344   |
| Fukui                                                                                                 | 1.58 (1.00–2.49)   | 0.050   | 0.75 (0.31–1.83) | 0.527   |
| Yamanashi                                                                                             | 0.78 (0.51–1.19)   | 0.246   | 1.62 (0.86–3.05) | 0.135   |
| Nagano                                                                                                | 1.08 (0.84–1.38)   | 0.565   | 1.10 (0.73–1.66) | 0.654   |
| Gifu                                                                                                  | 1.04 (0.78–1.39)   | 0.779   | 1.37 (0.87–2.14) | 0.170   |
| Shizuoka                                                                                              | 0.99 (0.80–1.23)   | 0.931   | 0.83 (0.57–1.20) | 0.320   |
| Aichi                                                                                                 | 0.95 (0.83–1.09)   | 0.446   | 0.98 (0.79–1.23) | 0.893   |
| Mie                                                                                                   | 0.83 (0.63–1.10)   | 0.206   | 0.87 (0.53–1.44) | 0.599   |
| Shiga                                                                                                 | 0.99 (0.69–1.44)   | 0.966   | 1.23 (0.70–2.15) | 0.478   |
| Kyoto                                                                                                 | 0.93 (0.74–1.17)   | 0.532   | 1.06 (0.73–1.52) | 0.770   |
| Osaka                                                                                                 | 1.16 (1.02–1.32)   | 0.026   | 1.01 (0.82–1.25) | 0.896   |
| Hyogo                                                                                                 | 1.01 (0.86–1.18)   | 0.936   | 1.23 (0.96–1.58) | 0.102   |
| Nara                                                                                                  | 1.21 (0.88–1.68)   | 0.240   | 1.42 (0.86–2.36) | 0.171   |
| Wakayama                                                                                              | 0.54 (0.33–0.89)   | 0.016   | 0.42 (0.19–0.94) | 0.035   |
| Tottori                                                                                               | 0.99 (0.59–1.64)   | 0.954   | 1.24 (0.56–2.76) | 0.601   |
| Shimane                                                                                               | 0.81 (0.51–1.30)   | 0.386   | 0.11 (0.03–0.38) | <0.001  |
| Okayama                                                                                               | 1.26 (0.98–1.61)   | 0.073   | 1.75 (1.17–2.60) | 0.006   |
| Hiroshima                                                                                             | 1.11 (0.90–1.38)   | 0.331   | 1.37 (0.97–1.94) | 0.070   |
| Yamaguchi                                                                                             | 0.95 (0.67–1.35)   | 0.772   | 0.62 (0.34–1.15) | 0.129   |
| Tokushima                                                                                             | 0.99 (0.64–1.52)   | 0.958   | 1.68 (0.86–3.30) | 0.132   |
| Kagawa                                                                                                | 1.26 (0.89–1.80)   | 0.196   | 1.09 (0.60–1.98) | 0.786   |
| Ehime                                                                                                 | 0.91 (0.68–1.22)   | 0.541   | 1.21 (0.76–1.94) | 0.415   |
| Kochi                                                                                                 | 1.26 (0.73–2.19)   | 0.402   | 1.78 (0.77–4.12) | 0.179   |

|                                                                                                                                                                     |                         |              |                         |              |
|---------------------------------------------------------------------------------------------------------------------------------------------------------------------|-------------------------|--------------|-------------------------|--------------|
| Fukuoka                                                                                                                                                             | 1.06 (0.92–1.23)        | 0.425        | 1.14 (0.90–1.44)        | 0.290        |
| Saga                                                                                                                                                                | 1.14 (0.75–1.73)        | 0.546        | 1.36 (0.65–2.86)        | 0.416        |
| Nagasaki                                                                                                                                                            | 1.10 (0.79–1.53)        | 0.577        | 0.93 (0.53–1.64)        | 0.807        |
| Kumamoto                                                                                                                                                            | 0.86 (0.64–1.16)        | 0.324        | 0.86 (0.53–1.40)        | 0.535        |
| Oita                                                                                                                                                                | 0.96 (0.65–1.40)        | 0.823        | 1.40 (0.75–2.61)        | 0.291        |
| Miyazaki                                                                                                                                                            | 0.94 (0.62–1.43)        | 0.781        | 0.98 (0.50–1.93)        | 0.950        |
| Kagoshima                                                                                                                                                           | 0.73 (0.51–1.03)        | 0.074        | 1.48 (0.88–2.51)        | 0.142        |
| Okinawa                                                                                                                                                             | 1.40 (0.97–2.03)        | 0.069        | 1.07 (0.60–1.91)        | 0.824        |
| <b>Highest educational level (SA)</b>                                                                                                                               | <b>0.97 (0.93–1.00)</b> | <b>0.066</b> | <b>1.00 (0.94–1.06)</b> | <b>0.936</b> |
| <b>Occupation type (SA)</b>                                                                                                                                         |                         |              |                         |              |
| Agriculture, forestry and fisheries                                                                                                                                 | 2.23 (1.43–3.49)        | <0.001       | 0.54 (0.26–1.13)        | 0.102        |
| Construction                                                                                                                                                        | 1.55 (1.22–1.99)        | <0.001       | 1.22 (0.84–1.76)        | 0.291        |
| Manufacturing                                                                                                                                                       | 1.74 (1.45–2.09)        | <0.001       | 0.97 (0.73–1.30)        | 0.860        |
| Information and communications                                                                                                                                      | 1.90 (1.47–2.44)        | <0.001       | 1.00 (0.68–1.47)        | 0.999        |
| Transportation and postal services                                                                                                                                  | 2.33 (1.81–3.01)        | <0.001       | 1.37 (0.93–2.02)        | 0.113        |
| Wholesale and retail trade                                                                                                                                          | 1.98 (1.63–2.41)        | <0.001       | 0.99 (0.72–1.35)        | 0.926        |
| Finance and insurance                                                                                                                                               | 2.12 (1.63–2.77)        | <0.001       | 1.67 (1.12–2.50)        | 0.012        |
| Real estate and goods rental and leasing                                                                                                                            | 1.94 (1.41–2.67)        | <0.001       | 1.02 (0.61–1.69)        | 0.945        |
| Scientific research, professional and technical services                                                                                                            | 1.69 (1.22–2.34)        | 0.002        | 1.01 (0.60–1.69)        | 0.981        |
| Accommodations, food and beverage services                                                                                                                          | 1.65 (1.27–2.15)        | <0.001       | 0.82 (0.54–1.26)        | 0.370        |
| Living-related and personal services and amusement services                                                                                                         | 2.03 (1.50–2.73)        | <0.001       | 1.47 (0.93–2.33)        | 0.100        |
| Education and learning support                                                                                                                                      | 1.72 (1.36–2.18)        | <0.001       | 1.19 (0.82–1.71)        | 0.362        |
| Healthcare and welfare                                                                                                                                              | 1.00 (reference)        | NA           | 1.00 (reference)        | NA           |
| Combined services                                                                                                                                                   | 1.33 (0.87–2.03)        | 0.186        | 1.57 (0.88–2.80)        | 0.123        |
| Services (not elsewhere classified)                                                                                                                                 | 1.63 (1.35–1.97)        | <0.001       | 1.13 (0.84–1.50)        | 0.423        |
| Public service (not elsewhere classified)                                                                                                                           | 1.69 (1.32–2.16)        | <0.001       | 1.43 (0.99–2.09)        | 0.060        |
| Students                                                                                                                                                            | 2.32 (1.76–3.06)        | <0.001       | 1.06 (0.70–1.58)        | 0.794        |
| Homemaker                                                                                                                                                           | 1.83 (1.55–2.17)        | <0.001       | 1.14 (0.87–1.50)        | 0.325        |
| Others                                                                                                                                                              | 2.06 (1.72–2.46)        | <0.001       | 1.30 (0.99–1.72)        | 0.059        |
| <b>Annual household income in 2020 (SA)</b>                                                                                                                         | <b>0.99 (0.98–1.00)</b> | <b>0.217</b> | <b>1.01 (0.99–1.03)</b> | <b>0.548</b> |
| <b>Healthcare-related characteristics, including health literacy</b>                                                                                                |                         |              |                         |              |
| <b>Self-reported health status (SA)</b>                                                                                                                             |                         |              |                         |              |
| Very good                                                                                                                                                           | 0.95 (0.86–1.05)        | 0.318        | 0.94 (0.80–1.10)        | 0.459        |
| Good                                                                                                                                                                | 1.00 (0.91–1.09)        | 0.998        | 1.00 (0.86–1.16)        | 0.957        |
| Fair                                                                                                                                                                | 1.00 (reference)        | NA           | 1.00 (reference)        | NA           |
| Poor                                                                                                                                                                | 1.23 (1.08–1.39)        | 0.001        | 1.15 (0.94–1.41)        | 0.186        |
| Very poor                                                                                                                                                           | 1.36 (1.06–1.73)        | 0.015        | 1.07 (0.74–1.53)        | 0.722        |
| <b>Have you ever received a COVID-19 test? (SA)</b>                                                                                                                 |                         |              |                         |              |
| No                                                                                                                                                                  | 1.35 (0.82–2.23)        | 0.235        | 0.61 (0.27–1.36)        | 0.224        |
| Yes – PCR test                                                                                                                                                      | 1.08 (0.67–1.77)        | 0.745        | 0.41 (0.19–0.90)        | 0.025        |
| Yes – antigen test                                                                                                                                                  | 0.80 (0.51–1.27)        | 0.352        | 0.72 (0.34–1.53)        | 0.393        |
| Yes – antibody testing                                                                                                                                              | 0.89 (0.54–1.46)        | 0.651        | 0.57 (0.25–1.30)        | 0.181        |
| Yes – unsure about either of the three                                                                                                                              | 1.37 (0.77–2.44)        | 0.282        | 0.68 (0.28–1.65)        | 0.392        |
| Absence of underlying diseases (e.g. diabetes, heart failure, respiratory disease, COPD, etc., or on dialysis, or using immunosuppressive or anticancer drugs) (SA) | 1.22 (1.09–1.37)        | <0.001       | 1.20 (0.99–1.45)        | 0.068        |
| <b>Preventive measures against COVID-19 (MA)</b>                                                                                                                    |                         |              |                         |              |
| Avoid going to places with poor ventilation                                                                                                                         | 0.90 (0.83–0.97)        | 0.009        | 0.95 (0.83–1.09)        | 0.455        |
| Avoid going to places where there are many people gathered                                                                                                          | 1.08 (0.98–1.19)        | 0.122        | 1.09 (0.94–1.26)        | 0.274        |
| Avoid talking or speaking in close proximity to other people                                                                                                        | 0.96 (0.88–1.04)        | 0.287        | 1.06 (0.92–1.22)        | 0.426        |
| Washing hands, gargling, and hand disinfection with alcohol.                                                                                                        | 1.06 (0.95–1.18)        | 0.311        | 0.84 (0.71–0.98)        | 0.027        |
| Etiquette (masks, handkerchiefs, etc.) in case of coughing or sneezing                                                                                              | 1.09 (1.00–1.19)        | 0.055        | 0.93 (0.80–1.07)        | 0.285        |
| Telework                                                                                                                                                            | 0.97 (0.84–1.11)        | 0.645        | 0.99 (0.79–1.23)        | 0.898        |
| Be conscious of social distancing                                                                                                                                   | 1.01 (0.93–1.10)        | 0.789        | 0.99 (0.86–1.15)        | 0.942        |
| Avoid going out unnecessarily.                                                                                                                                      | 1.08 (0.99–1.17)        | 0.074        | 0.89 (0.78–1.02)        | 0.099        |

|                                                                                                                                                 |                  |        |                  |        |
|-------------------------------------------------------------------------------------------------------------------------------------------------|------------------|--------|------------------|--------|
| Other preventive measures                                                                                                                       | 1.03 (0.84–1.27) | 0.767  | 1.02 (0.74–1.41) | 0.902  |
| No preventive measures                                                                                                                          | 0.94 (0.76–1.16) | 0.562  | 0.96 (0.73–1.24) | 0.733  |
| Have you ever refrained from visiting a medical institution because you were anxious about being infected by the new coronavirus? (MA)          |                  |        |                  |        |
| Have refrained from regular hospital visits                                                                                                     | 0.96 (0.83–1.11) | 0.599  | 0.80 (0.63–1.03) | 0.080  |
| Have refrained from visiting the hospital for sudden symptoms such as a cold, headache, or stomachache                                          | 1.06 (0.91–1.23) | 0.445  | 0.93 (0.72–1.19) | 0.544  |
| Have refrained from medical checkups, physical examinations, or cancer screenings                                                               | 1.05 (0.91–1.21) | 0.481  | 1.07 (0.83–1.36) | 0.605  |
| Have refrained from other medical examinations                                                                                                  | 1.08 (0.92–1.26) | 0.341  | 1.05 (0.81–1.36) | 0.730  |
| No                                                                                                                                              | 1.21 (1.04–1.41) | 0.012  | 1.09 (0.85–1.41) | 0.485  |
| How confident are you filling out medical forms by yourself? (health literacy) (SA)                                                             |                  |        |                  |        |
| Not at all                                                                                                                                      | 1.06 (0.78–1.44) | 0.707  | 1.25 (0.85–1.85) | 0.257  |
| A little bit                                                                                                                                    | 0.99 (0.83–1.17) | 0.868  | 1.25 (0.98–1.60) | 0.072  |
| Somewhat                                                                                                                                        | 1.00 (reference) | NA     | 1.00 (reference) | NA     |
| Extremely                                                                                                                                       | 1.05 (0.96–1.15) | 0.279  | 1.14 (0.99–1.32) | 0.076  |
| Quite a bit                                                                                                                                     | 1.10 (0.99–1.23) | 0.086  | 1.38 (1.16–1.64) | <0.001 |
| <b>Psychological characteristics</b>                                                                                                            |                  |        |                  |        |
| How anxious are you about COVID-19? (SA) – perceived risks of COVID-19                                                                          |                  |        |                  |        |
| Not at all anxious                                                                                                                              | 0.87 (0.71–1.06) | 0.167  | 1.58 (1.20–2.07) | <0.001 |
| Vaguely anxious                                                                                                                                 | 0.98 (0.85–1.15) | 0.838  | 0.97 (0.77–1.21) | 0.769  |
| Have a clear sense of anxiety                                                                                                                   | 0.82 (0.70–0.96) | 0.012  | 0.83 (0.65–1.05) | 0.122  |
| Feel fear and have anxiety                                                                                                                      | 1.00 (reference) | NA     | 1.00 (reference) | NA     |
| What is your best guess as to whether you will get COVID-19 within the next 6 months? (SA) – perceived risks of COVID-19                        |                  |        |                  |        |
| I don't think I will get COVID-19                                                                                                               | 1.20 (1.07–1.35) | 0.002  | 1.35 (1.12–1.64) | 0.002  |
| I think I will get a mild case of COVID-19                                                                                                      | 0.97 (0.87–1.10) | 0.672  | 0.91 (0.74–1.11) | 0.340  |
| I think I will get seriously ill from COVID-19                                                                                                  | 1.00 (reference) | NA     | 1.00 (reference) | NA     |
| I have already had COVID-19                                                                                                                     | 4.25 (2.79–6.47) | <0.001 | 2.62 (1.55–4.42) | <0.001 |
| How do you think the disadvantages of the COVID-19 vaccine are? (SA) – perceived risks of a COVID-19 vaccine                                    |                  |        |                  |        |
| Very small                                                                                                                                      | 0.24 (0.20–0.29) | <0.001 | 0.15 (0.10–0.21) | <0.001 |
| Small                                                                                                                                           | 0.45 (0.41–0.49) | <0.001 | 0.44 (0.37–0.52) | <0.001 |
| Medium                                                                                                                                          | 1.00 (reference) | NA     | 1.00 (reference) | NA     |
| Large                                                                                                                                           | 1.21 (1.08–1.36) | <0.001 | 1.91 (1.63–2.24) | <0.001 |
| Very large                                                                                                                                      | 2.53 (1.84–3.49) | <0.001 | 3.90 (2.66–5.72) | <0.001 |
| Do you think getting a COVID-19 vaccine will ease your anxiety? (SA) – perceived benefits of a COVID-19 vaccine                                 |                  |        |                  |        |
| Strongly disagree                                                                                                                               | 1.55 (1.18–2.03) | 0.002  | 2.81 (2.07–3.81) | <0.001 |
| Disagree                                                                                                                                        | 1.24 (1.12–1.38) | <0.001 | 1.77 (1.52–2.06) | <0.001 |
| Neither agree nor disagree                                                                                                                      | 1.00 (reference) | NA     | 1.00 (reference) | NA     |
| Agree                                                                                                                                           | 0.57 (0.53–0.62) | <0.001 | 0.61 (0.52–0.73) | <0.001 |
| Strongly agree                                                                                                                                  | 0.74 (0.54–1.00) | 0.050  | 1.09 (0.63–1.89) | 0.761  |
| If others have been vaccinated against COVID-19, do you think you should be vaccinated as well? (SA) – perceived norms about a COVID-19 vaccine |                  |        |                  |        |
| Strongly disagree                                                                                                                               | 0.40 (0.29–0.54) | <0.001 | 5.67 (4.16–7.73) | <0.001 |
| Disagree                                                                                                                                        | 0.80 (0.70–0.91) | <0.001 | 3.55 (3.03–4.16) | <0.001 |
| Neither agree nor disagree                                                                                                                      | 1.00 (reference) | NA     | 1.00 (reference) | NA     |
| Agree                                                                                                                                           | 0.27 (0.25–0.29) | <0.001 | 0.14 (0.12–0.17) | <0.001 |
| Strongly agree                                                                                                                                  | 0.03 (0.02–0.04) | <0.001 | 0.03 (0.02–0.05) | <0.001 |
| Do you trust scientists in the field of vaccine development for COVID-19? (SA) – trusts about COVID-19 vaccine                                  |                  |        |                  |        |

|                                                                                                                                                                                      |                  |        |                  |        |
|--------------------------------------------------------------------------------------------------------------------------------------------------------------------------------------|------------------|--------|------------------|--------|
| Strongly distrust                                                                                                                                                                    | 0.71 (0.44–1.16) | 0.177  | 0.76 (0.44–1.30) | 0.315  |
| Distrust                                                                                                                                                                             | 0.89 (0.74–1.07) | 0.196  | 1.01 (0.80–1.27) | 0.945  |
| Neutral                                                                                                                                                                              | 1.00 (reference) | NA     | 1.00 (reference) | NA     |
| Trust                                                                                                                                                                                | 0.71 (0.64–0.78) | <0.001 | 0.89 (0.74–1.06) | 0.178  |
| Strongly trust                                                                                                                                                                       | 0.71 (0.51–0.99) | 0.047  | 0.55 (0.31–0.99) | 0.048  |
| <b>Do you trust the public authorities to approve vaccines for COVID-19? (SA) – trusts about COVID-19 vaccine</b>                                                                    |                  |        |                  |        |
| Strongly distrust                                                                                                                                                                    | 2.19 (1.54–3.13) | <0.001 | 3.54 (2.36–5.29) | <0.001 |
| Distrust                                                                                                                                                                             | 1.44 (1.26–1.65) | <0.001 | 1.79 (1.48–2.16) | <0.001 |
| Neutral                                                                                                                                                                              | 1.00 (reference) | NA     | 1.00 (reference) | NA     |
| Trust                                                                                                                                                                                | 0.64 (0.58–0.70) | <0.001 | 0.77 (0.64–0.92) | 0.006  |
| Strongly trust                                                                                                                                                                       | 0.82 (0.56–1.19) | 0.291  | 0.74 (0.39–1.40) | 0.353  |
| <b>Do you trust your healthcare provider about vaccination against COVID-19? (SA) – trusts about COVID-19 vaccine</b>                                                                |                  |        |                  |        |
| Strongly distrust                                                                                                                                                                    | 0.80 (0.46–1.38) | 0.429  | 0.66 (0.37–1.18) | 0.164  |
| Distrust                                                                                                                                                                             | 0.86 (0.69–1.06) | 0.155  | 0.93 (0.72–1.20) | 0.588  |
| Neutral                                                                                                                                                                              | 1.00 (reference) | NA     | 1.00 (reference) | NA     |
| Trust                                                                                                                                                                                | 0.96 (0.87–1.06) | 0.421  | 0.66 (0.56–0.77) | <0.001 |
| Strongly trust                                                                                                                                                                       | 0.88 (0.70–1.11) | 0.281  | 0.74 (0.49–1.11) | 0.141  |
| <b>Do you think that healthcare workers and employees of elderly care facilities should be vaccinated? (SA) – belief about COVID-19 vaccine</b>                                      |                  |        |                  |        |
| Yes                                                                                                                                                                                  | 0.78 (0.62–0.99) | 0.037  | 0.17 (0.13–0.21) | <0.001 |
| No                                                                                                                                                                                   | 1.00 (reference) | NA     | 1.00 (reference) | NA     |
| Can't say either                                                                                                                                                                     | 2.67 (2.11–3.38) | <0.001 | 0.66 (0.51–0.84) | <0.001 |
| <b>Do you receive an influenza vaccine? (SA)</b>                                                                                                                                     |                  |        |                  |        |
| Every year                                                                                                                                                                           | 1.00 (reference) | NA     | 1.00 (reference) | NA     |
| Every few years                                                                                                                                                                      | 1.46 (1.33–1.61) | <0.001 | 1.83 (1.52–2.21) | <0.001 |
| Rarely or never                                                                                                                                                                      | 2.83 (2.61–3.07) | <0.001 | 5.73 (4.93–6.67) | <0.001 |
| <b>Information sources about COVID-19 (MA)</b>                                                                                                                                       |                  |        |                  |        |
| Physicians                                                                                                                                                                           | 0.82 (0.72–0.92) | 0.001  | 0.70 (0.56–0.87) | 0.001  |
| Nurses                                                                                                                                                                               | 0.79 (0.65–0.96) | 0.018  | 0.66 (0.48–0.91) | 0.010  |
| Pharmacists                                                                                                                                                                          | 0.81 (0.61–1.08) | 0.150  | 1.20 (0.79–1.83) | 0.400  |
| Dentists                                                                                                                                                                             | –                | –      | –                | –      |
| Newspapers                                                                                                                                                                           | 1.01 (0.93–1.09) | 0.870  | 0.87 (0.75–1.01) | 0.064  |
| Books                                                                                                                                                                                | 0.91 (0.72–1.16) | 0.453  | 0.75 (0.51–1.11) | 0.153  |
| Scientific literature                                                                                                                                                                | 0.94 (0.66–1.33) | –      | 1.43 (0.86–2.38) | 0.169  |
| Television                                                                                                                                                                           | 1.06 (0.96–1.18) | 0.244  | 0.81 (0.70–0.93) | 0.004  |
| Radio                                                                                                                                                                                | 0.96 (0.86–1.07) | 0.439  | 1.07 (0.89–1.30) | 0.472  |
| Internet news sites                                                                                                                                                                  | 1.21 (1.12–1.31) | <0.001 | 1.07 (0.94–1.21) | 0.290  |
| Search engines (Google, Yahoo, etc.)                                                                                                                                                 | 1.06 (0.97–1.16) | 0.216  | 1.03 (0.88–1.19) | 0.727  |
| LINE                                                                                                                                                                                 | 0.87 (0.75–1.01) | 0.060  | 0.80 (0.63–1.02) | 0.066  |
| Facebook                                                                                                                                                                             | 0.81 (0.61–1.08) | 0.148  | 0.79 (0.51–1.22) | 0.287  |
| Twitter                                                                                                                                                                              | 0.89 (0.77–1.03) | 0.128  | 0.95 (0.76–1.19) | 0.663  |
| Instagram                                                                                                                                                                            | 0.84 (0.61–1.16) | 0.283  | 0.97 (0.60–1.56) | 0.898  |
| YouTube                                                                                                                                                                              | 1.36 (1.14–1.61) | <0.001 | 1.09 (0.84–1.41) | 0.525  |
| Medical information sites                                                                                                                                                            | 0.64 (0.50–0.83) | <0.001 | 0.63 (0.42–0.95) | 0.026  |
| Blogs or web pages of celebrities and famous people                                                                                                                                  | 1.19 (0.90–1.56) | 0.225  | 1.33 (0.88–2.00) | 0.176  |
| Local governments such as prefectures and municipalities                                                                                                                             | 0.95 (0.87–1.05) | 0.328  | 0.86 (0.73–1.02) | 0.084  |
| Government                                                                                                                                                                           | 0.93 (0.83–1.05) | 0.233  | 0.92 (0.75–1.13) | 0.410  |
| Medical task-force advising the government, known as the Novel Coronavirus Expert Meeting (re-established as Novel Coronavirus Infectious Disease Control Subcommittee in July 2020) | 0.89 (0.77–1.04) | 0.151  | 0.75 (0.56–1.02) | 0.066  |
| Friends                                                                                                                                                                              | 1.13 (1.00–1.28) | 0.052  | 1.07 (0.86–1.33) | 0.538  |
| Family members                                                                                                                                                                       | 1.13 (1.02–1.26) | 0.021  | 1.11 (0.92–1.34) | 0.288  |

|                            |                  |       |                  |       |
|----------------------------|------------------|-------|------------------|-------|
| Scientists and researchers | 1.19 (0.93–1.52) | 0.168 | 1.80 (1.24–2.63) | 0.002 |
| Other companies            | 1.32 (1.04–1.67) | 0.021 | 1.30 (0.97–1.74) | 0.085 |

**Trust levels in information sources (MA)**

|                                                          |                  |       |                  |       |
|----------------------------------------------------------|------------------|-------|------------------|-------|
| Physicians                                               | 1.08 (0.98–1.18) | 0.103 | 0.99 (0.86–1.14) | 0.919 |
| Nurses                                                   | 1.02 (0.92–1.13) | 0.743 | 1.02 (0.86–1.19) | 0.854 |
| Pharmacists                                              | 1.03 (0.95–1.13) | 0.460 | 1.23 (1.06–1.42) | 0.005 |
| Veterinarians                                            | 0.95 (0.88–1.03) | 0.188 | 0.87 (0.77–0.98) | 0.026 |
| Dentists                                                 | 0.91 (0.84–0.99) | 0.028 | 0.90 (0.79–1.03) | 0.131 |
| Health fairs and events                                  | 1.04 (0.97–1.12) | 0.293 | 1.08 (0.96–1.21) | 0.218 |
| Newspapers                                               | –                | –     | –                | –     |
| Magazines                                                | 0.99 (0.90–1.08) | 0.832 | 1.09 (0.94–1.26) | 0.240 |
| Books                                                    | 1.03 (0.93–1.13) | 0.601 | 1.12 (0.96–1.30) | 0.140 |
| Scientific literature                                    | 0.95 (0.88–1.02) | 0.125 | 0.89 (0.80–1.00) | 0.059 |
| Television                                               | 1.11 (1.01–1.21) | 0.022 | 1.02 (0.90–1.16) | 0.755 |
| Radio                                                    | 0.93 (0.85–1.02) | 0.118 | 0.87 (0.75–1.00) | 0.048 |
| Internet news sites                                      | 1.06 (0.97–1.16) | 0.190 | 0.98 (0.84–1.13) | 0.733 |
| Search engines (Google, Yahoo, etc.)                     | 0.96 (0.88–1.05) | 0.379 | 1.13 (0.98–1.30) | 0.085 |
| LINE                                                     | 0.95 (0.87–1.04) | 0.247 | 0.85 (0.74–0.98) | 0.024 |
| Facebook                                                 | 0.93 (0.82–1.05) | 0.230 | 1.05 (0.87–1.26) | 0.640 |
| Twitter                                                  | 1.03 (0.91–1.17) | 0.648 | 1.02 (0.85–1.23) | 0.805 |
| Instagram                                                | 1.10 (0.95–1.26) | 0.195 | 1.00 (0.82–1.23) | 0.997 |
| YouTube                                                  | 1.03 (0.93–1.14) | 0.527 | 1.21 (1.04–1.41) | 0.015 |
| TikTok                                                   | 0.90 (0.81–1.00) | 0.046 | 0.85 (0.72–0.99) | 0.038 |
| Medical information sites                                | 0.97 (0.91–1.04) | 0.350 | 0.97 (0.87–1.08) | 0.575 |
| Blogs or web pages of celebrities and famous people      | 1.00 (0.92–1.08) | 0.926 | 0.92 (0.81–1.05) | 0.199 |
| Local governments such as prefectures and municipalities | 1.04 (0.96–1.12) | 0.359 | 0.95 (0.84–1.08) | 0.443 |
| Government                                               | 0.99 (0.92–1.07) | 0.802 | 1.06 (0.94–1.19) | 0.346 |
| Medical task-force advising the government               | 1.04 (0.96–1.12) | 0.322 | 1.04 (0.92–1.17) | 0.534 |
| Friends                                                  | 1.06 (0.97–1.15) | 0.183 | 1.19 (1.04–1.36) | 0.009 |
| Family members                                           | 1.02 (0.95–1.10) | 0.618 | 1.02 (0.91–1.15) | 0.727 |
| Scientists and researchers                               | 1.04 (0.96–1.13) | 0.320 | 0.98 (0.86–1.12) | 0.768 |
| Pharmaceutical companies                                 | 1.07 (0.98–1.16) | 0.142 | 0.96 (0.83–1.11) | 0.608 |
| Other companies                                          | 1.01 (0.93–1.10) | 0.865 | 1.11 (0.97–1.28) | 0.139 |

1 The estimates were derived from the multinomial logistic regression, in reference to the COVID-19 vaccine  
2 acceptance group. An en-dash indicates that the variable was not included in the model. Blank indicates no samples.  
3 SA: single-answer questions; MA: multiple-answer question. Highest education levels and annual household income  
4 in 2020 (ordinal scale questions) were also treated as continuous variables. Variables that are not on the tables were  
5 dropped in the process of optimal variable selection and were not statistically significant.

1 **Supplementary Table 6: Odds ratios (95% confidence intervals) for responding ‘not sure’ regarding intention to be vaccinated by Groups (A–D)**

|                                                                                                       | Group (A) elderly with<br>underlying diseases<br>N = 1986 | P value | Group (B) elderly without<br>underlying diseases<br>N = 6636 | P value | Group (C) younger adults<br>with underlying diseases<br>N = 1991 | P value | Group (D) younger adults<br>without underlying diseases<br>N = 19940 | P value |
|-------------------------------------------------------------------------------------------------------|-----------------------------------------------------------|---------|--------------------------------------------------------------|---------|------------------------------------------------------------------|---------|----------------------------------------------------------------------|---------|
| <b>COVID-19 pandemic situation</b>                                                                    |                                                           |         |                                                              |         |                                                                  |         |                                                                      |         |
| Total number of COVID-19 infected cases in residential prefectures as of February 16, 2021            | 1.00 (1.00–1.00)                                          | 0.598   | 1.00 (1.00–1.00)                                             | 0.471   | 1.00 (1.00–1.00)                                                 | 0.554   | 1.00 (1.00–1.00)                                                     | 0.966   |
| Number of COVID-19 infected cases in residential prefectures between 16 January and February 16, 2021 | –                                                         | –       | 1.00 (1.00–1.00)                                             | 0.600   | 1.00 (1.00–1.00)                                                 | 0.522   | 1.00 (1.00–1.00)                                                     | 0.668   |
| <b>Sociodemographic characteristics</b>                                                               |                                                           |         |                                                              |         |                                                                  |         |                                                                      |         |
| <b>Gender (SA)</b>                                                                                    |                                                           |         |                                                              |         |                                                                  |         |                                                                      |         |
| Women                                                                                                 | 1.27 (0.89–1.82)                                          | 0.190   | 1.86 (1.48–2.33)                                             | <0.001  | 1.29 (0.91–1.82)                                                 | 0.148   | 1.51 (1.37–1.66)                                                     | <0.001  |
| Men                                                                                                   | 1.00 (reference)                                          | NA      | 1.00 (reference)                                             | NA      | 1.00 (reference)                                                 | NA      | 1.00 (reference)                                                     | NA      |
| Other                                                                                                 | [Blank]                                                   | [Blank] | 43.42 (0.61–3066.43)                                         | 0.083   | 7.73 (0.43–140.42)                                               | 0.167   | 1.23 (0.44–3.42)                                                     | 0.695   |
| <b>Prefecture (SA)</b>                                                                                |                                                           |         |                                                              |         |                                                                  |         |                                                                      |         |
| Hokkaido                                                                                              | –                                                         | –       | –                                                            | –       | –                                                                | –       | 1.06 (0.88–1.27)                                                     | 0.566   |
| Aomori                                                                                                | –                                                         | –       | –                                                            | –       | –                                                                | –       | 0.92 (0.60–1.41)                                                     | 0.714   |
| Iwate                                                                                                 | –                                                         | –       | –                                                            | –       | –                                                                | –       | 0.97 (0.65–1.46)                                                     | 0.903   |
| Miyagi                                                                                                | –                                                         | –       | –                                                            | –       | –                                                                | –       | 0.90 (0.67–1.20)                                                     | 0.467   |
| Akita                                                                                                 | –                                                         | –       | –                                                            | –       | –                                                                | –       | 0.99 (0.63–1.56)                                                     | 0.974   |
| Yamagata                                                                                              | –                                                         | –       | –                                                            | –       | –                                                                | –       | 1.09 (0.68–1.75)                                                     | 0.716   |
| Fukushima                                                                                             | –                                                         | –       | –                                                            | –       | –                                                                | –       | 0.88 (0.61–1.27)                                                     | 0.495   |
| Ibaraki                                                                                               | –                                                         | –       | –                                                            | –       | –                                                                | –       | 1.11 (0.82–1.52)                                                     | 0.492   |
| Tochigi                                                                                               | –                                                         | –       | –                                                            | –       | –                                                                | –       | 1.21 (0.83–1.77)                                                     | 0.321   |
| Gunma                                                                                                 | –                                                         | –       | –                                                            | –       | –                                                                | –       | 0.68 (0.45–1.02)                                                     | 0.064   |
| Saitama                                                                                               | –                                                         | –       | –                                                            | –       | –                                                                | –       | 1.22 (1.04–1.43)                                                     | 0.016   |
| Chiba                                                                                                 | –                                                         | –       | –                                                            | –       | –                                                                | –       | 1.02 (0.88–1.19)                                                     | 0.780   |
| Tokyo                                                                                                 | –                                                         | –       | –                                                            | –       | –                                                                | –       | 1.00 (reference)                                                     | NA      |
| Kanagawa                                                                                              | –                                                         | –       | –                                                            | –       | –                                                                | –       | 1.14 (0.97–1.33)                                                     | 0.106   |
| Niigata                                                                                               | –                                                         | –       | –                                                            | –       | –                                                                | –       | 1.01 (0.77–1.32)                                                     | 0.956   |
| Toyama                                                                                                | –                                                         | –       | –                                                            | –       | –                                                                | –       | 0.79 (0.52–1.21)                                                     | 0.280   |
| Ishikawa                                                                                              | –                                                         | –       | –                                                            | –       | –                                                                | –       | 0.65 (0.43–1.00)                                                     | 0.051   |
| Fukui                                                                                                 | –                                                         | –       | –                                                            | –       | –                                                                | –       | 1.30 (0.75–2.27)                                                     | 0.353   |
| Yamanashi                                                                                             | –                                                         | –       | –                                                            | –       | –                                                                | –       | 0.74 (0.43–1.27)                                                     | 0.270   |
| Nagano                                                                                                | –                                                         | –       | –                                                            | –       | –                                                                | –       | 0.98 (0.72–1.33)                                                     | 0.892   |
| Gifu                                                                                                  | –                                                         | –       | –                                                            | –       | –                                                                | –       | 1.08 (0.76–1.54)                                                     | 0.653   |
| Shizuoka                                                                                              | –                                                         | –       | –                                                            | –       | –                                                                | –       | 1.06 (0.82–1.38)                                                     | 0.643   |

|                                                             |                  |       |                  |       |                   |       |                  |        |
|-------------------------------------------------------------|------------------|-------|------------------|-------|-------------------|-------|------------------|--------|
| Aichi                                                       | –                | –     | –                | –     | –                 | –     | 1.08 (0.92–1.27) | 0.360  |
| Mie                                                         | –                | –     | –                | –     | –                 | –     | 0.85 (0.61–1.18) | 0.323  |
| Shiga                                                       | –                | –     | –                | –     | –                 | –     | 0.84 (0.54–1.31) | 0.442  |
| Kyoto                                                       | –                | –     | –                | –     | –                 | –     | 1.03 (0.77–1.37) | 0.864  |
| Osaka                                                       | –                | –     | –                | –     | –                 | –     | 1.20 (1.03–1.41) | 0.021  |
| Hyogo                                                       | –                | –     | –                | –     | –                 | –     | 1.03 (0.85–1.25) | 0.777  |
| Nara                                                        | –                | –     | –                | –     | –                 | –     | 1.35 (0.90–2.03) | 0.143  |
| Wakayama                                                    | –                | –     | –                | –     | –                 | –     | 0.49 (0.27–0.89) | 0.020  |
| Tottori                                                     | –                | –     | –                | –     | –                 | –     | 1.19 (0.67–2.13) | 0.544  |
| Shimane                                                     | –                | –     | –                | –     | –                 | –     | 0.91 (0.53–1.57) | 0.731  |
| Okayama                                                     | –                | –     | –                | –     | –                 | –     | 1.19 (0.88–1.62) | 0.255  |
| Hiroshima                                                   | –                | –     | –                | –     | –                 | –     | 0.95 (0.73–1.24) | 0.730  |
| Yamaguchi                                                   | –                | –     | –                | –     | –                 | –     | 0.96 (0.63–1.45) | 0.838  |
| Tokushima                                                   | –                | –     | –                | –     | –                 | –     | 0.85 (0.50–1.43) | 0.535  |
| Kagawa                                                      | –                | –     | –                | –     | –                 | –     | 1.08 (0.69–1.68) | 0.734  |
| Ehime                                                       | –                | –     | –                | –     | –                 | –     | 0.91 (0.64–1.31) | 0.617  |
| Kochi                                                       | –                | –     | –                | –     | –                 | –     | 1.35 (0.68–2.68) | 0.384  |
| Fukuoka                                                     | –                | –     | –                | –     | –                 | –     | 1.10 (0.92–1.32) | 0.293  |
| Saga                                                        | –                | –     | –                | –     | –                 | –     | 1.22 (0.75–1.98) | 0.432  |
| Nagasaki                                                    | –                | –     | –                | –     | –                 | –     | 1.38 (0.93–2.04) | 0.112  |
| Kumamoto                                                    | –                | –     | –                | –     | –                 | –     | 0.84 (0.59–1.19) | 0.323  |
| Oita                                                        | –                | –     | –                | –     | –                 | –     | 0.86 (0.55–1.36) | 0.523  |
| Miyazaki                                                    | –                | –     | –                | –     | –                 | –     | 0.85 (0.51–1.43) | 0.543  |
| Kagoshima                                                   | –                | –     | –                | –     | –                 | –     | 0.54 (0.36–0.83) | 0.005  |
| Okinawa                                                     | –                | –     | –                | –     | –                 | –     | 1.18 (0.78–1.78) | 0.426  |
| Highest educational level (SA)                              | 0.89 (0.75–1.05) | 0.164 | 0.91 (0.83–1.00) | 0.040 | 0.93 (0.80–1.09)  | 0.385 | 1.00 (0.96–1.04) | 0.975  |
| Occupation type (SA)                                        |                  |       |                  |       |                   |       |                  |        |
| Agriculture, forestry and fisheries                         | –                | –     | 0.52 (0.15–1.78) | 0.301 | 2.78 (0.74–10.44) | 0.131 | 3.50 (1.99–6.17) | <0.001 |
| Construction                                                | –                | –     | 0.62 (0.25–1.54) | 0.303 | 1.42 (0.55–3.68)  | 0.466 | 1.63 (1.24–2.13) | <0.001 |
| Manufacturing                                               | –                | –     | 1.39 (0.62–3.10) | 0.422 | 0.90 (0.43–1.92)  | 0.794 | 1.93 (1.58–2.36) | <0.001 |
| Information and communications                              | –                | –     | 0.79 (0.23–2.77) | 0.717 | 1.49 (0.50–4.40)  | 0.473 | 2.02 (1.54–2.64) | <0.001 |
| Transportation and postal services                          | –                | –     | 0.98 (0.30–3.21) | 0.974 | 1.65 (0.64–4.27)  | 0.303 | 2.65 (2.01–3.49) | <0.001 |
| Wholesale and retail trade                                  | –                | –     | 0.75 (0.37–1.52) | 0.423 | 1.83 (0.82–4.04)  | 0.138 | 2.15 (1.74–2.67) | <0.001 |
| Finance and insurance                                       | –                | –     | 0.69 (0.17–2.86) | 0.611 | 1.02 (0.35–2.95)  | 0.974 | 2.41 (1.82–3.20) | <0.001 |
| Real estate and goods rental and leasing                    | –                | –     | 1.20 (0.51–2.80) | 0.674 | 3.03 (0.93–9.87)  | 0.065 | 1.86 (1.26–2.73) | 0.002  |
| Scientific research, professional and technical services    | –                | –     | 0.46 (0.14–1.52) | 0.203 | 4.65 (1.16–18.56) | 0.030 | 1.82 (1.27–2.61) | 0.001  |
| Accommodations, food and beverage services                  | –                | –     | 0.68 (0.26–1.78) | 0.431 | 1.30 (0.39–4.33)  | 0.664 | 1.88 (1.41–2.51) | <0.001 |
| Living-related and personal services and amusement services | –                | –     | 2.42 (0.91–6.43) | 0.076 | 1.66 (0.45–6.17)  | 0.447 | 2.02 (1.46–2.81) | <0.001 |



|                                                                                                                                        |                  |        |                  |        |                  |       |                  |        |
|----------------------------------------------------------------------------------------------------------------------------------------|------------------|--------|------------------|--------|------------------|-------|------------------|--------|
| Education and learning support                                                                                                         | –                | –      | 1.00 (0.44–2.27) | 0.995  | 1.98 (0.80–4.89) | 0.137 | 1.70 (1.31–2.20) | <0.001 |
| Healthcare and welfare                                                                                                                 | –                | –      | 1.00 (reference) | NA     | 1.00 (reference) | NA    | 1.00 (reference) | NA     |
| Combined services                                                                                                                      | –                | –      | 0.06 (0.01–0.38) | 0.003  | 1.01 (0.28–3.70) | 0.985 | 1.83 (1.13–2.96) | 0.013  |
| Services (not elsewhere classified)                                                                                                    | –                | –      | 0.59 (0.31–1.13) | 0.109  | 1.21 (0.57–2.56) | 0.627 | 1.86 (1.51–2.30) | <0.001 |
| Public service (not elsewhere classified)                                                                                              | –                | –      | 0.57 (0.21–1.58) | 0.279  | 1.30 (0.52–3.26) | 0.576 | 1.91 (1.46–2.50) | <0.001 |
| Students                                                                                                                               | –                | –      |                  |        | 0.34 (0.07–1.74) | 0.195 | 3.50 (2.63–4.65) | <0.001 |
| Homemaker                                                                                                                              | –                | –      | 0.75 (0.43–1.31) | 0.314  | 1.99 (1.01–3.91) | 0.046 | 1.99 (1.64–2.42) | <0.001 |
| Others                                                                                                                                 | –                | –      | 0.99 (0.57–1.74) | 0.976  | 1.59 (0.79–3.22) | 0.194 | 2.30 (1.86–2.86) | <0.001 |
| Annual household income in 2020 (SA)                                                                                                   | 1.02 (0.95–1.09) | 0.575  | 0.99 (0.96–1.03) | 0.589  | 0.98 (0.93–1.04) | 0.494 | 0.98 (0.97–1.00) | 0.020  |
| <b>Healthcare-related characteristics, including health literacy</b>                                                                   |                  |        |                  |        |                  |       |                  |        |
| Self-reported health status (SA)                                                                                                       |                  |        |                  |        |                  |       |                  |        |
| Very good                                                                                                                              | 0.85 (0.43–1.68) | 0.645  | 0.96 (0.76–1.22) | 0.749  | 0.99 (0.60–1.61) | 0.953 | 0.98 (0.87–1.10) | 0.727  |
| Good                                                                                                                                   | 1.26 (0.83–1.91) | 0.270  | 1.05 (0.86–1.29) | 0.639  | 0.90 (0.61–1.35) | 0.621 | 1.00 (0.90–1.12) | 0.975  |
| Fair                                                                                                                                   | 1.00 (reference) | NA     | 1.00 (reference) | NA     | 1.00 (reference) | NA    | 1.00 (reference) | NA     |
| Poor                                                                                                                                   | 2.29 (1.51–3.46) | <0.001 | 1.70 (1.25–2.31) | <0.001 | 1.16 (0.79–1.72) | 0.446 | 0.98 (0.83–1.15) | 0.786  |
| Very poor                                                                                                                              | 1.63 (0.83–3.20) | 0.153  | 1.44 (0.64–3.25) | 0.380  | 1.00 (0.53–1.87) | 0.991 | 1.33 (0.94–1.88) | 0.106  |
| Have you ever received a COVID-19 test? (SA)                                                                                           |                  |        |                  |        |                  |       |                  |        |
| No                                                                                                                                     | –                | –      | –                | –      | 0.82 (0.21–3.28) | 0.783 | 1.90 (1.04–3.48) | 0.037  |
| Yes – PCR test                                                                                                                         | –                | –      | –                | –      | 0.67 (0.18–2.54) | 0.555 | 1.52 (0.85–2.74) | 0.160  |
| Yes – antigen test                                                                                                                     | –                | –      | –                | –      | 0.52 (0.14–1.87) | 0.316 | 1.08 (0.63–1.86) | 0.773  |
| Yes – antibody testing                                                                                                                 | –                | –      | –                | –      | 0.55 (0.15–2.12) | 0.388 | 1.20 (0.66–2.19) | 0.554  |
| Yes – unsure about either of the three                                                                                                 | –                | –      | –                | –      | 0.28 (0.05–1.54) | 0.143 | 2.12 (1.06–4.24) | 0.033  |
| Preventive measures against COVID-19 (MA)                                                                                              |                  |        |                  |        |                  |       |                  |        |
| Avoid going to places with poor ventilation                                                                                            | 0.83 (0.57–1.21) | 0.345  | 1.02 (0.84–1.25) | 0.824  | 1.16 (0.83–1.61) | 0.386 | 0.87 (0.79–0.96) | 0.004  |
| Avoid going to places where there are many people gathered                                                                             | 0.87 (0.53–1.45) | 0.596  | 0.96 (0.74–1.25) | 0.753  | 0.95 (0.63–1.42) | 0.792 | 1.13 (1.01–1.27) | 0.028  |
| Avoid talking or speaking in close proximity to other people                                                                           | 0.94 (0.64–1.38) | 0.739  | 1.05 (0.86–1.29) | 0.619  | 1.10 (0.78–1.54) | 0.601 | 0.91 (0.82–1.00) | 0.062  |
| Washing hands, gargling, and hand disinfection with alcohol.                                                                           | 1.43 (0.79–2.60) | 0.243  | 0.93 (0.69–1.25) | 0.632  | 1.05 (0.66–1.68) | 0.827 | 1.07 (0.94–1.21) | 0.297  |
| Etiquette (masks, handkerchiefs, etc.) in case of coughing or sneezing                                                                 | 1.23 (0.79–1.90) | 0.357  | 1.11 (0.89–1.38) | 0.364  | 1.00 (0.68–1.48) | 0.990 | 1.06 (0.96–1.18) | 0.239  |
| Telework                                                                                                                               | 1.43 (0.58–3.51) | 0.437  | 0.91 (0.51–1.64) | 0.763  | 0.77 (0.44–1.34) | 0.353 | 0.97 (0.84–1.13) | 0.733  |
| Be conscious of social distancing                                                                                                      | 0.85 (0.59–1.23) | 0.393  | 0.98 (0.81–1.18) | 0.807  | 0.97 (0.68–1.36) | 0.842 | 1.02 (0.92–1.12) | 0.714  |
| Avoid going out unnecessarily.                                                                                                         | 1.27 (0.83–1.96) | 0.270  | 1.02 (0.82–1.26) | 0.886  | 0.96 (0.67–1.37) | 0.818 | 1.06 (0.97–1.17) | 0.211  |
| Other preventive measures                                                                                                              | 0.80 (0.34–1.89) | 0.607  | 0.95 (0.58–1.54) | 0.824  | 1.29 (0.63–2.66) | 0.485 | 1.07 (0.82–1.39) | 0.627  |
| No preventive measures                                                                                                                 | 0.58 (0.15–2.24) | 0.430  | 0.75 (0.41–1.37) | 0.348  | 0.79 (0.30–2.09) | 0.639 | 0.95 (0.75–1.21) | 0.686  |
| Have you ever refrained from visiting a medical institution because you were anxious about being infected by the new coronavirus? (MA) |                  |        |                  |        |                  |       |                  |        |
| Have refrained from regular hospital visits                                                                                            | –                | –      | 1.14 (0.83–1.57) | 0.407  | 0.74 (0.45–1.23) | 0.253 | 0.96 (0.80–1.16) | 0.672  |

|                                                                                                                                 |                   |        |                   |        |                  |        |                  |        |
|---------------------------------------------------------------------------------------------------------------------------------|-------------------|--------|-------------------|--------|------------------|--------|------------------|--------|
| Have refrained from visiting the hospital for sudden symptoms such as a cold, headache, or stomachache                          | –                 | –      | 0.96 (0.65–1.42)  | 0.833  | 0.95 (0.57–1.57) | 0.835  | 1.18 (0.98–1.42) | 0.075  |
| Have refrained from medical checkups, physical examinations, or cancer screenings                                               | –                 | –      | 1.28 (0.93–1.75)  | 0.132  | 0.97 (0.58–1.62) | 0.904  | 0.97 (0.81–1.17) | 0.786  |
| Have refrained from other medical examinations                                                                                  | –                 | –      | 1.25 (0.89–1.75)  | 0.193  | 1.79 (1.01–3.17) | 0.045  | 1.00 (0.82–1.23) | 0.978  |
| No                                                                                                                              | –                 | –      | 1.24 (0.88–1.75)  | 0.214  | 1.72 (1.00–2.95) | 0.049  | 1.22 (1.00–1.47) | 0.047  |
| <b>How confident are you filling out medical forms by yourself? (health literacy) (SA)</b>                                      |                   |        |                   |        |                  |        |                  |        |
| Not at all                                                                                                                      | –                 | –      | 0.88 (0.21–3.72)  | 0.860  | 0.77 (0.33–1.79) | 0.544  | 1.38 (0.95–2.00) | 0.091  |
| A little bit                                                                                                                    | –                 | –      | 0.79 (0.43–1.47)  | 0.457  | 0.60 (0.35–1.04) | 0.067  | 1.14 (0.93–1.39) | 0.219  |
| Somewhat                                                                                                                        | –                 | –      | 1.00 (reference)  | NA     | 1.00 (reference) | NA     | 1.00 (reference) | NA     |
| Extremely                                                                                                                       | –                 | –      | 1.08 (0.86–1.37)  | 0.498  | 0.70 (0.49–1.00) | 0.052  | 1.06 (0.96–1.18) | 0.261  |
| Quite a bit                                                                                                                     | –                 | –      | 1.33 (1.01–1.74)  | 0.039  | 0.60 (0.38–0.95) | 0.030  | 1.09 (0.96–1.24) | 0.198  |
| <b>Psychological characteristics</b>                                                                                            |                   |        |                   |        |                  |        |                  |        |
| <b>How anxious are you about COVID-19? (SA) – perceived risks of COVID-19</b>                                                   |                   |        |                   |        |                  |        |                  |        |
| Not at all anxious                                                                                                              | 0.43 (0.14–1.28)  | 0.128  | 0.80 (0.46–1.40)  | 0.435  | 0.48 (0.21–1.13) | 0.093  | 0.95 (0.75–1.20) | 0.654  |
| Vaguely anxious                                                                                                                 | 0.88 (0.44–1.75)  | 0.716  | 0.63 (0.42–0.95)  | 0.027  | 0.91 (0.54–1.51) | 0.707  | 1.08 (0.90–1.30) | 0.409  |
| Have a clear sense of anxiety                                                                                                   | 0.83 (0.42–1.66)  | 0.606  | 0.50 (0.33–0.75)  | 0.001  | 1.31 (0.77–2.21) | 0.318  | 0.84 (0.70–1.02) | 0.077  |
| Feel fear and have anxiety                                                                                                      | 1.00 (reference)  | NA     | 1.00 (reference)  | NA     | 1.00 (reference) | NA     | 1.00 (reference) | NA     |
| <b>What is your best guess as to whether you will get COVID-19 within the next 6 months? (SA) – perceived risks of COVID-19</b> |                   |        |                   |        |                  |        |                  |        |
| I don't think I will get COVID-19                                                                                               | –                 | –      | 1.49 (1.13–1.96)  | 0.005  | 1.78 (1.24–2.55) | 0.002  | 1.13 (0.97–1.31) | 0.111  |
| I think I will get a mild case of COVID-19                                                                                      | –                 | –      | 1.25 (0.92–1.71)  | 0.155  | 1.07 (0.70–1.63) | 0.743  | 0.95 (0.82–1.11) | 0.526  |
| I think I will get seriously ill from COVID-19                                                                                  | –                 | –      | 1.00 (reference)  | NA     | 1.00 (reference) | NA     | 1.00 (reference) | NA     |
| I have already had COVID-19                                                                                                     | –                 | –      | 6.82 (1.48–31.35) | 0.014  | 1.85 (0.41–8.43) | 0.424  | 4.56 (2.82–7.38) | <0.001 |
| <b>How do you think the disadvantages of the COVID-19 vaccine are? (SA) – perceived risks of a COVID-19 vaccine</b>             |                   |        |                   |        |                  |        |                  |        |
| Very small                                                                                                                      | 0.32 (0.14–0.76)  | 0.010  | 0.19 (0.12–0.31)  | <0.001 | 0.14 (0.06–0.34) | <0.001 | 0.27 (0.21–0.34) | <0.001 |
| Small                                                                                                                           | 0.53 (0.36–0.76)  | <0.001 | 0.45 (0.37–0.54)  | <0.001 | 0.37 (0.26–0.52) | <0.001 | 0.45 (0.41–0.50) | <0.001 |
| Medium                                                                                                                          | 1.00 (reference)  | NA     | 1.00 (reference)  | NA     | 1.00 (reference) | NA     | 1.00 (reference) | NA     |
| Large                                                                                                                           | 1.98 (1.18–3.33)  | 0.010  | 0.91 (0.68–1.21)  | 0.512  | 1.68 (1.07–2.63) | 0.024  | 1.23 (1.07–1.40) | 0.003  |
| Very large                                                                                                                      | 3.09 (0.70–13.65) | 0.136  | 2.46 (0.99–6.08)  | 0.051  | 2.38 (0.93–6.10) | 0.072  | 2.41 (1.62–3.57) | <0.001 |
| <b>Do you think getting a COVID-19 vaccine will ease your anxiety? (SA) – perceived benefits of a COVID-19 vaccine</b>          |                   |        |                   |        |                  |        |                  |        |
| Strongly disagree                                                                                                               | 3.70 (0.86–15.87) | 0.078  | 2.56 (1.02–6.42)  | 0.044  | 2.77 (1.07–7.15) | 0.036  | 1.45 (1.05–1.99) | 0.023  |
| Disagree                                                                                                                        | 1.07 (0.65–1.74)  | 0.800  | 1.22 (0.96–1.55)  | 0.099  | 1.14 (0.74–1.73) | 0.557  | 1.30 (1.15–1.48) | <0.001 |
| Neither agree nor disagree                                                                                                      | 1.00 (reference)  | NA     | 1.00 (reference)  | NA     | 1.00 (reference) | NA     | 1.00 (reference) | NA     |

|                                                                                                                                                 |                   |        |                   |        |                   |        |                  |        |
|-------------------------------------------------------------------------------------------------------------------------------------------------|-------------------|--------|-------------------|--------|-------------------|--------|------------------|--------|
| Agree                                                                                                                                           | 0.48 (0.33–0.69)  | <0.001 | 0.51 (0.42–0.62)  | <0.001 | 0.90 (0.63–1.29)  | 0.562  | 0.58 (0.52–0.64) | <0.001 |
| Strongly agree                                                                                                                                  | 0.39 (0.09–1.70)  | 0.211  | 0.86 (0.39–1.92)  | 0.718  | 1.48 (0.44–4.95)  | 0.526  | 0.71 (0.49–1.03) | 0.069  |
| If others have been vaccinated against COVID-19, do you think you should be vaccinated as well? (SA) – perceived norms about a COVID-19 vaccine |                   |        |                   |        |                   |        |                  |        |
| Strongly disagree                                                                                                                               | 0.05 (0.01–0.41)  | 0.005  | 0.45 (0.16–1.26)  | 0.129  | 0.43 (0.16–1.17)  | 0.100  | 0.47 (0.32–0.69) | <0.001 |
| Disagree                                                                                                                                        | 0.77 (0.44–1.33)  | 0.344  | 0.81 (0.61–1.09)  | 0.164  | 0.71 (0.42–1.20)  | 0.196  | 0.78 (0.66–0.91) | 0.002  |
| Neither agree nor disagree                                                                                                                      | 1.00 (reference)  | NA     | 1.00 (reference)  | NA     | 1.00 (reference)  | NA     | 1.00 (reference) | NA     |
| Agree                                                                                                                                           | 0.17 (0.12–0.25)  | <0.001 | 0.20 (0.16–0.24)  | <0.001 | 0.25 (0.18–0.36)  | <0.001 | 0.29 (0.26–0.32) | <0.001 |
| Strongly agree                                                                                                                                  | 0.04 (0.01–0.11)  | <0.001 | 0.02 (0.01–0.04)  | <0.001 | 0.03 (0.01–0.09)  | <0.001 | 0.03 (0.02–0.04) | <0.001 |
| Do you trust scientists in the field of vaccine development for COVID-19? (SA) – trusts about COVID-19 vaccine                                  |                   |        |                   |        |                   |        |                  |        |
| Strongly distrust                                                                                                                               | 6.15 (0.57–66.11) | 0.134  | 2.92 (0.34–24.78) | 0.326  | 0.72 (0.16–3.22)  | 0.671  | 0.63 (0.34–1.15) | 0.132  |
| Distrust                                                                                                                                        | 1.46 (0.65–3.27)  | 0.363  | 1.31 (0.82–2.11)  | 0.260  | 0.54 (0.28–1.07)  | 0.076  | 0.85 (0.67–1.07) | 0.157  |
| Neutral                                                                                                                                         | 1.00 (reference)  | NA     | 1.00 (reference)  | NA     | 1.00 (reference)  | NA     | 1.00 (reference) | NA     |
| Trust                                                                                                                                           | 0.65 (0.44–0.97)  | 0.033  | 0.65 (0.53–0.82)  | <0.001 | 0.70 (0.47–1.04)  | 0.079  | 0.71 (0.63–0.80) | <0.001 |
| Strongly trust                                                                                                                                  | 0.28 (0.05–1.61)  | 0.155  | 0.89 (0.35–2.25)  | 0.801  | 0.62 (0.17–2.33)  | 0.483  | 0.73 (0.49–1.09) | 0.121  |
| Do you trust the public authorities to approve vaccines for COVID-19? (SA) – trusts about COVID-19 vaccine                                      |                   |        |                   |        |                   |        |                  |        |
| Strongly distrust                                                                                                                               | 0.52 (0.13–2.05)  | 0.351  | 6.84 (2.07–22.55) | 0.002  | 2.79 (0.94–8.27)  | 0.064  | 1.96 (1.26–3.05) | 0.003  |
| Distrust                                                                                                                                        | 0.87 (0.47–1.61)  | 0.667  | 1.39 (1.00–1.93)  | 0.048  | 1.33 (0.79–2.24)  | 0.277  | 1.53 (1.29–1.82) | <0.001 |
| Neutral                                                                                                                                         | 1.00 (reference)  | NA     | 1.00 (reference)  | NA     | 1.00 (reference)  | NA     | 1.00 (reference) | NA     |
| Trust                                                                                                                                           | 0.67 (0.44–1.00)  | 0.051  | 0.56 (0.45–0.70)  | <0.001 | 0.67 (0.45–1.00)  | 0.049  | 0.64 (0.57–0.72) | <0.001 |
| Strongly trust                                                                                                                                  | 0.42 (0.03–5.07)  | 0.494  | 0.70 (0.21–2.36)  | 0.562  | 3.22 (0.86–12.10) | 0.083  | 0.75 (0.48–1.16) | 0.199  |
| Do you trust your healthcare provider about vaccination against COVID-19? (SA) – trusts about COVID-19 vaccine                                  |                   |        |                   |        |                   |        |                  |        |
| Strongly distrust                                                                                                                               | –                 | –      | 0.12 (0.02–1.02)  | 0.053  | 0.38 (0.08–1.74)  | 0.213  | 1.55 (0.74–3.23) | 0.241  |
| Distrust                                                                                                                                        | –                 | –      | 0.97 (0.55–1.70)  | 0.913  | 0.84 (0.41–1.70)  | 0.621  | 0.89 (0.68–1.15) | 0.364  |
| Neutral                                                                                                                                         | –                 | –      | 1.00 (reference)  | NA     | 1.00 (reference)  | NA     | 1.00 (reference) | NA     |
| Trust                                                                                                                                           | –                 | –      | 0.81 (0.64–1.03)  | 0.081  | 0.82 (0.55–1.22)  | 0.330  | 1.01 (0.90–1.14) | 0.874  |
| Strongly trust                                                                                                                                  | –                 | –      | 0.38 (0.18–0.80)  | 0.010  | 0.58 (0.24–1.42)  | 0.231  | 1.08 (0.83–1.40) | 0.567  |
| Do you think that healthcare workers and employees of elderly care facilities should be vaccinated? (SA) – belief about COVID-19 vaccine        |                   |        |                   |        |                   |        |                  |        |
| Yes                                                                                                                                             | 1.19 (0.21–6.69)  | 0.842  | 1.69 (0.71–4.03)  | 0.236  | 1.07 (0.48–2.38)  | 0.868  | 0.65 (0.50–0.84) | 0.001  |
| No                                                                                                                                              | 1.00 (reference)  | NA     | 1.00 (reference)  | NA     | 1.00 (reference)  | NA     | 1.00 (reference) | NA     |
| Can't say either                                                                                                                                | 9.17 (1.54–54.54) | 0.015  | 7.80 (3.20–19.00) | <0.001 | 4.45 (1.93–10.27) | <0.001 | 2.05 (1.57–2.69) | <0.001 |
| Do you receive an influenza vaccine? (SA)                                                                                                       |                   |        |                   |        |                   |        |                  |        |
| Every year                                                                                                                                      | 1.00 (reference)  | NA     | 1.00 (reference)  | NA     | 1.00 (reference)  | NA     | 1.00 (reference) | NA     |

|                 |                  |        |                  |        |                  |        |                  |        |
|-----------------|------------------|--------|------------------|--------|------------------|--------|------------------|--------|
| Every few years | 1.59 (1.03–2.45) | 0.036  | 1.55 (1.24–1.95) | <0.001 | 1.41 (0.94–2.12) | 0.093  | 1.49 (1.32–1.67) | <0.001 |
| Rarely or never | 3.49 (2.41–5.05) | <0.001 | 3.46 (2.85–4.19) | <0.001 | 2.67 (1.90–3.75) | <0.001 | 2.66 (2.41–2.93) | <0.001 |

**Information sources about COVID-19 (MA)**

|                                                                                                                                                                                      |                  |       |                  |       |                  |       |                  |        |
|--------------------------------------------------------------------------------------------------------------------------------------------------------------------------------------|------------------|-------|------------------|-------|------------------|-------|------------------|--------|
| Physicians                                                                                                                                                                           | 1.09 (0.75–1.60) | 0.651 | 0.89 (0.67–1.18) | 0.410 | 0.55 (0.37–0.83) | 0.004 | 0.75 (0.63–0.88) | <0.001 |
| Nurses                                                                                                                                                                               | –                | –     | –                | –     | 0.79 (0.45–1.40) | 0.417 | 0.86 (0.67–1.11) | 0.243  |
| Pharmacists                                                                                                                                                                          | –                | –     | 0.64 (0.32–1.30) | 0.219 | –                | –     | 0.91 (0.61–1.34) | 0.619  |
| Dentists                                                                                                                                                                             | –                | –     | 0.46 (0.21–1.01) | 0.053 | –                | –     | –                | –      |
| Newspapers                                                                                                                                                                           | –                | –     | 0.95 (0.80–1.14) | 0.606 | 1.02 (0.73–1.42) | 0.907 | 0.98 (0.88–1.08) | 0.678  |
| Books                                                                                                                                                                                | –                | –     | –                | –     | –                | –     | 0.79 (0.59–1.04) | 0.096  |
| Scientific literature                                                                                                                                                                | –                | –     | –                | –     | 0.06 (0.01–0.33) | 0.001 | –                | –      |
| Television                                                                                                                                                                           | –                | –     | 0.80 (0.59–1.08) | 0.139 | 0.99 (0.66–1.50) | 0.970 | 1.02 (0.91–1.15) | 0.743  |
| Radio                                                                                                                                                                                | –                | –     | 0.98 (0.79–1.22) | 0.857 | 0.92 (0.58–1.46) | 0.739 | 0.94 (0.81–1.08) | 0.377  |
| Internet news sites                                                                                                                                                                  | 1.26 (0.88–1.79) | 0.206 | 1.13 (0.94–1.36) | 0.191 | 1.10 (0.80–1.53) | 0.545 | 1.19 (1.09–1.31) | <0.001 |
| Search engines (Google, Yahoo, etc.)                                                                                                                                                 | 1.52 (0.98–2.35) | 0.062 | 0.94 (0.74–1.20) | 0.641 | 1.31 (0.90–1.90) | 0.153 | 1.08 (0.97–1.20) | 0.161  |
| LINE                                                                                                                                                                                 | –                | –     | 0.71 (0.47–1.07) | 0.102 | –                | –     | 0.91 (0.77–1.08) | 0.281  |
| Facebook                                                                                                                                                                             | –                | –     | 0.64 (0.29–1.38) | 0.251 | –                | –     | 0.70 (0.50–0.97) | 0.032  |
| Twitter                                                                                                                                                                              | –                | –     | –                | –     | 0.84 (0.48–1.46) | 0.534 | 0.95 (0.81–1.11) | 0.510  |
| Instagram                                                                                                                                                                            | –                | –     | –                | –     | –                | –     | –                | –      |
| YouTube                                                                                                                                                                              | –                | –     | 1.46 (0.93–2.30) | 0.099 | –                | –     | 1.34 (1.10–1.64) | 0.005  |
| Medical information sites                                                                                                                                                            | –                | –     | –                | –     | –                | –     | 0.52 (0.38–0.71) | <0.001 |
| Blogs or web pages of celebrities and famous people                                                                                                                                  | –                | –     | –                | –     | –                | –     | 1.34 (0.97–1.86) | 0.080  |
| Local governments such as prefectures and municipalities                                                                                                                             | 0.85 (0.60–1.22) | 0.387 | 1.07 (0.89–1.29) | 0.461 | 1.12 (0.76–1.64) | 0.569 | 0.90 (0.79–1.01) | 0.081  |
| Government                                                                                                                                                                           | –                | –     | –                | –     | 0.71 (0.45–1.11) | 0.130 | 0.96 (0.83–1.11) | 0.591  |
| Medical task-force advising the government, known as the Novel Coronavirus Expert Meeting (re-established as Novel Coronavirus Infectious Disease Control Subcommittee in July 2020) | –                | –     | 0.83 (0.62–1.12) | 0.229 | –                | –     | 0.88 (0.73–1.08) | 0.225  |
| Friends                                                                                                                                                                              | –                | –     | 1.31 (1.02–1.67) | 0.034 | 1.63 (0.95–2.80) | 0.075 | 1.04 (0.88–1.22) | 0.655  |
| Family members                                                                                                                                                                       | –                | –     | 1.05 (0.84–1.31) | 0.664 | 1.33 (0.84–2.10) | 0.225 | 1.20 (1.04–1.38) | 0.010  |
| Scientists and researchers                                                                                                                                                           | –                | –     | –                | –     | 3.22 (1.17–8.86) | 0.024 | –                | –      |
| Other companies                                                                                                                                                                      | –                | –     | –                | –     | 2.12 (0.87–5.15) | 0.099 | 1.29 (0.99–1.68) | 0.056  |

**Trust levels in information sources (MA)**

|                         |                  |       |                  |       |                  |       |                  |       |
|-------------------------|------------------|-------|------------------|-------|------------------|-------|------------------|-------|
| Physicians              | –                | –     | 1.06 (0.84–1.33) | 0.618 | 1.18 (0.85–1.64) | 0.326 | 1.08 (0.97–1.21) | 0.150 |
| Nurses                  | 1.70 (1.14–2.53) | 0.009 | 1.06 (0.81–1.38) | 0.680 | 1.09 (0.74–1.62) | 0.662 | 0.96 (0.85–1.09) | 0.528 |
| Pharmacists             | 0.65 (0.43–0.99) | 0.043 | 1.18 (0.95–1.47) | 0.140 | 1.05 (0.74–1.50) | 0.770 | 1.02 (0.92–1.14) | 0.668 |
| Veterinarians           | 0.92 (0.70–1.22) | 0.580 | 0.81 (0.68–0.97) | 0.022 | 1.41 (1.05–1.90) | 0.023 | 0.97 (0.88–1.07) | 0.522 |
| Dentists                | –                | –     | 0.93 (0.77–1.13) | 0.485 | 0.84 (0.61–1.16) | 0.295 | 0.89 (0.81–0.99) | 0.026 |
| Health fairs and events | 1.07 (0.79–1.45) | 0.668 | 0.87 (0.73–1.04) | 0.129 | –                | –     | 1.09 (0.99–1.19) | 0.069 |
| Newspapers              | –                | –     | 1.10 (0.91–1.33) | 0.309 | 0.87 (0.64–1.17) | 0.343 | 0.97 (0.88–1.07) | 0.588 |

|                                                          |                  |       |                  |       |                  |       |                  |       |
|----------------------------------------------------------|------------------|-------|------------------|-------|------------------|-------|------------------|-------|
| Magazines                                                | –                | –     | –                | –     | 0.89 (0.61–1.31) | 0.563 | 1.02 (0.91–1.14) | 0.723 |
| Books                                                    | –                | –     | 1.00 (0.82–1.20) | 0.959 | 1.42 (0.96–2.10) | 0.076 | 0.99 (0.88–1.11) | 0.891 |
| Scientific literature                                    | 0.81 (0.60–1.09) | 0.162 | 0.96 (0.81–1.14) | 0.642 | 0.94 (0.70–1.25) | 0.659 | 0.96 (0.88–1.05) | 0.408 |
| Television                                               | 1.11 (0.80–1.55) | 0.514 | 0.94 (0.73–1.20) | 0.607 | –                | –     | 1.16 (1.04–1.29) | 0.006 |
| Radio                                                    | –                | –     | 1.05 (0.82–1.34) | 0.723 | 0.94 (0.68–1.31) | 0.712 | 0.90 (0.81–1.01) | 0.064 |
| Internet news sites                                      | 0.78 (0.53–1.14) | 0.204 | 1.21 (0.97–1.49) | 0.088 | 1.41 (0.97–2.05) | 0.075 | 1.02 (0.92–1.14) | 0.691 |
| Search engines (Google, Yahoo, etc.)                     | 0.96 (0.66–1.40) | 0.833 | 0.88 (0.71–1.09) | 0.239 | 0.86 (0.59–1.24) | 0.405 | 0.99 (0.89–1.10) | 0.831 |
| LINE                                                     | 0.89 (0.58–1.35) | 0.578 | 0.90 (0.72–1.12) | 0.357 | 0.85 (0.63–1.16) | 0.316 | 0.99 (0.89–1.10) | 0.858 |
| Facebook                                                 | 0.55 (0.33–0.93) | 0.027 | 1.12 (0.78–1.62) | 0.528 | –                | –     | 0.92 (0.80–1.06) | 0.229 |
| Twitter                                                  | –                | –     | –                | –     | –                | –     | 1.04 (0.90–1.20) | 0.589 |
| Instagram                                                | –                | –     | 1.18 (0.80–1.74) | 0.402 | –                | –     | 1.07 (0.91–1.26) | 0.394 |
| YouTube                                                  | 1.58 (1.00–2.51) | 0.051 | 0.95 (0.72–1.25) | 0.710 | 0.82 (0.60–1.11) | 0.194 | 1.07 (0.95–1.20) | 0.282 |
| TikTok                                                   | –                | –     | –                | –     | –                | –     | 0.87 (0.78–0.99) | 0.028 |
| Medical information sites                                | 0.96 (0.70–1.30) | 0.776 | 1.00 (0.86–1.18) | 0.968 | 0.89 (0.67–1.17) | 0.390 | 0.95 (0.88–1.03) | 0.259 |
| Blogs or web pages of celebrities and famous people      | 1.10 (0.76–1.57) | 0.618 | 0.96 (0.79–1.17) | 0.702 | 1.01 (0.74–1.39) | 0.928 | 1.01 (0.92–1.11) | 0.896 |
| Local governments such as prefectures and municipalities | 1.03 (0.72–1.48) | 0.854 | –                | –     | 0.83 (0.60–1.16) | 0.276 | 1.09 (0.99–1.21) | 0.068 |
| Government                                               | 0.85 (0.61–1.18) | 0.321 | 0.96 (0.81–1.13) | 0.601 | 0.88 (0.66–1.18) | 0.396 | 1.01 (0.93–1.10) | 0.812 |
| Medical task-force advising the government               | 1.17 (0.85–1.61) | 0.328 | 1.14 (0.96–1.36) | 0.130 | 1.25 (0.94–1.67) | 0.127 | 0.98 (0.89–1.07) | 0.602 |
| Friends                                                  | 1.42 (0.98–2.08) | 0.067 | 1.03 (0.85–1.25) | 0.794 | 1.43 (1.03–1.99) | 0.032 | 1.05 (0.95–1.16) | 0.353 |
| Family members                                           | 0.72 (0.52–0.99) | 0.043 | 1.10 (0.93–1.29) | 0.275 | 1.02 (0.76–1.38) | 0.888 | 1.01 (0.92–1.11) | 0.843 |
| Scientists and researchers                               | –                | –     | –                | –     | 0.78 (0.56–1.10) | 0.155 | 1.11 (1.00–1.22) | 0.043 |
| Pharmaceutical companies                                 | 1.09 (0.77–1.56) | 0.619 | 1.20 (0.99–1.46) | 0.063 | 0.96 (0.68–1.34) | 0.796 | 1.03 (0.93–1.15) | 0.571 |
| Other companies                                          | 1.43 (0.98–2.08) | 0.065 | 1.09 (0.89–1.33) | 0.402 | –                | –     | 0.95 (0.86–1.06) | 0.375 |

1 The estimates were derived from the multinomial logistic regression, in reference to the COVID-19 vaccine acceptance group. An en-dash indicates that the variable was not  
2 included in the model. Blank indicates no samples. SA: single-answer questions; MA: multiple-answer question. Highest education levels and annual household income in  
3 2020 (ordinal scale questions) were also treated as continuous variables. Variables that are not on the tables were dropped in the process of optimal variable selection and  
4 were not statistically significant.

1 **Supplementary Table 7: Odds ratios (95% confidence intervals) for responding 'no' regarding intention to be vaccinated by Groups (A–D)**

|                                                                                                       | Group (A) elderly with<br>underlying diseases<br>N = 1986 | P value | Group (B) elderly without<br>underlying diseases<br>N = 6636 | P value | Group (C) younger adults<br>with underlying diseases<br>N = 1991 | P value | Group (D) younger adults<br>without underlying diseases<br>N = 19940 | P value |
|-------------------------------------------------------------------------------------------------------|-----------------------------------------------------------|---------|--------------------------------------------------------------|---------|------------------------------------------------------------------|---------|----------------------------------------------------------------------|---------|
| <b>COVID-19 pandemic situation</b>                                                                    |                                                           |         |                                                              |         |                                                                  |         |                                                                      |         |
| Total number of COVID-19 infected cases in residential prefectures as of February 16, 2021            | 1.00 (1.00–1.00)                                          | 0.700   | 1.00 (1.00–1.00)                                             | 0.301   | 1.00 (1.00–1.00)                                                 | 0.595   | 1.00 (1.00–1.00)                                                     | 0.601   |
| Number of COVID-19 infected cases in residential prefectures between 16 January and February 16, 2021 | –                                                         | –       | 1.00 (1.00–1.00)                                             | 0.389   | 1.00 (1.00–1.00)                                                 | 0.602   | 1.00 (1.00–1.00)                                                     | 0.518   |
| <b>Sociodemographic characteristics</b>                                                               |                                                           |         |                                                              |         |                                                                  |         |                                                                      |         |
| <b>Gender (SA)</b>                                                                                    |                                                           |         |                                                              |         |                                                                  |         |                                                                      |         |
| Women                                                                                                 | 1.94 (0.81–4.68)                                          | 0.139   | 2.10 (1.33–3.30)                                             | 0.001   | 1.76 (1.04–2.98)                                                 | 0.035   | 1.59 (1.37–1.84)                                                     | <0.001  |
| Men                                                                                                   | 1.00 (reference)                                          | NA      | 1.00 (reference)                                             | NA      | 1.00 (reference)                                                 | NA      | 1.00 (reference)                                                     | NA      |
| Other                                                                                                 | [Blank]                                                   | [Blank] | 49.22 (0.38–6426.23)                                         | 0.117   | 0.82 (0.02–29.67)                                                | 0.913   | 1.01 (0.27–3.79)                                                     | 0.990   |
| <b>Prefecture (SA)</b>                                                                                |                                                           |         |                                                              |         |                                                                  |         |                                                                      |         |
| Hokkaido                                                                                              | –                                                         | –       | –                                                            | –       | –                                                                | –       | 0.96 (0.71–1.29)                                                     | 0.794   |
| Aomori                                                                                                | –                                                         | –       | –                                                            | –       | –                                                                | –       | 1.58 (0.87–2.86)                                                     | 0.135   |
| Iwate                                                                                                 | –                                                         | –       | –                                                            | –       | –                                                                | –       | 0.75 (0.36–1.54)                                                     | 0.432   |
| Miyagi                                                                                                | –                                                         | –       | –                                                            | –       | –                                                                | –       | 0.79 (0.50–1.26)                                                     | 0.317   |
| Akita                                                                                                 | –                                                         | –       | –                                                            | –       | –                                                                | –       | 1.33 (0.62–2.84)                                                     | 0.467   |
| Yamagata                                                                                              | –                                                         | –       | –                                                            | –       | –                                                                | –       | 1.10 (0.52–2.31)                                                     | 0.799   |
| Fukushima                                                                                             | –                                                         | –       | –                                                            | –       | –                                                                | –       | 0.69 (0.39–1.25)                                                     | 0.222   |
| Ibaraki                                                                                               | –                                                         | –       | –                                                            | –       | –                                                                | –       | 1.08 (0.68–1.72)                                                     | 0.744   |
| Tochigi                                                                                               | –                                                         | –       | –                                                            | –       | –                                                                | –       | 0.86 (0.45–1.65)                                                     | 0.648   |
| Gunma                                                                                                 | –                                                         | –       | –                                                            | –       | –                                                                | –       | 0.64 (0.34–1.21)                                                     | 0.173   |
| Saitama                                                                                               | –                                                         | –       | –                                                            | –       | –                                                                | –       | 1.29 (1.01–1.66)                                                     | 0.043   |
| Chiba                                                                                                 | –                                                         | –       | –                                                            | –       | –                                                                | –       | 0.86 (0.67–1.11)                                                     | 0.246   |
| Tokyo                                                                                                 | –                                                         | –       | –                                                            | –       | –                                                                | –       | 1.00 (reference)                                                     | NA      |
| Kanagawa                                                                                              | –                                                         | –       | –                                                            | –       | –                                                                | –       | 1.10 (0.87–1.40)                                                     | 0.411   |
| Niigata                                                                                               | –                                                         | –       | –                                                            | –       | –                                                                | –       | 0.73 (0.45–1.20)                                                     | 0.215   |
| Toyama                                                                                                | –                                                         | –       | –                                                            | –       | –                                                                | –       | 1.36 (0.74–2.50)                                                     | 0.317   |
| Ishikawa                                                                                              | –                                                         | –       | –                                                            | –       | –                                                                | –       | 0.66 (0.34–1.28)                                                     | 0.214   |
| Fukui                                                                                                 | –                                                         | –       | –                                                            | –       | –                                                                | –       | 0.71 (0.27–1.90)                                                     | 0.495   |
| Yamanashi                                                                                             | –                                                         | –       | –                                                            | –       | –                                                                | –       | 1.60 (0.76–3.39)                                                     | 0.218   |
| Nagano                                                                                                | –                                                         | –       | –                                                            | –       | –                                                                | –       | 0.78 (0.47–1.28)                                                     | 0.329   |
| Gifu                                                                                                  | –                                                         | –       | –                                                            | –       | –                                                                | –       | 1.65 (1.00–2.72)                                                     | 0.052   |
| Shizuoka                                                                                              | –                                                         | –       | –                                                            | –       | –                                                                | –       | 0.93 (0.61–1.43)                                                     | 0.754   |

|                                                             |                  |       |                   |       |                   |       |                  |       |
|-------------------------------------------------------------|------------------|-------|-------------------|-------|-------------------|-------|------------------|-------|
| Aichi                                                       | –                | –     | –                 | –     | –                 | –     | 1.02 (0.80–1.32) | 0.849 |
| Mie                                                         | –                | –     | –                 | –     | –                 | –     | 0.74 (0.41–1.31) | 0.298 |
| Shiga                                                       | –                | –     | –                 | –     | –                 | –     | 1.24 (0.67–2.30) | 0.502 |
| Kyoto                                                       | –                | –     | –                 | –     | –                 | –     | 1.05 (0.68–1.62) | 0.841 |
| Osaka                                                       | –                | –     | –                 | –     | –                 | –     | 1.06 (0.83–1.35) | 0.661 |
| Hyogo                                                       | –                | –     | –                 | –     | –                 | –     | 1.19 (0.89–1.59) | 0.243 |
| Nara                                                        | –                | –     | –                 | –     | –                 | –     | 1.64 (0.93–2.91) | 0.090 |
| Wakayama                                                    | –                | –     | –                 | –     | –                 | –     | 0.38 (0.15–0.95) | 0.040 |
| Tottori                                                     | –                | –     | –                 | –     | –                 | –     | 1.72 (0.73–4.07) | 0.214 |
| Shimane                                                     | –                | –     | –                 | –     | –                 | –     | 0.15 (0.04–0.60) | 0.007 |
| Okayama                                                     | –                | –     | –                 | –     | –                 | –     | 1.47 (0.92–2.34) | 0.110 |
| Hiroshima                                                   | –                | –     | –                 | –     | –                 | –     | 1.17 (0.78–1.76) | 0.438 |
| Yamaguchi                                                   | –                | –     | –                 | –     | –                 | –     | 0.66 (0.33–1.33) | 0.246 |
| Tokushima                                                   | –                | –     | –                 | –     | –                 | –     | 1.73 (0.82–3.67) | 0.151 |
| Kagawa                                                      | –                | –     | –                 | –     | –                 | –     | 0.91 (0.45–1.86) | 0.805 |
| Ehime                                                       | –                | –     | –                 | –     | –                 | –     | 1.19 (0.69–2.07) | 0.526 |
| Kochi                                                       | –                | –     | –                 | –     | –                 | –     | 1.56 (0.56–4.36) | 0.400 |
| Fukuoka                                                     | –                | –     | –                 | –     | –                 | –     | 1.19 (0.91–1.57) | 0.204 |
| Saga                                                        | –                | –     | –                 | –     | –                 | –     | 1.16 (0.48–2.81) | 0.738 |
| Nagasaki                                                    | –                | –     | –                 | –     | –                 | –     | 1.15 (0.61–2.15) | 0.667 |
| Kumamoto                                                    | –                | –     | –                 | –     | –                 | –     | 0.69 (0.40–1.19) | 0.182 |
| Oita                                                        | –                | –     | –                 | –     | –                 | –     | 1.24 (0.62–2.47) | 0.548 |
| Miyazaki                                                    | –                | –     | –                 | –     | –                 | –     | 1.13 (0.54–2.35) | 0.748 |
| Kagoshima                                                   | –                | –     | –                 | –     | –                 | –     | 1.17 (0.64–2.14) | 0.606 |
| Okinawa                                                     | –                | –     | –                 | –     | –                 | –     | 0.76 (0.40–1.47) | 0.419 |
| Highest educational level (SA)                              | 0.79 (0.52–1.22) | 0.293 | 0.88 (0.74–1.05)  | 0.163 | 0.96 (0.76–1.21)  | 0.718 | 1.06 (1.00–1.14) | 0.069 |
| Occupation type (SA)                                        |                  |       |                   |       |                   |       |                  |       |
| Agriculture, forestry and fisheries                         | –                | –     | 0.22 (0.02–2.55)  | 0.228 | 0.17 (0.02–1.56)  | 0.117 | 1.30 (0.53–3.22) | 0.566 |
| Construction                                                | –                | –     | 0.41 (0.07–2.52)  | 0.336 | 4.04 (1.03–15.91) | 0.046 | 1.16 (0.78–1.74) | 0.467 |
| Manufacturing                                               | –                | –     | 0.76 (0.16–3.74)  | 0.738 | 0.71 (0.21–2.35)  | 0.569 | 1.11 (0.82–1.50) | 0.505 |
| Information and communications                              | –                | –     | 1.75 (0.24–12.51) | 0.578 | 1.53 (0.30–7.76)  | 0.609 | 1.05 (0.70–1.58) | 0.816 |
| Transportation and postal services                          | –                | –     | 0.36 (0.03–4.41)  | 0.421 | 0.80 (0.16–3.96)  | 0.782 | 1.64 (1.08–2.49) | 0.019 |
| Wholesale and retail trade                                  | –                | –     | 0.28 (0.07–1.14)  | 0.076 | 0.59 (0.15–2.39)  | 0.459 | 1.13 (0.81–1.58) | 0.468 |
| Finance and insurance                                       | –                | –     | 2.48 (0.24–25.18) | 0.443 | 0.62 (0.09–4.12)  | 0.620 | 1.89 (1.24–2.90) | 0.003 |
| Real estate and goods rental and leasing                    | –                | –     | 0.67 (0.13–3.44)  | 0.627 | 2.98 (0.52–17.13) | 0.221 | 0.98 (0.54–1.75) | 0.932 |
| Scientific research, professional and technical services    | –                | –     | 0.12 (0.01–1.52)  | 0.101 | 2.32 (0.22–24.35) | 0.484 | 1.14 (0.65–1.99) | 0.639 |
| Accommodations, food and beverage services                  | –                | –     | 0.06 (0.00–0.80)  | 0.033 | 1.31 (0.14–11.96) | 0.813 | 1.03 (0.66–1.61) | 0.888 |
| Living-related and personal services and amusement services | –                | –     | 3.21 (0.48–21.62) | 0.231 | 1.55 (0.21–11.43) | 0.665 | 1.59 (0.97–2.59) | 0.065 |

|                                                                                                                                        |                   |       |                  |        |                   |       |                  |        |
|----------------------------------------------------------------------------------------------------------------------------------------|-------------------|-------|------------------|--------|-------------------|-------|------------------|--------|
| Education and learning support                                                                                                         | –                 | –     | 0.60 (0.11–3.18) | 0.545  | 2.28 (0.55–9.38)  | 0.254 | 1.12 (0.75–1.68) | 0.567  |
| Healthcare and welfare                                                                                                                 | –                 | –     | 1.00 (reference) | NA     | 1.00 (reference)  | NA    | 1.00 (reference) | NA     |
| Combined services                                                                                                                      | –                 | –     | 0.00 (0.00–0.00) | <0.001 | 3.93 (0.73–21.10) | 0.111 | 2.05 (1.06–3.96) | 0.032  |
| Services (not elsewhere classified)                                                                                                    | –                 | –     | 0.39 (0.11–1.32) | 0.128  | 1.22 (0.36–4.07)  | 0.752 | 1.19 (0.87–1.64) | 0.270  |
| Public service (not elsewhere classified)                                                                                              | –                 | –     | 0.38 (0.05–2.84) | 0.344  | 0.87 (0.17–4.41)  | 0.864 | 1.69 (1.13–2.52) | 0.011  |
| Students                                                                                                                               | –                 | –     |                  |        | 0.41 (0.07–2.57)  | 0.340 | 2.13 (1.40–3.23) | <0.001 |
| Homemaker                                                                                                                              | –                 | –     | 0.31 (0.11–0.91) | 0.033  | 1.33 (0.42–4.19)  | 0.628 | 1.12 (0.83–1.52) | 0.445  |
| Others                                                                                                                                 | –                 | –     | 0.43 (0.15–1.27) | 0.128  | 1.42 (0.46–4.39)  | 0.546 | 1.49 (1.09–2.05) | 0.014  |
| Annual household income in 2020 (SA)                                                                                                   | 1.17 (1.00–1.38)  | 0.055 | 0.99 (0.92–1.06) | 0.745  | 1.04 (0.96–1.14)  | 0.344 | 0.99 (0.97–1.01) | 0.480  |
| <b>Healthcare-related characteristics, including health literacy</b>                                                                   |                   |       |                  |        |                   |       |                  |        |
| Self-reported health status (SA)                                                                                                       |                   |       |                  |        |                   |       |                  |        |
| Very good                                                                                                                              | 0.74 (0.15–3.53)  | 0.702 | 1.31 (0.80–2.16) | 0.281  | 0.73 (0.33–1.59)  | 0.427 | 0.97 (0.81–1.16) | 0.706  |
| Good                                                                                                                                   | 1.67 (0.56–4.95)  | 0.357 | 1.24 (0.79–1.95) | 0.342  | 0.81 (0.41–1.58)  | 0.534 | 0.97 (0.81–1.15) | 0.701  |
| Fair                                                                                                                                   | 1.00 (reference)  | NA    | 1.00 (reference) | NA     | 1.00 (reference)  | NA    | 1.00 (reference) | NA     |
| Poor                                                                                                                                   | 2.05 (0.70–5.96)  | 0.190 | 1.75 (0.88–3.47) | 0.109  | 1.42 (0.72–2.80)  | 0.313 | 0.87 (0.68–1.11) | 0.265  |
| Very poor                                                                                                                              | 2.14 (0.37–12.53) | 0.397 | 1.00 (0.24–4.14) | 0.996  | 1.29 (0.51–3.25)  | 0.593 | 0.95 (0.59–1.53) | 0.825  |
| Have you ever received a COVID-19 test? (SA)                                                                                           |                   |       |                  |        |                   |       |                  |        |
| No                                                                                                                                     | –                 | –     | –                | –      | 0.24 (0.04–1.35)  | 0.106 | 0.82 (0.30–2.24) | 0.704  |
| Yes – PCR test                                                                                                                         | –                 | –     | –                | –      | 0.20 (0.04–1.00)  | 0.050 | 0.55 (0.21–1.45) | 0.227  |
| Yes – antigen test                                                                                                                     | –                 | –     | –                | –      | 1.57 (0.33–7.41)  | 0.567 | 0.69 (0.27–1.74) | 0.428  |
| Yes – antibody testing                                                                                                                 | –                 | –     | –                | –      | 0.19 (0.03–1.33)  | 0.094 | 0.94 (0.34–2.54) | 0.896  |
| Yes – unsure about either of the three                                                                                                 | –                 | –     | –                | –      | 0.14 (0.02–1.04)  | 0.055 | 0.94 (0.32–2.78) | 0.907  |
| Preventive measures against COVID-19 (MA)                                                                                              |                   |       |                  |        |                   |       |                  |        |
| Avoid going to places with poor ventilation                                                                                            | 0.36 (0.14–0.93)  | 0.035 | 0.83 (0.54–1.27) | 0.381  | 1.04 (0.60–1.81)  | 0.890 | 0.98 (0.84–1.13) | 0.749  |
| Avoid going to places where there are many people gathered                                                                             | 0.15 (0.04–0.51)  | 0.003 | 1.22 (0.72–2.07) | 0.453  | 0.80 (0.45–1.42)  | 0.439 | 1.17 (0.99–1.38) | 0.061  |
| Avoid talking or speaking in close proximity to other people                                                                           | 1.52 (0.53–4.32)  | 0.435 | 1.33 (0.86–2.08) | 0.204  | 0.91 (0.51–1.64)  | 0.758 | 1.00 (0.85–1.17) | 1.000  |
| Washing hands, gargling, and hand disinfection with alcohol.                                                                           | 0.80 (0.20–3.21)  | 0.753 | 0.55 (0.33–0.94) | 0.030  | 0.62 (0.32–1.20)  | 0.155 | 0.91 (0.76–1.08) | 0.280  |
| Etiquette (masks, handkerchiefs, etc.) in case of coughing or sneezing                                                                 | 1.27 (0.40–4.06)  | 0.682 | 1.27 (0.79–2.03) | 0.323  | 0.78 (0.42–1.45)  | 0.431 | 0.85 (0.72–1.00) | 0.048  |
| Telework                                                                                                                               | 1.52 (0.10–22.27) | 0.762 | 0.98 (0.31–3.05) | 0.968  | 1.01 (0.43–2.33)  | 0.988 | 1.00 (0.79–1.28) | 0.981  |
| Be conscious of social distancing                                                                                                      | 2.63 (0.95–7.29)  | 0.063 | 1.24 (0.82–1.87) | 0.315  | 0.78 (0.42–1.47)  | 0.446 | 0.93 (0.79–1.09) | 0.384  |
| Avoid going out unnecessarily.                                                                                                         | 1.92 (0.62–5.97)  | 0.260 | 0.88 (0.57–1.37) | 0.579  | 1.28 (0.71–2.30)  | 0.417 | 0.83 (0.72–0.97) | 0.016  |
| Other preventive measures                                                                                                              | 1.89 (0.31–11.53) | 0.492 | 1.04 (0.44–2.46) | 0.926  | 0.69 (0.19–2.55)  | 0.576 | 1.06 (0.72–1.57) | 0.766  |
| No preventive measures                                                                                                                 | 5.18 (0.52–51.26) | 0.160 | 0.54 (0.20–1.43) | 0.213  | 0.31 (0.09–1.07)  | 0.063 | 1.04 (0.78–1.39) | 0.774  |
| Have you ever refrained from visiting a medical institution because you were anxious about being infected by the new coronavirus? (MA) |                   |       |                  |        |                   |       |                  |        |
| Have refrained from regular hospital visits                                                                                            | –                 | –     | 0.57 (0.27–1.22) | 0.148  | 1.05 (0.50–2.24)  | 0.891 | 0.82 (0.60–1.12) | 0.221  |



|                                                                                                                                 |                     |       |                   |        |                   |        |                  |        |
|---------------------------------------------------------------------------------------------------------------------------------|---------------------|-------|-------------------|--------|-------------------|--------|------------------|--------|
| Have refrained from visiting the hospital for sudden symptoms such as a cold, headache, or stomachache                          | –                   | –     | 0.69 (0.27–1.80)  | 0.450  | 2.27 (1.08–4.78)  | 0.031  | 1.07 (0.79–1.46) | 0.649  |
| Have refrained from medical checkups, physical examinations, or cancer screenings                                               | –                   | –     | 1.24 (0.59–2.62)  | 0.577  | 1.61 (0.76–3.40)  | 0.216  | 0.86 (0.63–1.18) | 0.359  |
| Have refrained from other medical examinations                                                                                  | –                   | –     | 0.80 (0.37–1.73)  | 0.570  | 1.47 (0.61–3.55)  | 0.394  | 1.02 (0.73–1.42) | 0.920  |
| No                                                                                                                              | –                   | –     | 0.80 (0.36–1.77)  | 0.584  | 2.27 (1.00–5.16)  | 0.051  | 1.15 (0.83–1.58) | 0.398  |
| <b>How confident are you filling out medical forms by yourself? (health literacy) (SA)</b>                                      |                     |       |                   |        |                   |        |                  |        |
| Not at all                                                                                                                      | –                   | –     | 1.33 (0.13–13.72) | 0.810  | 0.60 (0.18–1.94)  | 0.389  | 2.11 (1.33–3.35) | 0.001  |
| A little bit                                                                                                                    | –                   | –     | 0.49 (0.12–1.95)  | 0.311  | 1.60 (0.73–3.47)  | 0.239  | 1.51 (1.14–1.99) | 0.004  |
| Somewhat                                                                                                                        | –                   | –     | 1.00 (reference)  | NA     | 1.00 (reference)  | NA     | 1.00 (reference) | NA     |
| Extremely                                                                                                                       | –                   | –     | 1.15 (0.70–1.89)  | 0.579  | 1.49 (0.81–2.74)  | 0.201  | 1.11 (0.94–1.31) | 0.224  |
| Quite a bit                                                                                                                     | –                   | –     | 1.80 (1.03–3.15)  | 0.038  | 0.87 (0.39–1.94)  | 0.728  | 1.29 (1.06–1.58) | 0.011  |
| <b>Psychological characteristics</b>                                                                                            |                     |       |                   |        |                   |        |                  |        |
| <b>How anxious are you about COVID-19? (SA) – perceived risks of COVID-19</b>                                                   |                     |       |                   |        |                   |        |                  |        |
| Not at all anxious                                                                                                              | 0.03 (0.00–0.26)    | 0.001 | 1.30 (0.50–3.39)  | 0.586  | 3.83 (1.34–10.94) | 0.012  | 1.62 (1.19–2.20) | 0.002  |
| Vaguely anxious                                                                                                                 | 0.10 (0.03–0.43)    | 0.002 | 0.45 (0.20–1.00)  | 0.050  | 1.52 (0.66–3.52)  | 0.325  | 1.03 (0.79–1.33) | 0.852  |
| Have a clear sense of anxiety                                                                                                   | 0.22 (0.05–0.93)    | 0.039 | 0.22 (0.09–0.54)  | <0.001 | 2.51 (1.05–5.95)  | 0.037  | 0.86 (0.65–1.13) | 0.277  |
| Feel fear and have anxiety                                                                                                      | 1.00 (reference)    | NA    | 1.00 (reference)  | NA     | 1.00 (reference)  | NA     | 1.00 (reference) | NA     |
| <b>What is your best guess as to whether you will get COVID-19 within the next 6 months? (SA) – perceived risks of COVID-19</b> |                     |       |                   |        |                   |        |                  |        |
| I don't think I will get COVID-19                                                                                               | –                   | –     | 1.66 (0.89–3.12)  | 0.112  | 1.52 (0.83–2.79)  | 0.178  | 1.32 (1.04–1.66) | 0.021  |
| I think I will get a mild case of COVID-19                                                                                      | –                   | –     | 0.87 (0.41–1.81)  | 0.705  | 1.07 (0.54–2.10)  | 0.853  | 0.97 (0.76–1.22) | 0.775  |
| I think I will get seriously ill from COVID-19                                                                                  | –                   | –     | 1.00 (reference)  | NA     | 1.00 (reference)  | NA     | 1.00 (reference) | NA     |
| I have already had COVID-19                                                                                                     | –                   | –     | 2.35 (0.20–27.73) | 0.498  | 2.56 (0.44–14.79) | 0.292  | 2.96 (1.64–5.35) | <0.001 |
| <b>How do you think the disadvantages of the COVID-19 vaccine are? (SA) – perceived risks of a COVID-19 vaccine</b>             |                     |       |                   |        |                   |        |                  |        |
| Very small                                                                                                                      | 1.09 (0.09–13.36)   | 0.943 | 0.35 (0.11–1.07)  | 0.066  | 0.08 (0.02–0.26)  | <0.001 | 0.16 (0.10–0.24) | <0.001 |
| Small                                                                                                                           | 0.65 (0.21–1.98)    | 0.448 | 0.38 (0.23–0.63)  | <0.001 | 0.23 (0.11–0.46)  | <0.001 | 0.47 (0.39–0.57) | <0.001 |
| Medium                                                                                                                          | 1.00 (reference)    | NA    | 1.00 (reference)  | NA     | 1.00 (reference)  | NA     | 1.00 (reference) | NA     |
| Large                                                                                                                           | 3.72 (1.23–11.28)   | 0.020 | 1.44 (0.90–2.30)  | 0.128  | 2.00 (0.97–4.11)  | 0.060  | 1.94 (1.61–2.34) | <0.001 |
| Very large                                                                                                                      | 16.08 (1.49–173.60) | 0.022 | 1.42 (0.34–5.96)  | 0.630  | 2.83 (0.87–9.26)  | 0.084  | 3.91 (2.47–6.18) | <0.001 |
| <b>Do you think getting a COVID-19 vaccine will ease your anxiety? (SA) – perceived benefits of a COVID-19 vaccine</b>          |                     |       |                   |        |                   |        |                  |        |
| Strongly disagree                                                                                                               | 2.10 (0.26–17.08)   | 0.486 | 6.78 (2.25–20.43) | <0.001 | 2.72 (0.88–8.42)  | 0.082  | 2.84 (1.99–4.04) | <0.001 |
| Disagree                                                                                                                        | 1.30 (0.49–3.41)    | 0.597 | 2.06 (1.34–3.17)  | <0.001 | 1.55 (0.81–3.00)  | 0.189  | 1.83 (1.53–2.19) | <0.001 |
| Neither agree nor disagree                                                                                                      | 1.00 (reference)    | NA    | 1.00 (reference)  | NA     | 1.00 (reference)  | NA     | 1.00 (reference) | NA     |

|                                                                                                                                                 |                     |        |                     |        |                    |        |                  |        |
|-------------------------------------------------------------------------------------------------------------------------------------------------|---------------------|--------|---------------------|--------|--------------------|--------|------------------|--------|
| Agree                                                                                                                                           | 0.10 (0.02–0.42)    | 0.002  | 0.51 (0.29–0.90)    | 0.020  | 1.06 (0.48–2.34)   | 0.877  | 0.65 (0.54–0.79) | <0.001 |
| Strongly agree                                                                                                                                  | 0.10 (0.00–23.95)   | 0.409  | 0.23 (0.03–1.99)    | 0.181  | 4.60 (0.45–46.76)  | 0.197  | 1.22 (0.65–2.28) | 0.539  |
| If others have been vaccinated against COVID-19, do you think you should be vaccinated as well? (SA) – perceived norms about a COVID-19 vaccine |                     |        |                     |        |                    |        |                  |        |
| Strongly disagree                                                                                                                               | 16.86 (2.27–125.13) | 0.006  | 9.76 (3.25–29.28)   | <0.001 | 10.55 (3.73–29.81) | <0.001 | 6.28 (4.31–9.14) | <0.001 |
| Disagree                                                                                                                                        | 14.74 (4.76–45.67)  | <0.001 | 4.16 (2.69–6.42)    | <0.001 | 4.51 (2.30–8.81)   | <0.001 | 3.41 (2.82–4.12) | <0.001 |
| Neither agree nor disagree                                                                                                                      | 1.00 (reference)    | NA     | 1.00 (reference)    | NA     | 1.00 (reference)   | NA     | 1.00 (reference) | NA     |
| Agree                                                                                                                                           | 0.10 (0.03–0.42)    | 0.001  | 0.03 (0.01–0.07)    | <0.001 | 0.07 (0.03–0.16)   | <0.001 | 0.17 (0.14–0.20) | <0.001 |
| Strongly agree                                                                                                                                  | 0.03 (0.00–3.71)    | 0.148  | 0.10 (0.03–0.37)    | <0.001 | 0.04 (0.01–0.28)   | 0.001  | 0.02 (0.01–0.04) | <0.001 |
| Do you trust scientists in the field of vaccine development for COVID-19? (SA) – trusts about COVID-19 vaccine                                  |                     |        |                     |        |                    |        |                  |        |
| Strongly distrust                                                                                                                               | 0.14 (0.01–3.42)    | 0.225  | 10.74 (0.82–140.41) | 0.070  | 0.30 (0.06–1.45)   | 0.135  | 0.76 (0.39–1.49) | 0.429  |
| Distrust                                                                                                                                        | 1.10 (0.27–4.50)    | 0.893  | 1.33 (0.65–2.70)    | 0.433  | 0.70 (0.30–1.62)   | 0.403  | 1.03 (0.78–1.35) | 0.858  |
| Neutral                                                                                                                                         | 1.00 (reference)    | NA     | 1.00 (reference)    | NA     | 1.00 (reference)   | NA     | 1.00 (reference) | NA     |
| Trust                                                                                                                                           | 0.73 (0.24–2.17)    | 0.570  | 0.89 (0.53–1.49)    | 0.657  | 0.61 (0.28–1.35)   | 0.220  | 0.87 (0.71–1.07) | 0.192  |
| Strongly trust                                                                                                                                  | 0.19 (0.00–53.36)   | 0.561  | 0.45 (0.04–4.62)    | 0.504  | 0.19 (0.02–1.72)   | 0.139  | 0.72 (0.37–1.39) | 0.324  |
| Do you trust the public authorities to approve vaccines for COVID-19? (SA) – trusts about COVID-19 vaccine                                      |                     |        |                     |        |                    |        |                  |        |
| Strongly distrust                                                                                                                               | 13.57 (1.30–141.86) | 0.029  | 12.07 (2.81–51.85)  | <0.001 | 4.52 (1.35–15.17)  | 0.015  | 2.97 (1.82–4.85) | <0.001 |
| Distrust                                                                                                                                        | 2.61 (0.74–9.19)    | 0.134  | 2.55 (1.52–4.29)    | <0.001 | 0.78 (0.36–1.69)   | 0.532  | 1.90 (1.52–2.38) | <0.001 |
| Neutral                                                                                                                                         | 1.00 (reference)    | NA     | 1.00 (reference)    | NA     | 1.00 (reference)   | NA     | 1.00 (reference) | NA     |
| Trust                                                                                                                                           | 1.92 (0.54–6.80)    | 0.312  | 0.62 (0.34–1.13)    | 0.118  | 1.26 (0.57–2.80)   | 0.573  | 0.76 (0.61–0.94) | 0.011  |
| Strongly trust                                                                                                                                  | 1.37 (0.00–466.17)  | 0.915  | 3.22 (0.33–31.35)   | 0.313  | 9.23 (0.84–101.67) | 0.069  | 0.55 (0.26–1.16) | 0.116  |
| Do you trust your healthcare provider about vaccination against COVID-19? (SA) – trusts about COVID-19 vaccine                                  |                     |        |                     |        |                    |        |                  |        |
| Strongly distrust                                                                                                                               | –                   | –      | 0.09 (0.01–1.05)    | 0.055  | 0.74 (0.15–3.68)   | 0.708  | 1.28 (0.59–2.76) | 0.526  |
| Distrust                                                                                                                                        | –                   | –      | 1.44 (0.66–3.14)    | 0.358  | 1.85 (0.80–4.31)   | 0.153  | 0.84 (0.62–1.15) | 0.280  |
| Neutral                                                                                                                                         | –                   | –      | 1.00 (reference)    | NA     | 1.00 (reference)   | NA     | 1.00 (reference) | NA     |
| Trust                                                                                                                                           | –                   | –      | 0.74 (0.45–1.21)    | 0.231  | 0.38 (0.19–0.75)   | 0.005  | 0.68 (0.57–0.82) | <0.001 |
| Strongly trust                                                                                                                                  | –                   | –      | 0.45 (0.09–2.34)    | 0.344  | 0.24 (0.05–1.13)   | 0.071  | 0.81 (0.51–1.28) | 0.372  |
| Do you think that healthcare workers and employees of elderly care facilities should be vaccinated? (SA) – belief about COVID-19 vaccine        |                     |        |                     |        |                    |        |                  |        |
| Yes                                                                                                                                             | 0.02 (0.00–0.19)    | <0.001 | 0.21 (0.07–0.60)    | 0.004  | 0.23 (0.10–0.51)   | <0.001 | 0.14 (0.10–0.18) | <0.001 |
| No                                                                                                                                              | 1.00 (reference)    | NA     | 1.00 (reference)    | NA     | 1.00 (reference)   | NA     | 1.00 (reference) | NA     |
| Can't say either                                                                                                                                | 0.23 (0.02–2.34)    | 0.214  | 1.19 (0.40–3.53)    | 0.759  | 1.01 (0.43–2.35)   | 0.986  | 0.51 (0.39–0.68) | <0.001 |
| Do you receive an influenza vaccine? (SA)                                                                                                       |                     |        |                     |        |                    |        |                  |        |
| Every year                                                                                                                                      | 1.00 (reference)    | NA     | 1.00 (reference)    | NA     | 1.00 (reference)   | NA     | 1.00 (reference) | NA     |

|                                                                                                                                                                                      |                    |        |                    |        |                   |        |                  |        |
|--------------------------------------------------------------------------------------------------------------------------------------------------------------------------------------|--------------------|--------|--------------------|--------|-------------------|--------|------------------|--------|
| Every few years                                                                                                                                                                      | 3.72 (1.01–13.68)  | 0.048  | 3.55 (1.78–7.08)   | <0.001 | 2.48 (1.18–5.22)  | 0.017  | 1.68 (1.36–2.09) | <0.001 |
| Rarely or never                                                                                                                                                                      | 19.17 (6.60–55.68) | <0.001 | 15.92 (9.12–27.81) | <0.001 | 8.00 (4.04–15.86) | <0.001 | 4.64 (3.91–5.50) | <0.001 |
| <b>Information sources about COVID-19 (MA)</b>                                                                                                                                       |                    |        |                    |        |                   |        |                  |        |
| Physicians                                                                                                                                                                           | 2.14 (0.87–2.34)   | 0.097  | 0.58 (0.29–1.16)   | 0.122  | 0.48 (0.24–0.93)  | 0.029  | 0.64 (0.49–0.84) | 0.001  |
| Nurses                                                                                                                                                                               | –                  | –      | –                  | –      | 0.20 (0.08–0.51)  | <0.001 | 0.85 (0.58–1.25) | 0.408  |
| Pharmacists                                                                                                                                                                          | –                  | –      | 1.33 (0.34–5.26)   | 0.681  | –                 | –      | 1.40 (0.80–2.45) | 0.237  |
| Dentists                                                                                                                                                                             | –                  | –      | 1.92 (0.39–9.56)   | 0.425  | –                 | –      | –                | –      |
| Newspapers                                                                                                                                                                           | –                  | –      | 0.87 (0.60–1.28)   | 0.493  | 0.40 (0.21–0.78)  | 0.007  | 0.80 (0.67–0.95) | 0.012  |
| Books                                                                                                                                                                                | –                  | –      | –                  | –      | –                 | –      | 0.71 (0.46–1.11) | 0.132  |
| Scientific literature                                                                                                                                                                | –                  | –      | –                  | –      | 0.68 (0.11–4.32)  | 0.683  | –                | –      |
| Television                                                                                                                                                                           | –                  | –      | 0.45 (0.28–0.75)   | 0.002  | 0.62 (0.34–1.15)  | 0.132  | 0.76 (0.65–0.90) | 0.001  |
| Radio                                                                                                                                                                                | –                  | –      | 0.82 (0.50–1.34)   | 0.428  | 1.87 (0.86–4.03)  | 0.112  | 1.02 (0.81–1.29) | 0.836  |
| Internet news sites                                                                                                                                                                  | 1.60 (0.65–3.88)   | 0.304  | 0.88 (0.59–1.31)   | 0.533  | 0.83 (0.47–1.45)  | 0.509  | 1.04 (0.90–1.20) | 0.612  |
| Search engines (Google, Yahoo, etc.)                                                                                                                                                 | 0.41 (0.12–1.35)   | 0.143  | 0.61 (0.36–1.04)   | 0.069  | 1.23 (0.61–2.47)  | 0.569  | 1.17 (0.99–1.38) | 0.068  |
| LINE                                                                                                                                                                                 | –                  | –      | 0.55 (0.22–1.36)   | 0.198  | –                 | –      | 0.89 (0.68–1.17) | 0.408  |
| Facebook                                                                                                                                                                             | –                  | –      | 2.05 (0.64–6.57)   | 0.230  | –                 | –      | 0.43 (0.25–0.74) | 0.002  |
| Twitter                                                                                                                                                                              | –                  | –      | –                  | –      | 1.37 (0.59–3.19)  | 0.463  | 1.11 (0.88–1.39) | 0.398  |
| Instagram                                                                                                                                                                            | –                  | –      | –                  | –      | –                 | –      | –                | –      |
| YouTube                                                                                                                                                                              | –                  | –      | 0.96 (0.43–2.16)   | 0.926  | –                 | –      | 1.11 (0.83–1.50) | 0.481  |
| Medical information sites                                                                                                                                                            | –                  | –      | –                  | –      | –                 | –      | 0.59 (0.37–0.96) | 0.035  |
| Blogs or web pages of celebrities and famous people                                                                                                                                  | –                  | –      | –                  | –      | –                 | –      | 1.66 (1.02–2.72) | 0.042  |
| Local governments such as prefectures and municipalities                                                                                                                             | 2.08 (0.82–5.31)   | 0.124  | 0.84 (0.56–1.27)   | 0.420  | 0.66 (0.32–1.34)  | 0.249  | 0.77 (0.63–0.95) | 0.016  |
| Government                                                                                                                                                                           | –                  | –      | –                  | –      | 1.08 (0.48–2.46)  | 0.845  | 1.00 (0.78–1.28) | 0.990  |
| Medical task-force advising the government, known as the Novel Coronavirus Expert Meeting (re-established as Novel Coronavirus Infectious Disease Control Subcommittee in July 2020) | –                  | –      | 1.28 (0.66–2.48)   | 0.473  | –                 | –      | 0.66 (0.46–0.96) | 0.031  |
| Friends                                                                                                                                                                              | –                  | –      | 0.99 (0.58–1.72)   | 0.981  | 2.34 (0.78–7.02)  | 0.129  | 0.93 (0.71–1.21) | 0.568  |
| Family members                                                                                                                                                                       | –                  | –      | 1.27 (0.78–2.07)   | 0.328  | 0.83 (0.32–2.18)  | 0.710  | 1.15 (0.91–1.45) | 0.239  |
| Scientists and researchers                                                                                                                                                           | –                  | –      | –                  | –      | 7.97 (1.81–35.14) | 0.006  | –                | –      |
| Other companies                                                                                                                                                                      | –                  | –      | –                  | –      | 3.93 (1.30–11.92) | 0.016  | 1.24 (0.89–1.71) | 0.197  |
| <b>Trust levels in information sources (MA)</b>                                                                                                                                      |                    |        |                    |        |                   |        |                  |        |
| Physicians                                                                                                                                                                           | –                  | –      | 1.46 (0.90–2.36)   | 0.124  | 0.75 (0.47–1.20)  | 0.230  | 1.02 (0.86–1.20) | 0.840  |
| Nurses                                                                                                                                                                               | 1.49 (0.54–4.10)   | 0.438  | 0.74 (0.42–1.29)   | 0.286  | 2.35 (1.32–4.17)  | 0.004  | 0.93 (0.77–1.12) | 0.438  |
| Pharmacists                                                                                                                                                                          | 1.08 (0.41–2.86)   | 0.874  | 1.48 (0.92–2.38)   | 0.107  | 0.86 (0.50–1.47)  | 0.584  | 1.26 (1.07–1.49) | 0.006  |
| Veterinarians                                                                                                                                                                        | 0.51 (0.24–1.08)   | 0.079  | 0.98 (0.66–1.47)   | 0.928  | 1.18 (0.73–1.88)  | 0.499  | 0.86 (0.74–1.00) | 0.046  |
| Dentists                                                                                                                                                                             | –                  | –      | 0.66 (0.43–1.00)   | 0.052  | 1.00 (0.60–1.68)  | 0.992  | 0.89 (0.76–1.03) | 0.115  |
| Health fairs and events                                                                                                                                                              | 1.26 (0.57–2.75)   | 0.567  | 0.95 (0.64–1.41)   | 0.793  | –                 | –      | 1.12 (0.97–1.28) | 0.121  |
| Newspapers                                                                                                                                                                           | –                  | –      | 0.86 (0.58–1.27)   | 0.459  | 1.31 (0.81–2.12)  | 0.274  | 0.95 (0.82–1.11) | 0.525  |

|                                                          |                  |       |                  |       |                  |       |                  |       |
|----------------------------------------------------------|------------------|-------|------------------|-------|------------------|-------|------------------|-------|
| Magazines                                                | –                | –     | –                | –     | 1.17 (0.67–2.05) | 0.581 | 1.19 (1.00–1.42) | 0.049 |
| Books                                                    | –                | –     | 1.34 (0.88–2.04) | 0.171 | 1.62 (0.92–2.87) | 0.097 | 1.04 (0.87–1.24) | 0.665 |
| Scientific literature                                    | 0.85 (0.40–1.79) | 0.661 | 1.16 (0.81–1.67) | 0.413 | 0.72 (0.46–1.13) | 0.153 | 0.91 (0.79–1.04) | 0.149 |
| Television                                               | 1.03 (0.40–2.61) | 0.956 | 0.76 (0.45–1.29) | 0.308 | –                | –     | 1.10 (0.95–1.29) | 0.214 |
| Radio                                                    | –                | –     | 0.84 (0.50–1.42) | 0.519 | 0.89 (0.56–1.41) | 0.610 | 0.82 (0.70–0.96) | 0.017 |
| Internet news sites                                      | 0.78 (0.26–2.35) | 0.660 | 1.55 (0.98–2.45) | 0.060 | 0.90 (0.53–1.52) | 0.688 | 0.90 (0.76–1.07) | 0.229 |
| Search engines (Google, Yahoo, etc.)                     | 2.35 (0.82–6.77) | 0.114 | 1.00 (0.63–1.57) | 0.999 | 1.20 (0.70–2.04) | 0.503 | 1.15 (0.97–1.36) | 0.100 |
| LINE                                                     | 0.61 (0.20–1.89) | 0.394 | 0.64 (0.39–1.06) | 0.083 | 1.25 (0.78–2.00) | 0.354 | 0.89 (0.75–1.04) | 0.146 |
| Facebook                                                 | 1.60 (0.43–5.96) | 0.483 | 1.22 (0.57–2.59) | 0.612 | –                | –     | 1.04 (0.84–1.29) | 0.689 |
| Twitter                                                  | –                | –     | –                | –     | –                | –     | 1.03 (0.84–1.26) | 0.783 |
| Instagram                                                | –                | –     | 1.25 (0.58–2.70) | 0.565 | –                | –     | 0.98 (0.78–1.23) | 0.852 |
| YouTube                                                  | 1.14 (0.38–3.47) | 0.813 | 1.18 (0.69–2.04) | 0.549 | 0.57 (0.36–0.91) | 0.018 | 1.30 (1.09–1.55) | 0.003 |
| TikTok                                                   | –                | –     | –                | –     | –                | –     | 0.80 (0.67–0.95) | 0.013 |
| Medical information sites                                | 0.71 (0.31–1.62) | 0.419 | 0.60 (0.43–0.84) | 0.003 | 1.11 (0.73–1.68) | 0.619 | 0.99 (0.87–1.12) | 0.840 |
| Blogs or web pages of celebrities and famous people      | 1.87 (0.71–4.89) | 0.204 | 0.80 (0.53–1.22) | 0.301 | 0.80 (0.50–1.28) | 0.343 | 0.94 (0.81–1.08) | 0.372 |
| Local governments such as prefectures and municipalities | 0.45 (0.17–1.15) | 0.095 | –                | –     | 0.84 (0.52–1.36) | 0.488 | 1.01 (0.87–1.17) | 0.938 |
| Government                                               | 2.80 (1.13–6.96) | 0.027 | 1.05 (0.74–1.49) | 0.789 | 0.76 (0.48–1.22) | 0.259 | 1.06 (0.92–1.21) | 0.420 |
| Medical task-force advising the government               | 0.75 (0.31–1.83) | 0.532 | 1.16 (0.81–1.67) | 0.407 | 1.33 (0.84–2.10) | 0.230 | 1.00 (0.87–1.16) | 0.956 |
| Friends                                                  | 0.64 (0.26–1.57) | 0.329 | 1.27 (0.85–1.89) | 0.238 | 1.47 (0.89–2.43) | 0.133 | 1.23 (1.05–1.44) | 0.009 |
| Family members                                           | 0.85 (0.41–1.77) | 0.671 | 1.07 (0.76–1.50) | 0.708 | 0.61 (0.37–1.00) | 0.048 | 1.02 (0.88–1.17) | 0.805 |
| Scientists and researchers                               | –                | –     | –                | –     | 0.51 (0.30–0.88) | 0.015 | 1.04 (0.89–1.21) | 0.625 |
| Pharmaceutical companies                                 | 1.35 (0.58–3.12) | 0.484 | 0.93 (0.61–1.41) | 0.732 | 1.65 (0.99–2.75) | 0.053 | 0.90 (0.76–1.06) | 0.206 |
| Other companies                                          | 1.22 (0.45–3.31) | 0.689 | 1.23 (0.80–1.90) | 0.351 | –                | –     | 1.11 (0.94–1.31) | 0.217 |

1 The estimates were derived from the multinomial logistic regression, in reference to the COVID-19 vaccine acceptance group. An en-dash indicates that the variable was not  
2 included in the model. Blank indicates no samples. SA: single-answer questions; MA: multiple-answer question. Highest education levels and annual household income in  
3 2020 (ordinal scale questions) were also treated as continuous variables. Variables that are not on the tables were dropped in the process of optimal variable selection and  
4 were not statistically significant.

1

Supplementary Table 8: Reasons for responding 'not sure' or 'no' regarding intention to be vaccinated by Groups (A–D)

|                                                                                          | Group (A) elderly with underlying diseases |           |         |            | Group (B) elderly without underlying diseases |            |         |             | Group (C) younger adults with underlying diseases |            |         |            | Group (D) younger adults without underlying diseases |             |         |             |
|------------------------------------------------------------------------------------------|--------------------------------------------|-----------|---------|------------|-----------------------------------------------|------------|---------|-------------|---------------------------------------------------|------------|---------|------------|------------------------------------------------------|-------------|---------|-------------|
|                                                                                          | Not sure                                   | No        | P-value | Total      | Not sure                                      | No         | P-value | Total       | Not sure                                          | No         | P-value | Total      | Not sure                                             | No          | P-value | Total       |
|                                                                                          | N = 371                                    | N = 80    |         | N = 451    | N = 1611                                      | N = 364    |         | N = 1975    | N = 590                                           | N = 225    |         | N = 815    | N = 7302                                             | N = 2641    |         | N = 9943    |
| <b>What are reasons for refusing or being unsure to receive a COVID-19 vaccine? (MA)</b> |                                            |           |         |            |                                               |            |         |             |                                                   |            |         |            |                                                      |             |         |             |
| Specific anxiety about the COVID-19 vaccine                                              |                                            |           |         |            |                                               |            |         |             |                                                   |            |         |            |                                                      |             |         |             |
| Side effects and safety                                                                  | 321 (86.5)                                 | 67 (83.8) | 0.638   | 388 (86.0) | 1355 (84.1)                                   | 268 (73.6) | <0.001  | 1623 (82.2) | 487 (82.5)                                        | 142 (63.1) | <0.001  | 629 (77.2) | 5646 (77.3)                                          | 1781 (67.4) | <0.001  | 7427 (74.7) |
| Effectiveness                                                                            | 113 (30.5)                                 | 26 (32.5) | 0.822   | 139 (30.8) | 590 (36.6)                                    | 149 (40.9) | 0.140   | 739 (37.4)  | 182 (30.8)                                        | 64 (28.4)  | 0.560   | 246 (30.2) | 2224 (30.5)                                          | 750 (28.4)  | 0.051   | 2974 (29.9) |
| Not wanting to be the first to get a new vaccine                                         | 94 (25.3)                                  | 25 (31.3) | 0.343   | 119 (26.4) | 420 (26.1)                                    | 111 (30.5) | 0.098   | 531 (26.9)  | 131 (22.2)                                        | 52 (23.1)  | 0.854   | 183 (22.5) | 1630 (22.3)                                          | 766 (29.0)  | <0.001  | 2396 (24.1) |
| Rigor of clinical trials                                                                 | 75 (20.2)                                  | 25 (31.3) | 0.045   | 100 (22.2) | 354 (22.0)                                    | 99 (27.2)  | 0.038*  | 453 (22.9)  | 132 (22.4)                                        | 38 (16.9)  | 0.104   | 170 (20.9) | 1122 (15.4)                                          | 494 (18.7)  | <0.001  | 1616 (16.3) |
| Contents of the vaccine                                                                  | 37 (10.0)                                  | 19 (23.8) | 0.001   | 56 (12.4)  | 198 (12.3)                                    | 89 (24.5)  | <0.001  | 287 (14.5)  | 87 (14.7)                                         | 35 (15.6)  | 0.857   | 122 (15.0) | 777 (10.6)                                           | 451 (17.1)  | <0.001  | 1228 (12.4) |
| Others                                                                                   | 10 (2.7)                                   | 8 (10.0)  | 0.007   | 18 (4.0)   | 22 (1.4)                                      | 11 (3.0)   | 0.045*  | 33 (1.7)    | 14 (2.4)                                          | 11 (4.9)   | 0.102   | 25 (3.1)   | 85 (1.2)                                             | 64 (2.4)    | <0.001  | 149 (1.5)   |
| More information is needed to decide whether or not to get a COVID-19 vaccine            |                                            |           |         |            |                                               |            |         |             |                                                   |            |         |            |                                                      |             |         |             |
| Compatibility with personal health conditions (e.g., allergies, comorbidities)           | 245 (66.0)                                 | 47 (58.8) | 0.268   | 292 (64.7) | 848 (52.6)                                    | 168 (46.2) | 0.029*  | 1016 (51.4) | 363 (61.5)                                        | 85 (37.8)  | <0.001  | 448 (55.0) | 2886 (39.5)                                          | 777 (29.4)  | <0.001  | 3663 (36.8) |
| Doctors' recommendations                                                                 | 137 (36.9)                                 | 19 (23.8) | 0.034*  | 156 (34.6) | 450 (27.9)                                    | 38 (10.4)  | <0.001  | 488 (24.7)  | 174 (29.5)                                        | 31 (13.8)  | <0.001  | 205 (25.2) | 1331 (18.2)                                          | 243 (9.2)   | <0.001  | 1574 (15.8) |
| Depends on the pandemic situation                                                        | 55 (14.8)                                  | 10 (12.5) | 0.718   | 65 (14.4)  | 275 (17.1)                                    | 67 (18.4)  | 0.595   | 342 (17.3)  | 87 (14.7)                                         | 32 (14.2)  | 0.938   | 119 (14.6) | 1129 (15.5)                                          | 334 (12.6)  | <0.001  | 1463 (14.7) |
| Whether other people have been vaccinated or not                                         | 51 (13.7)                                  | 4 (5.0)   | 0.048*  | 55 (12.2)  | 284 (17.6)                                    | 24 (6.6)   | <0.001  | 308 (15.6)  | 95 (16.1)                                         | 25 (11.1)  | 0.092   | 120 (14.7) | 1469 (20.1)                                          | 297 (11.2)  | <0.001  | 1766 (17.8) |
| Others                                                                                   | 6 (1.6)                                    | 3 (3.8)   | 0.426   | 9 (2.0)    | 21 (1.3)                                      | 8 (2.2)    | 0.298   | 29 (1.5)    | 3 (0.5)                                           | 1 (0.4)    | 1.000   | 4 (0.5)    | 30 (0.4)                                             | 28 (1.1)    | <0.001  | 58 (0.6)    |
| Attitude toward a vaccine in general, not limited to the COVID-19 vaccine                |                                            |           |         |            |                                               |            |         |             |                                                   |            |         |            |                                                      |             |         |             |
| Religious beliefs                                                                        | 1 (0.3)                                    | 0 (0.0)   | 1.000   | 1 (0.2)    | 2 (0.1)                                       | 5 (1.4)    | 0.002   | 7 (0.4)     | 5 (0.8)                                           | 2 (0.9)    | 1.000   | 7 (0.9)    | 41 (0.6)                                             | 22 (0.8)    | 0.173   | 63 (0.6)    |
| Vaccines are not necessary                                                               | 11 (3.0)                                   | 2 (2.5)   | 1.000   | 13 (2.9)   | 51 (3.2)                                      | 43 (11.8)  | <0.001  | 94 (4.8)    | 15 (2.5)                                          | 15 (6.7)   | 0.010   | 30 (3.7)   | 161 (2.2)                                            | 261 (9.9)   | <0.001  | 422 (4.2)   |
| I don't think the vaccine is effective                                                   | 19 (5.1)                                   | 8 (10.0)  | 0.159   | 27 (6.0)   | 114 (7.1)                                     | 79 (21.7)  | <0.001  | 193 (9.8)   | 31 (5.3)                                          | 38 (16.9)  | <0.001  | 69 (8.5)   | 359 (4.9)                                            | 454 (17.2)  | <0.001  | 813 (8.2)   |
| I am anxious about side effects and safety of vaccines                                   | 261 (70.4)                                 | 48 (60.0) | 0.094   | 309 (68.5) | 941 (58.4)                                    | 211 (58.0) | 0.923   | 1152 (58.3) | 316 (53.6)                                        | 87 (38.7)  | <0.001  | 403 (49.4) | 3057 (41.9)                                          | 1011 (38.3) | 0.001   | 4068 (40.9) |
| I have a fear of vaccines                                                                | 61 (16.4)                                  | 15 (18.8) | 0.737   | 76 (16.9)  | 248 (15.4)                                    | 52 (14.3)  | 0.652   | 300 (15.2)  | 100 (16.9)                                        | 32 (14.2)  | 0.402   | 132 (16.2) | 1019 (14.0)                                          | 449 (17.0)  | <0.001  | 1468 (14.8) |
| Others                                                                                   | 8 (2.2)                                    | 4 (5.0)   | 0.294   | 12 (2.7)   | 19 (1.2)                                      | 8 (2.2)    | 0.207   | 27 (1.4)    | 5 (0.8)                                           | 2 (0.9)    | 1.000   | 7 (0.9)    | 48 (0.7)                                             | 23 (0.9)    | 0.326   | 71 (0.7)    |
| Lack of trust                                                                            |                                            |           |         |            |                                               |            |         |             |                                                   |            |         |            |                                                      |             |         |             |
| Vaccines in general                                                                      | 109 (29.4)                                 | 23 (28.8) | 1.000   | 132 (29.3) | 414 (25.7)                                    | 135 (37.1) | <0.001  | 549 (27.8)  | 143 (24.2)                                        | 53 (23.6)  | 0.911   | 196 (24.0) | 1500 (20.5)                                          | 742 (28.1)  | <0.001  | 2242 (22.5) |
| Government                                                                               | 133 (35.8)                                 | 30 (37.5) | 0.880   | 163 (36.1) | 546 (33.9)                                    | 138 (37.9) | 0.163   | 684 (34.6)  | 169 (28.6)                                        | 52 (23.1)  | 0.134   | 221 (27.1) | 1492 (20.4)                                          | 676 (25.6)  | <0.001  | 2168 (21.8) |
| Pharmaceutical companies                                                                 | 63 (17.0)                                  | 24 (30.0) | 0.012*  | 87 (19.3)  | 267 (16.6)                                    | 98 (26.9)  | <0.001  | 365 (18.5)  | 72 (12.2)                                         | 45 (20.0)  | 0.006   | 117 (14.4) | 658 (9.0)                                            | 429 (16.2)  | <0.001  | 1087 (10.9) |
| Medical care in general                                                                  | 15 (4.0)                                   | 10 (12.5) | 0.006   | 25 (5.5)   | 127 (7.9)                                     | 55 (15.1)  | <0.001  | 182 (9.2)   | 33 (5.6)                                          | 23 (10.2)  | 0.029*  | 56 (6.9)   | 354 (4.8)                                            | 247 (9.4)   | <0.001  | 601 (6.0)   |
| Vaccine development or testing process                                                   | 127 (34.2)                                 | 31 (38.8) | 0.523   | 158 (35.0) | 456 (28.3)                                    | 122 (33.5) | 0.056   | 578 (29.3)  | 131 (22.2)                                        | 49 (21.8)  | 0.971   | 180 (22.1) | 1197 (16.4)                                          | 530 (20.1)  | <0.001  | 1727 (17.4) |
| Others                                                                                   | 7 (1.9)                                    | 2 (2.5)   | 1.000   | 9 (2.0)    | 12 (0.7)                                      | 3 (0.8)    | 1.000   | 15 (0.8)    | 5 (0.8)                                           | 0 (0.0)    | 0.377   | 5 (0.6)    | 39 (0.5)                                             | 15 (0.6)    | 0.961   | 54 (0.5)    |
| Other reasons                                                                            |                                            |           |         |            |                                               |            |         |             |                                                   |            |         |            |                                                      |             |         |             |
| I want high-risk people to be vaccinated first                                           | 94 (25.3)                                  | 14 (17.5) | 0.179   | 108 (23.9) | 406 (25.2)                                    | 66 (18.1)  | 0.005   | 472 (23.9)  | 110 (18.6)                                        | 37 (16.4)  | 0.530   | 147 (18.0) | 1606 (22.0)                                          | 432 (16.4)  | <0.001  | 2038 (20.5) |
| I am afraid to go to a medical institution for vaccination                               | 43 (11.6)                                  | 10 (12.5) | 0.970   | 53 (11.8)  | 190 (11.8)                                    | 30 (8.2)   | 0.064   | 220 (11.1)  | 58 (9.8)                                          | 20 (8.9)   | 0.783   | 78 (9.6)   | 656 (9.0)                                            | 223 (8.4)   | 0.425   | 879 (8.8)   |
| It may not be effective for mutants                                                      | 130 (35.0)                                 | 23 (28.8) | 0.343   | 153 (33.9) | 487 (30.2)                                    | 123 (33.8) | 0.206   | 610 (30.9)  | 122 (20.7)                                        | 47 (20.9)  | 1.000   | 169 (20.7) | 1380 (18.9)                                          | 491 (18.6)  | 0.751   | 1871 (18.8) |
| I don't like needles.                                                                    | 30 (8.1)                                   | 9 (11.3)  | 0.488   | 39 (8.6)   | 173 (10.7)                                    | 39 (10.7)  | 1.000   | 212 (10.7)  | 56 (9.5)                                          | 29 (12.9)  | 0.197   | 85 (10.4)  | 828 (11.3)                                           | 407 (15.4)  | <0.001  | 1235 (12.4) |
| Others                                                                                   | 17 (4.6)                                   | 7 (8.8)   | 0.218   | 24 (5.3)   | 52 (3.2)                                      | 23 (6.3)   | 0.008   | 75 (3.8)    | 15 (2.5)                                          | 15 (6.7)   | 0.010   | 30 (3.7)   | 171 (2.3)                                            | 106 (4.0)   | <0.001  | 277 (2.8)   |

2

MA: multiple-answer question; \* Statistical significance disappeared after Bonferroni correction for multiple testing
